# Supplementary material for: Design, Synthesis, Molecular Docking Analysis and Biological Evaluations of 4-[(Quinolin-4-yl)amino]benzamide Derivatives as Novel Anti-Influenza Virus Agents
Source: MDPI journal article supplement (doi:10.3390/ijms23116307), 2022-06-04
Supplement: s1 [file s1]

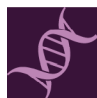

*Supplementary Materials*

# Design, Synthesis, Molecular Docking Analysis and Biological Evaluations of 4-[(Quinolin-4-yl)amino]benzamide Derivatives as Novel Anti-Influenza Virus Agents

Chao Zhang <sup>1,†</sup>, Yun-Sang Tang <sup>2,†</sup>, Chu-Ren Meng <sup>1</sup>, Jing Xu <sup>1</sup>, De-Liang Zhang <sup>1</sup>, Jian Wang <sup>1</sup>, Er-Fang Huang <sup>1</sup>, Pang-Chui Shaw <sup>2,\*</sup> and Chun Hu <sup>1,\*</sup>

<sup>1</sup> Key Laboratory of Structure-Based Drug Design & Discovery, Ministry of Education, Shenyang Pharmaceutical University, Shenyang 110016, China; zhangchaoylh@126.com (C.Z.); mengchuren@163.com (C.-R.M.); xujing9998881111@163.com (J.X.); zhangdeliang1230@163.com (D.-L.Z.); jianwang@email.com (J.W.); huang222fang@163.com (E.-F.H.)

<sup>2</sup> School of Life Sciences, The Chinese University of Hong Kong, Shatin, Hong Kong SAR 999077, China; samtys0910@gmail.com

\* Correspondence: pcsshaw@cuhk.edu.hk (P.-C.S.); chunhu@syphu.edu.cn (C.H.); Tel.: +86-24-43520246 (C.H.)

† These authors contributed equally to this work.

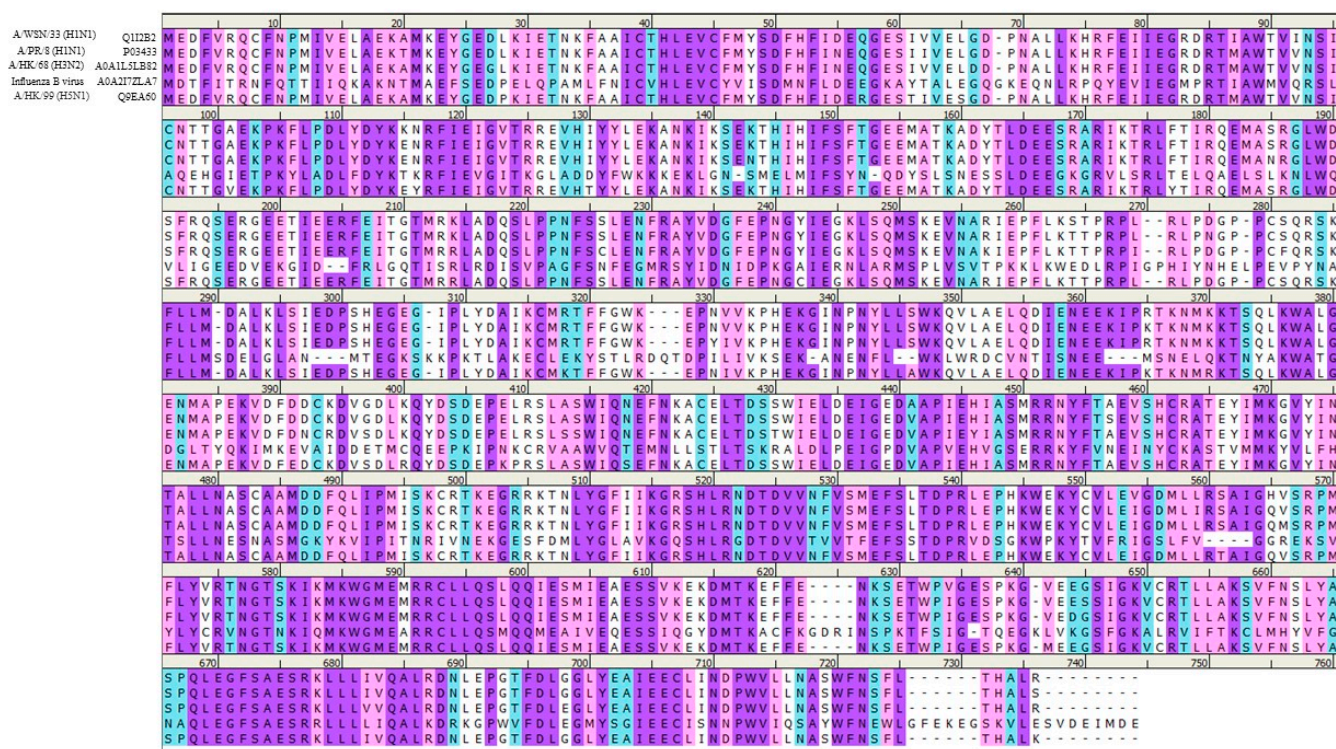

**Figure S1.** Amino acid sequence alignment of influenza virus PA protein including strain A/WSN/33 (H1N1, Uniprot accession number Q1I2B2), strain A/PR/8 (H1N1, Uniprot accession number P03433), strain A/HK/68 (H3N2, Uniprot accession number A0A1L5LB82), strain A/HK/99 (H5N1, Uniprot accession number Q9EA60) and influenza B virus (Uniprot accession number A0A2I7ZLA7). Residues that are required for PA–PB1 interface are labelled with yellow.

**Table S1.** MDCK cells survival rate by the target compounds (G01–G26) at different concentration.

| No. | MDCK cells survival rate (%)          |                                      |                                      |                                        |
|-----|---------------------------------------|--------------------------------------|--------------------------------------|----------------------------------------|
|     | 100 $\mu\text{mol}\cdot\text{L}^{-1}$ | 50 $\mu\text{mol}\cdot\text{L}^{-1}$ | 25 $\mu\text{mol}\cdot\text{L}^{-1}$ | 12.5 $\mu\text{mol}\cdot\text{L}^{-1}$ |
| G01 | 160.62±4.70                           | 121.65±8.73                          | 112.08±3.35                          | 123.45±5.51                            |
| G02 | 203.79±6.42                           | 140.08±12.49                         | 137.54±0.71                          | 153.38±36.06                           |
| G03 | 144.22±4.46                           | 132.67±1.65                          | 128.70±3.04                          | 107.23±8.32                            |
| G04 | 124.89±12.49                          | 126.43±7.03                          | 110.54±13.59                         | 118.54±1.29                            |
| G05 | 111.87±2.49                           | 101.63±4.85                          | 110.22±4.44                          | 113.26±1.76                            |
| G06 | 79.75±2.72                            | 84.01±5.28                           | 96.67±0.91                           | 95.22±3.96                             |
| G07 | 115.75±5.12                           | 256.24±17.89                         | 115.87±11.06                         | 140.55±9.82                            |
| G08 | 78.41±2.97                            | 75.20±0.25                           | 76.43±4.79                           | 95.86±1.24                             |
| G09 | 133.61±3.89                           | 130.46±12.65                         | 124.74±4.87                          | 156.36±6.13                            |
| G10 | 110.17±2.79                           | 127.95±8.15                          | 109.11±15.21                         | 84.64±7.10                             |
| G11 | 137.86±9.32                           | 127.54±0.33                          | 123.28±5.69                          | 148.07±0.17                            |
| G12 | 120.48±10.37                          | 130.46±5.65                          | 137.81±3.21                          | 92.77±4.37                             |
| G13 | 65.91±7.51                            | 92.20±10.16                          | 87.73±16.36                          | 89.39±3.87                             |
| G14 | 56.76±2.08                            | 72.26±17.99                          | 91.16±1.34                           | 82.40±6.45                             |
| G15 | 76.18±1.27                            | 93.36±4.01                           | 82.80±5.22                           | 92.13±3.70                             |
| G16 | 103.91±10.21                          | 92.23±7.81                           | 85.52±2.56                           | 83.03±1.26                             |
| G17 | 51.32±5.29                            | 63.22±11.25                          | 65.78±1.15                           | 71.49±1.03                             |
| G18 | 104.99±4.01                           | 138.28±6.89                          | 111.55±2.20                          | 112.99±2.36                            |
| G19 | 111.55±9.83                           | 102.17±1.95                          | 93.23±8.08                           | 90.89±5.31                             |
| G20 | 8.66±0.17                             | 8.88±0.51                            | 8.61±0.42                            | 45.97±9.1                              |
| G21 | 88.84±3.59                            | 93.28±9.93                           | 80.18±7.27                           | 83.41±3.67                             |

|            |              |             |             |             |
|------------|--------------|-------------|-------------|-------------|
| <b>G22</b> | 118.12±6.49  | 104.22±9.18 | 99.56±3.73  | 95.78±2.47  |
| <b>G23</b> | 91.28±3.45   | 100.33±3.53 | 106.22±9.35 | 101.22±6.39 |
| <b>G24</b> | 105.38±8.08  | 87.44±3.70  | 71.98±13.89 | 97.97±11.82 |
| <b>G25</b> | 79.32±11.90  | 86.83±3.19  | 85.96±5.73  | 92.58±5.23  |
| <b>G26</b> | 133.91±11.97 | 122.08±7.85 | 105.52±6.56 | 103.03±1.26 |

**Table S2.** HEK293T cells survival rate by the target compounds (G01-G26) at different concentration.

| No.        | HEK293T cells survival rate (%)       |                                      |                                      |                                        |                                        |                                         |
|------------|---------------------------------------|--------------------------------------|--------------------------------------|----------------------------------------|----------------------------------------|-----------------------------------------|
|            | 100 $\mu\text{mol}\cdot\text{L}^{-1}$ | 50 $\mu\text{mol}\cdot\text{L}^{-1}$ | 25 $\mu\text{mol}\cdot\text{L}^{-1}$ | 12.5 $\mu\text{mol}\cdot\text{L}^{-1}$ | 6.25 $\mu\text{mol}\cdot\text{L}^{-1}$ | 3.125 $\mu\text{mol}\cdot\text{L}^{-1}$ |
| <b>G01</b> | 94.92±8.61                            | 88.18±3.27                           | 92.83±4.26                           | 93.22±5.27                             | 90.01±2.87                             | 91.00±7.40                              |
| <b>G02</b> | 66.13±2.32                            | 75.54±11.17                          | 74.04±2.91                           | 85.31±11.55                            | 87.90±2.52                             | 95.91±3.00                              |
| <b>G03</b> | 74.22±4.02                            | 84.12±2.84                           | 91.10±7.09                           | 97.78±4.47                             | 89.61±8.87                             | 98.97±9.80                              |
| <b>G04</b> | 96.30±10.52                           | 98.62±11.78                          | 91.99±5.43                           | 94.50±4.33                             | 100.01±1.56                            | 112.00±4.22                             |
| <b>G05</b> | 122.90±10.09                          | 93.06±1.61                           | 95.07±1.76                           | 96.82±2.21                             | 109.11±25.17                           | 106.06±4.46                             |
| <b>G06</b> | 76.47±9.94                            | 85.25±2.63                           | 85.50±2.49                           | 96.59±4.26                             | 90.35±0.85                             | 107.15±2.76                             |
| <b>G07</b> | 81.39±7.21                            | 90.17±2.90                           | 87.01±2.19                           | 91.58±3.34                             | 97.91±1.23                             | 106.60±2.14                             |
| <b>G08</b> | 112.13±1.41                           | 98.07±1.80                           | 95.56±2.29                           | 95.72±3.30                             | 97.00±3.10                             | 100.86±3.39                             |
| <b>G09</b> | 81.22±3.80                            | 101.55±2.23                          | 96.79±0.62                           | 92.83±3.70                             | 98.20±3.74                             | 106.48±6.90                             |
| <b>G10</b> | 109.24±7.99                           | 99.09±8.41                           | 98.50±8.84                           | 98.12±8.96                             | 104.56±4.92                            | 108.01±12.84                            |
| <b>G11</b> | 86.44±8.60                            | 103.77±9.35                          | 108.76±5.63                          | 105.25±12.82                           | 101.78±7.08                            | 129.49±22.76                            |
| <b>G12</b> | 74.00±4.57                            | 80.68±3.36                           | 88.50±7.54                           | 86.67±6.98                             | 89.50±2.30                             | 100.47±5.92                             |
| <b>G13</b> | 81.89±2.67                            | 80.60±2.01                           | 88.23±4.29                           | 89.92±2.14                             | 96.29±4.65                             | 99.14±6.42                              |
| <b>G14</b> | 77.49±2.55                            | 76.77±5.03                           | 80.67±2.20                           | 89.38±1.59                             | 95.00±7.82                             | 105.78±7.34                             |
| <b>G15</b> | 81.59±1.91                            | 89.01±2.08                           | 103.00±3.15                          | 93.38±3.30                             | 104.46±0.45                            | 105.64±1.62                             |
| <b>G16</b> | 66.51±2.68                            | 70.68±3.36                           | 75.35±5.51                           | 80.26±3.54                             | 79.52±2.87                             | 89.31±3.06                              |
| <b>G17</b> | 59.17±1.33                            | 52.36±1.02                           | 62.61±12.04                          | 78.02±11.06                            | 89.66±6.31                             | 86.81±4.81                              |
| <b>G18</b> | 86.90±1.67                            | 72.68±1.96                           | 65.43±6.72                           | 70.43±2.98                             | 87.82±9.55                             | 98.42±9.98                              |
| <b>G19</b> | 112.18±7.45                           | 97.40±3.36                           | 97.97±3.74                           | 103.11±7.45                            | 103.54±9.29                            | 103.14±6.28                             |
| <b>G20</b> | 60.29±0.35                            | 80.21±1.35                           | 87.46±21.36                          | 94.07±9.07                             | 91.48±3.65                             | 96.66±8.01                              |
| <b>G21</b> | 50.09±0.70                            | 110.67±8.55                          | 102.64±2.91                          | 105.56±6.72                            | 103.95±2.65                            | 117.39±1.03                             |
| <b>G22</b> | 86.07±5.65                            | 88.83±5.80                           | 89.97±4.08                           | 91.65±2.90                             | 103.91±6.77                            | 117.25±6.52                             |
| <b>G23</b> | 88.11±4.02                            | 96.62±7.74                           | 89.02±3.47                           | 95.29±3.05                             | 96.34±4.31                             | 93.57±3.31                              |
| <b>G24</b> | 72.95±4.52                            | 69.53±3.05                           | 91.06±10.23                          | 91.88±3.61                             | 96.70±5.40                             | 113.31±4.70                             |
| <b>G25</b> | 110.35±11.54                          | 101.61±11.65                         | 65.73±7.64                           | 99.13±1.95                             | 103.50±6.33                            | 104.71±1.87                             |
| <b>G26</b> | 70.01±9.07                            | 72.10±1.56                           | 74.64±5.24                           | 78.70±2.98                             | 83.92±2.40                             | 104.54±2.55                             |

**Table S3.** The results of the target compounds (G01-G26) in CPE assay.

| No.        | Antiviral activity (%)                |                                      |                                      |                                        |
|------------|---------------------------------------|--------------------------------------|--------------------------------------|----------------------------------------|
|            | 100 $\mu\text{mol}\cdot\text{L}^{-1}$ | 50 $\mu\text{mol}\cdot\text{L}^{-1}$ | 25 $\mu\text{mol}\cdot\text{L}^{-1}$ | 12.5 $\mu\text{mol}\cdot\text{L}^{-1}$ |
| <b>G01</b> | 70.86±2.63                            | 53.02±4.28                           | 56.59±3.96                           | 47.99±4.04                             |
| <b>G02</b> | 80.63±9.03                            | 76.65±2.26                           | 61.59±2.13                           | 53.61±3.38                             |
| <b>G03</b> | 78.65±8.35                            | 70.28±9.33                           | 56.70±11.65                          | 54.88±4.62                             |
| <b>G04</b> | 49.29±0.74                            | 57.10±9.30                           | 54.64±4.19                           | 55.30±4.28                             |
| <b>G05</b> | 56.04±4.37                            | 50.22±1.80                           | 48.58±2.31                           | 41.99±5.50                             |
| <b>G06</b> | 11.19±0.23                            | 12.81±0.69                           | 13.13±0.69                           | 16.70±1.15                             |
| <b>G07</b> | 111.81±4.30                           | 106.66±2.43                          | 78.16±8.28                           | 61.4±6.86                              |
| <b>G08</b> | 15.40±0.23                            | 31.13±8.71                           | 45.56±9.40                           | 44.26±3.44                             |
| <b>G09</b> | 23.19±3.90                            | 21.40±0.92                           | 22.86±3.90                           | 31.94±0.69                             |
| <b>G10</b> | 63.82±5.18                            | 66.21±2.87                           | 58.04±1.69                           | 48.88±2.01                             |
| <b>G11</b> | 47.34±0.92                            | 44.10±1.38                           | 52.37±3.44                           | 47.67±9.63                             |
| <b>G12</b> | 76.69±5.27                            | 75.72±9.49                           | 97.61±3.67                           | 70.86±4.82                             |

|            |             |             |             |              |
|------------|-------------|-------------|-------------|--------------|
| <b>G13</b> | 34.33±7.15  | 36.85±4.41  | 33.13±4.47  | 27.01±2.20   |
| <b>G14</b> | 27.85±2.05  | 23.35±2.31  | 20.69±3.82  | 16.43±0.12   |
| <b>G15</b> | 45.63±5.12  | 35.30±1.81  | 39.84±4.98  | 36.89±0.82   |
| <b>G16</b> | 45.67±2.09  | 33.78±2.71  | 36.84±3.16  | 15.65±1.33   |
| <b>G17</b> | 28.52±7.81  | 21.09±1.62  | 27.32±3.16  | 33.50±1.23   |
| <b>G18</b> | 35.46±9.67  | 38.69±4.29  | 39.45±1.72  | 42.79±0.57   |
| <b>G19</b> | 122.29±5.08 | 137.86±9.95 | 131.63±4.75 | 130.64±11.05 |
| <b>G20</b> | 31.14±0.49  | 30.86±0.88  | 28.59±1.61  | 72.05±6.36   |
| <b>G21</b> | 50.11±5.45  | 39.77±6.58  | 39.77±7.16  | 43.03±7.31   |
| <b>G22</b> | 97.38±10.19 | 105.73±5.94 | 108.00±8.75 | 112.24±6.15  |
| <b>G23</b> | 119.46±7.71 | 119.75±0.68 | 143.1±6.11  | 145.65±3.38  |
| <b>G24</b> | 18.38±1.27  | 19.17±0.42  | 19.22±0.69  | 20.99±2.86   |
| <b>G25</b> | 22.28±0.40  | 22.51±1.29  | 25.71±2.29  | 26.10±0.67   |
| <b>G26</b> | 49.67±6.09  | 36.78±1.79  | 16.82±2.11  | 15.65±1.06   |

**Table S4.** The results of the target compound (G07) in plaque inhibition assay against different influenza virus strains.

| Influenza virus strains | Viral Yield (%)                       |                                      |                                      |                                        |                                        |
|-------------------------|---------------------------------------|--------------------------------------|--------------------------------------|----------------------------------------|----------------------------------------|
|                         | 100 $\mu\text{mol}\cdot\text{L}^{-1}$ | 50 $\mu\text{mol}\cdot\text{L}^{-1}$ | 25 $\mu\text{mol}\cdot\text{L}^{-1}$ | 12.5 $\mu\text{mol}\cdot\text{L}^{-1}$ | 6.25 $\mu\text{mol}\cdot\text{L}^{-1}$ |
| A/WSN/33 (H1N1)         | 4.09±0.14                             | 39.70±0.88                           | 5.00±2.18                            | 24.55±0.43                             | 18.86±1.30                             |
| Influenza B virus       | 7.79±1.49                             | 11.93±1.77                           | 39.86±6.11                           | 43.38±6.70                             | 70.02±5.44                             |
| A/PR/8 (H1N1)           | 0                                     | 1.18±0.22                            | 16.64±3.83                           | 55.79±5.58                             | 70.77±8.80                             |
| A/HK/68 (H1N1)          | 0.05±0.04                             | 0.16±0.12                            | 1.10±8.27                            | 45.00±9.04                             | 77.00±5.61                             |

## 1. Materials and Method

### 1.1. Pharmacophore Model Generation

#### 1.1.1. Compound Preparations

39 PA-PB1 endonuclease inhibitors collected from difference literatures [1-7] were split into training set and test set. The two-dimensional (2D) structures of these compounds were drawn by BIOVIA Draw 2016. The corresponding three-dimensional (3D) form were converted by Discovery Studio 2016 [8]. The training set compounds and test set compounds were enlisted in Figures S2 and S3. The pharmacophore models were generated using training set. The test set was utilized to validate the generated pharmacophore model. We minimized each compound using Smart Minimizer algorithm based on CHARMM force field method. In addition, each compound could form a variety of maximum 255 different conformations to generate pharmacophore hypothesis [9].

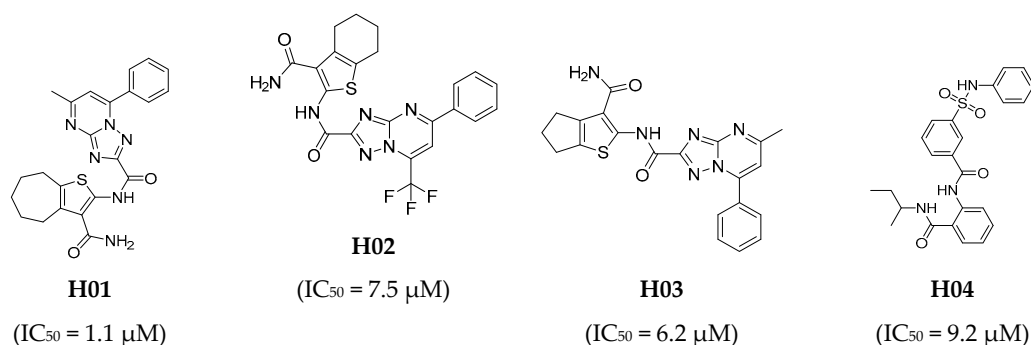

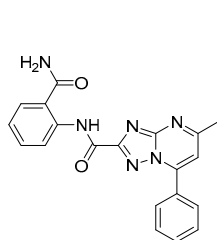**H05**(IC<sub>50</sub> = 11 μM)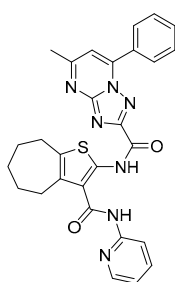**H06**(IC<sub>50</sub> = 23 μM)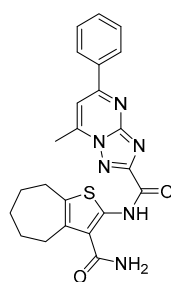**H07**(IC<sub>50</sub> = 28 μM)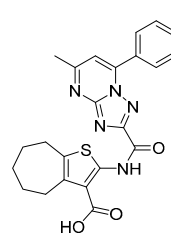**H08**(IC<sub>50</sub> = 19 μM)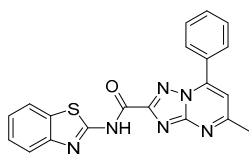**H09**(IC<sub>50</sub> = 21 μM)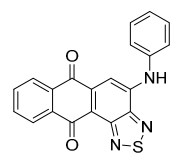**H10**(IC<sub>50</sub> = 9.5 μM)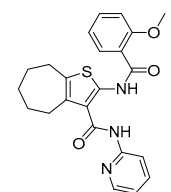**H11**(IC<sub>50</sub> = 22 μM)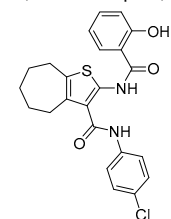**H12**(IC<sub>50</sub> = 18 μM)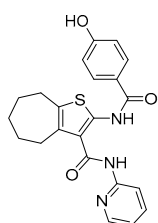**H13**(IC<sub>50</sub> = 26 μM)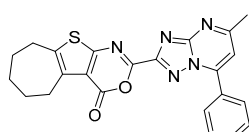**H14**(IC<sub>50</sub> = 19 μM)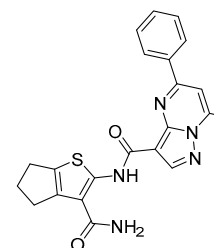**H15**(IC<sub>50</sub> = 44.8 μM)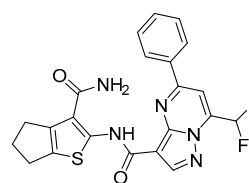**H16**(IC<sub>50</sub> = 25.4 μM)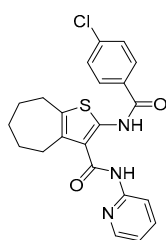**H17**(IC<sub>50</sub> = 32 μM)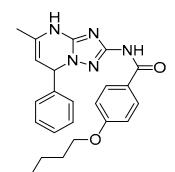**H18**(IC<sub>50</sub> = 37 μM)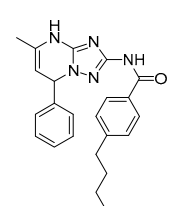**H19**(IC<sub>50</sub> = 48 μM)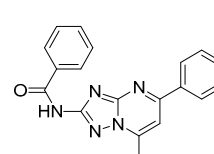**H20**(IC<sub>50</sub> = 26 μM)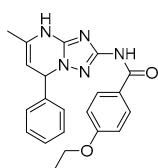**H21**(IC<sub>50</sub> = 40 μM)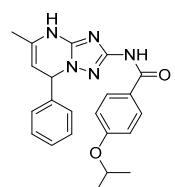**H22**(IC<sub>50</sub> = 75 μM)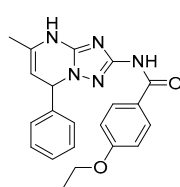**H23**(IC<sub>50</sub> = 139 μM)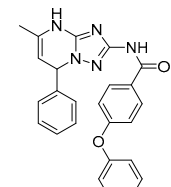**H24**(IC<sub>50</sub> = 156 μM)

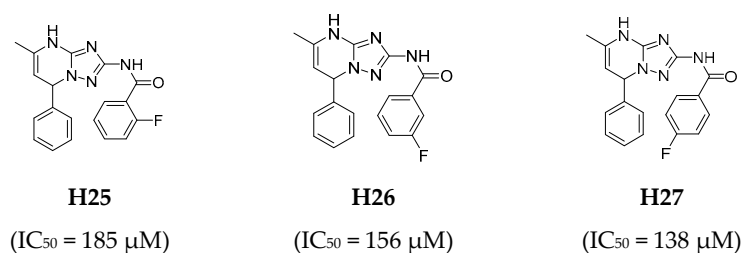

**Figure S2.** Chemical structures of PA-PB1 endonuclease inhibitors in the training set together with their biological activity data (IC<sub>50</sub> value, μM).

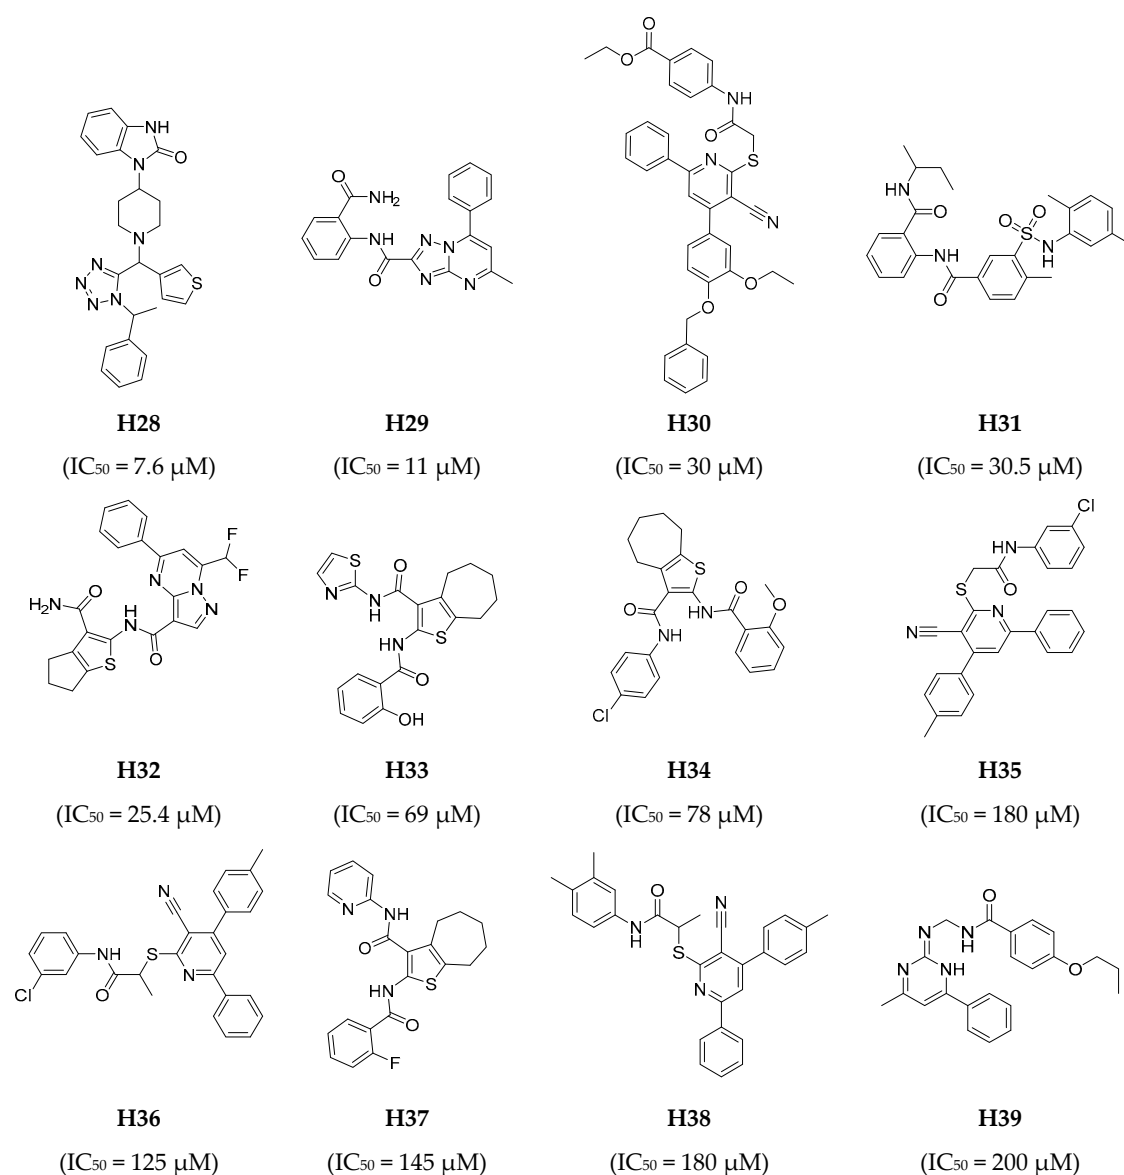

**Figure S3.** Chemical structures of PA-PB1 endonuclease inhibitors in the test set together with their biological activity data (IC<sub>50</sub> value, μM).

### 1.1.2. Generation of Pharmacophore Models

The 3D-QSAR pharmacophore generation protocol in Discovery Studio 2016 were used to generate the pharmacophore models. Usually, there were six different chemical features [hydrogen bond acceptor (HBA), hydrogen bond donor (HBD), hydrophobic (HYD), positive ionizable (PI), ring aromatic (RA) and negative ionizable (NI)]. Feature

Mapping protocol was used to seek the presenting chemical features of the training set molecules. FAST algorithm method was used to generate acceptable conformations with 10 kcal/mol as the energy threshold. We set uncertainty values of each compound (training set and test set compounds) as 1.5. The active property represented the IC<sub>50</sub> values of compounds. We usually set the maximum excluded volume as zero during the pharmacophore generation. Furthermore, Minimum Inter feature Distance was ranged from 2.97 to 2.0. The energy threshold was maintained at 20 kcal/mol [10].

### 1.1.3. Pharmacophore Validation

Three kinds of methods (Cost analysis, Fischer's randomization test and Test set analysis) were usually to validate the generated pharmacophore models.

$\Delta$ Cost (Null cost - Total cost) is a key parameter in cost analysis. It infers more than 90% prediction range if the cost difference is more than 60 bits. The model might exhibit 70-90% prediction range if the cost difference is in the range of 40-60 bits. The model is unreliable when the cost difference is less than 40 bits [11]. Fischer's randomization test also could be used to validate the selected pharmacophore hypothesis [12]. Test set analysis is another method to validate the pharmacophore model by Ligand Pharmacophore Mapping protocol (Discovery Studio 2016) [11].

## 2. Result and Discussion

### 2.1. Pharmacophore Model Generation

The Hypogen algorithm 3D-QSAR Pharmacophore (Discovery Studio 2016) was used to generate pharmacophore models (Table S5) using 27 training set compounds (1.1  $\mu$ M to 185  $\mu$ M). Figure S4 demonstrated the features (HBA, RA and HYD) of the training set molecules. The statistical parameters (cost, correlation coefficient, RMSD and chemical features) of the top 10 pharmacophore hypotheses were enlisted in Table S5. The null cost and fixed cost of the generated pharmacophore models were 169.572 and 79.8661, respectively. The total costs were ranging from 94.2536 to 111.805. Hypo1 with the highest cost difference (75.318), the best correlation coefficient (0.937771), the least RMSD (0.973343), and the lowest total cost value (94.2536) was regarded as the best hypothesis.

The molecules selected from previously articles were divided into four groups of magnitude based on their corresponding experimental activity value (IC<sub>50</sub>): most active ( $\leq$  10  $\mu$ M, +++), active (10 to 100  $\mu$ M, ++), moderately active (100 to 150  $\mu$ M, +) and inactive ( $>$ 150  $\mu$ M, -). The specific experimental and estimate activity values of the training set compounds were enlisted in Table S6. Compound H01 mapped well with all the essential features and was considered as the most active molecules (Figure S5A). Compound H27 (Figure S5B) as the least active molecules in the test set were not nicely mapped with all the essential features.

**Table S5.** Statistical results of the top 10 pharmacophore hypotheses generated by HypoGen algorithm.

| Hypo.no. | Total cost | Cost difference | RMSD     | Correlation | Max.Fit | Features          |
|----------|------------|-----------------|----------|-------------|---------|-------------------|
| 1        | 94.2536    | 75.318          | 0.973343 | 0.937771    | 5.84065 | HBA, HYD, HYD, RA |
| 2        | 95.5169    | 74.055          | 1.05636  | 0.926099    | 6.69214 | HBD, HYD, HYD, RA |
| 3        | 103.639    | 65.933          | 1.26886  | 0.891562    | 5.56148 | HBD, HYD, HYD, RA |
| 4        | 103.659    | 65.913          | 1.32377  | 0.881017    | 7.36907 | HBA, HYD, HYD, RA |

|    |         |        |         |          |         |                   |
|----|---------|--------|---------|----------|---------|-------------------|
| 5  | 105.824 | 63.748 | 1.33186 | 0.87975  | 5.5772  | HBD, HYD, HYD, RA |
| 6  | 109.041 | 60.531 | 1.35845 | 0.874663 | 4.47324 | HBA, HBA, HYD, RA |
| 7  | 110.744 | 58.828 | 1.5048  | 0.843123 | 7.05175 | HBA, HYD, HYD, RA |
| 8  | 111.258 | 58.314 | 1.37231 | 0.871908 | 3.82642 | HBA, HBA, RA      |
| 9  | 111.479 | 58.093 | 1.46451 | 0.852467 | 3.911   | HBA, HBA, RA      |
| 10 | 111.805 | 57.767 | 1.48427 | 0.848056 | 5.46743 | HBD, HYD, HYD, RA |

Null cost = 169.572, \*Fixed cost = 79.8661, \*Best record in pass = 4.  
(RA-ring aromatic, HBA-hydrogen bond acceptor, HBD-hydrogen bond donor, HYD-hydrophobic).

**Table S6.** Experimental and Estimate activity of the training set compounds based on pharmacophore model Hypo1.

| Comp No. | IC <sub>50</sub> value(μM) |           | Errors <sup>a</sup> | Fit value <sup>b</sup> | Activity scale <sup>c</sup> |           |
|----------|----------------------------|-----------|---------------------|------------------------|-----------------------------|-----------|
|          | Experimental               | Estimated |                     |                        | Experimental                | Estimated |
| H01      | 1.1                        | 1.13348   | 1.03044             | 5.51979                | ++++                        | ++++      |
| H02      | 6.2                        | 3.1319    | -1.97963            | 5.07839                | ++++                        | ++++      |
| H03      | 7.5                        | 10.9565   | 1.46087             | 4.53453                | ++++                        | ++++      |
| H04      | 9.2                        | 11.6099   | 1.26195             | 4.50937                | ++++                        | +++       |
| H05      | 11                         | 11.7061   | 1.06419             | 4.50579                | +++                         | +++       |
| H06      | 23                         | 18.6451   | -1.23357            | 4.30364                | +++                         | +++       |
| H07      | 28                         | 19.6764   | -1.42302            | 4.28025                | +++                         | +++       |
| H08      | 19                         | 20.3469   | 1.07089             | 4.2657                 | +++                         | +++       |
| H09      | 21                         | 21.1091   | 1.0052              | 4.24973                | +++                         | +++       |
| H10      | 9.5                        | 22.2311   | 2.34012             | 4.22724                | ++++                        | +++       |
| H11      | 22                         | 22.8343   | 1.03792             | 4.21561                | +++                         | +++       |
| H12      | 18                         | 23.2991   | 1.29439             | 4.20686                | +++                         | +++       |
| H13      | 26                         | 23.425    | -1.10993            | 4.20452                | +++                         | +++       |
| H14      | 19                         | 23.5925   | 1.24171             | 4.20143                | +++                         | +++       |
| H15      | 44.8                       | 23.8032   | -1.8821             | 4.19756                | +++                         | +++       |
| H16      | 25.4                       | 25.1077   | -1.01164            | 4.17439                | +++                         | +++       |
| H17      | 32                         | 25.4979   | -1.25501            | 4.1677                 | +++                         | +++       |
| H18      | 37                         | 32.333    | -1.14434            | 4.06455                | +++                         | +++       |
| H19      | 48                         | 57.8447   | 1.2051              | 3.81194                | +++                         | +++       |
| H20      | 26                         | 60.705    | 2.33481             | 3.79098                | +++                         | +++       |
| H21      | 40                         | 80.8886   | 2.02222             | 3.66631                | +++                         | +++       |
| H22      | 75                         | 83.5914   | 1.11455             | 3.65204                | +++                         | +++       |
| H23      | 139                        | 84.0055   | -1.65465            | 3.64989                | ++                          | +++       |
| H24      | 156                        | 92.7544   | -1.68186            | 3.60687                | +                           | +++       |
| H25      | 185                        | 113.674   | -1.62746            | 3.51854                | +                           | ++        |
| H26      | 156                        | 130.409   | -1.19624            | 3.45889                | +                           | ++        |
| H27      | 138                        | 143.644   | 1.0409              | 3.41691                | ++                          | ++        |

<sup>a</sup> Error factor calculated as the ratio of the measured activity to the estimated activity; positive value indicates that the estimated IC<sub>50</sub> is higher than the experimental IC<sub>50</sub>; a negative value indicates that the estimated IC<sub>50</sub> is lower than the experimental IC<sub>50</sub> value.

<sup>b</sup> Fit value indicates how well the features in the pharmacophore map with the chemical features present in the compound.



<sup>c</sup> Activity scale: +++,  $IC_{50} \leq 10 \mu M$  (most active); ++,  $IC_{50}$  10 to  $100 \mu M$  (active); +,  $IC_{50}$  100 to  $150 \mu M$  (moderately active); -,  $IC_{50} > 150 \mu M$  (inactive)

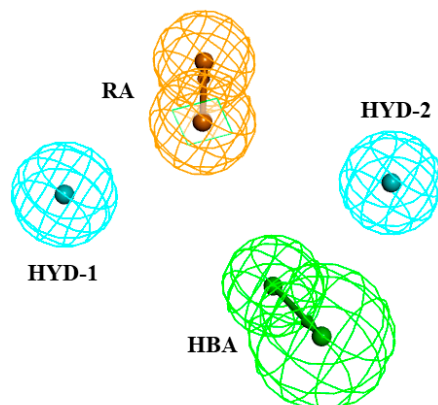

**Figure S4.** The best HypoGen Pharmacophore model (Hypo1). Green color represents HBA, Purple color represents HBD, Blue color represents HYD.

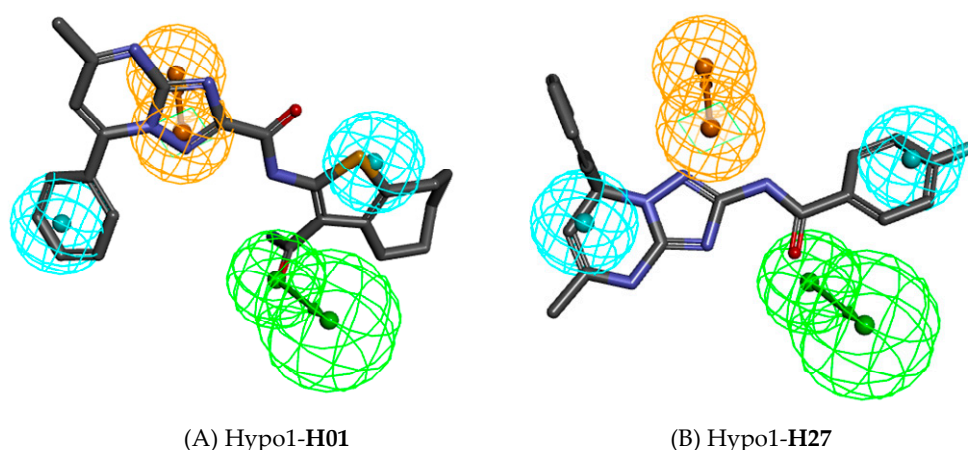

(A) Hypo1-H01

(B) Hypo1-H27

**Figure S5.** Pharmacophore mapping of the most active and less active compounds in the training set. (A) Hypo1 mapped on to the most active compound **H01**; (B) Hypo1 mapped on to the least active compound **H27**.

## 2.2. Validation of the Pharmacophore Models

### 2.2.1. Cost Analysis

Three cost values (total cost, fixed cost, and null cost) (**Table S5**) were used to analyze the ability of Hypo1 to predict the experimental activity of training set compounds. The highest cost difference value (75.318) of Hypo1 demonstrated that Hypo1 exhibited significant predicted probability. Thus, Hypo1 could be considered as a significant pharmacophore model depended on the cost analysis.

### 2.2.2. Fischer's Randomization Test

The experimental activity values of training set compounds were scrambled randomly. With a 95% confidence level, these values were used in pharmacophore generation and put forth 19 random spreadsheets. Then we compared these results with the originally generated pharmacophore (Hypo1). Figure S6 revealed the differences of correlations (Figure S6A) and costs values (Figure S6B) between the HypoGen and Fischer's randomizations. None of the randomly generated pharmacophores obtained a better statistical value than Hypo1.

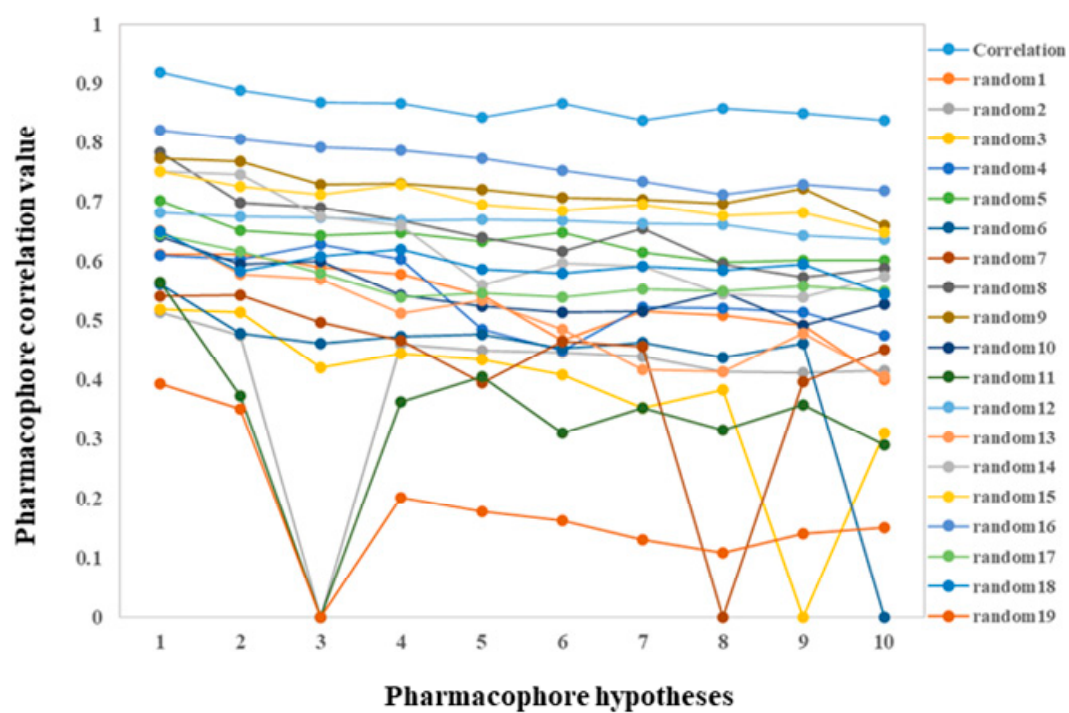

(A)

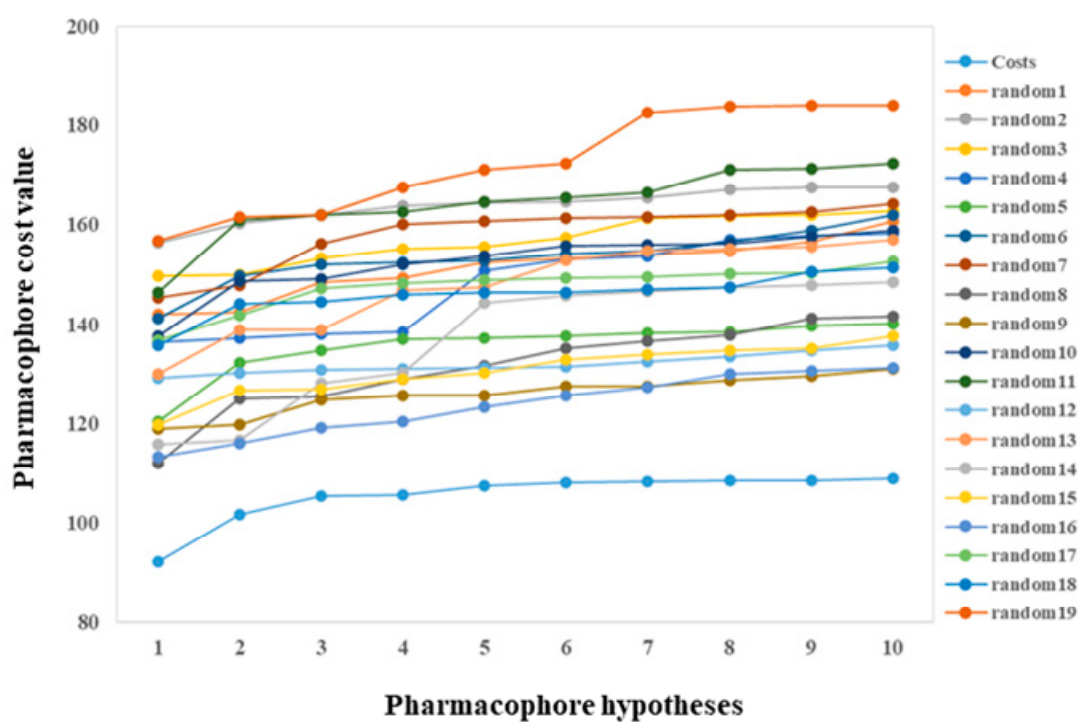

(B)

**Figure S6.** (A) & (B): The difference in correlation and total cost values of hypotheses between a Hypo1 spreadsheet and 19 random spreadsheets.

## 2.2.3. Test Set Analysis

**Table S7.** Experimental and Estimate activity of the test set compounds based on pharmacophore model Hypo1.

| Comp No. | IC <sub>50</sub> value(μM) |           | Errors <sup>a</sup> | Fit value <sup>b</sup> | Activity scale <sup>c</sup> |           |
|----------|----------------------------|-----------|---------------------|------------------------|-----------------------------|-----------|
|          | Experimental               | Estimated |                     |                        | Experimental                | Estimated |
| H28      | 7.6                        | 5.07013   | -1.49898            | 4.86918                | ++++                        | ++++      |
| H29      | 11                         | 11.7061   | 1.06419             | 4.50579                | +++                         | +++       |
| H30      | 30                         | 13.764    | -2.1796             | 4.43546                | +++                         | +++       |
| H31      | 30.5                       | 14.5216   | -2.10032            | 4.41218                | +++                         | +++       |
| H32      | 25.4                       | 45.1026   | 1.77569             | 3.92                   | +++                         | +++       |
| H33      | 69                         | 55.8074   | -1.2364             | 3.82751                | +++                         | +++       |
| H34      | 78                         | 62.5108   | -1.24778            | 3.77825                | +++                         | +++       |
| H35      | 180                        | 125.726   | -1.43168            | 3.47478                | +                           | ++        |
| H36      | 125                        | 135.665   | 1.08532             | 3.44173                | ++                          | ++        |
| H37      | 145                        | 141.311   | -1.02611            | 3.42402                | ++                          | ++        |
| H38      | 180                        | 158.88    | -1.13293            | 3.37313                | +                           | +         |
| H39      | 200                        | 255.843   | 1.27921             | 3.16623                | +                           | +         |

<sup>a</sup> Error factor calculated as the ratio of the measured activity to the estimated activity; positive value indicates that the estimated IC<sub>50</sub> is higher than the experimental IC<sub>50</sub>; a negative value indicates that the estimated IC<sub>50</sub> is lower than the experimental IC<sub>50</sub> value.

<sup>b</sup> Fit value indicates how well the features in the pharmacophore map with the chemical features present in the compound.

<sup>c</sup> Activity scale: +++, IC<sub>50</sub> ≤ 10 μM (most active); +, IC<sub>50</sub> 10 to 100 μM (active); ++, IC<sub>50</sub> 100 to 150 μM (moderately active); +, IC<sub>50</sub> >150 μM (inactive).

The reliability of the selected pharmacophore model depends on its ability to predict the bioactivity of the test set compounds. 12 chemically diverse compounds with IC<sub>50</sub> values ranged from 7.6 μM to 200 μM were selected as test set. We used the protocol in Discovery Studio to map the test set molecules to test the predictability ability of the pharmacophore model. Table S7 enlisted the estimated activity values of the test set compounds. The correlation coefficients between experimental and estimated PA-PB1 endonuclease inhibitory activity values for the training set ( $r^2 = 0.937771$ ) and the test set ( $r^2 = 0.909000$ ) were shown in Figure S7. Among the 12 compounds, the best active compound T28 mapped well with the four essential features (Figure S8). The least active molecule T39 did not map with the essential RA feature, which signified the robustness of the pharmacophore model (Figure S8).

The employed three validation strategies implied that Hypo1 model could be selected as a significant pharmacophore model for further screening chemical databases with diverse structural entities.

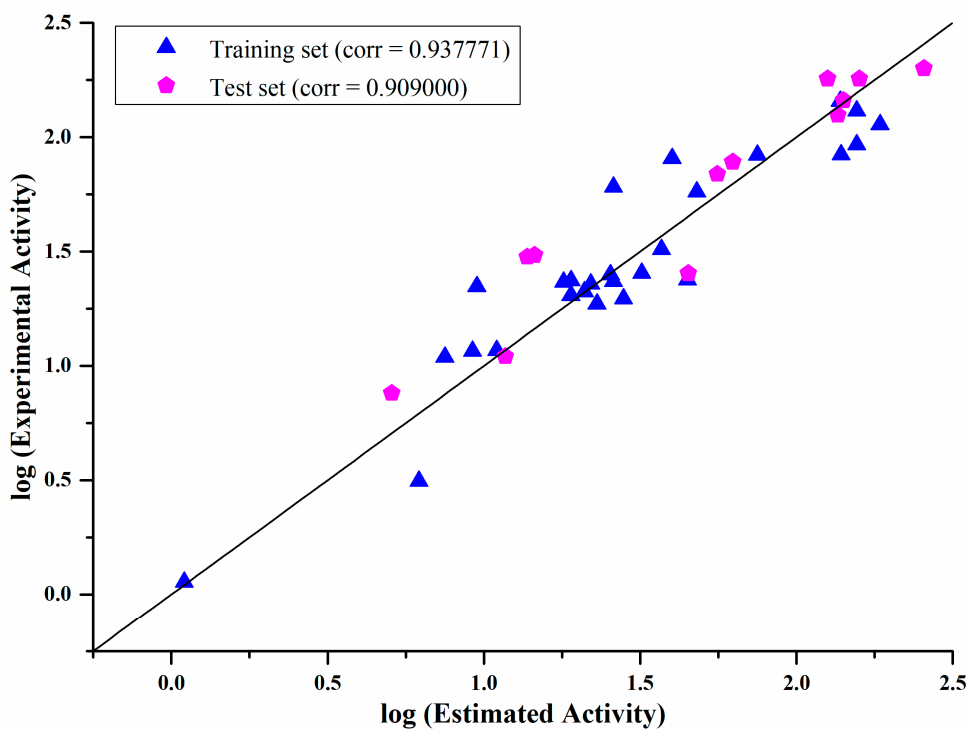

**Figure S7.** Correlation graph between experimental and estimated activity values in logarithmic scale for training and test set compounds based on Hypo1.

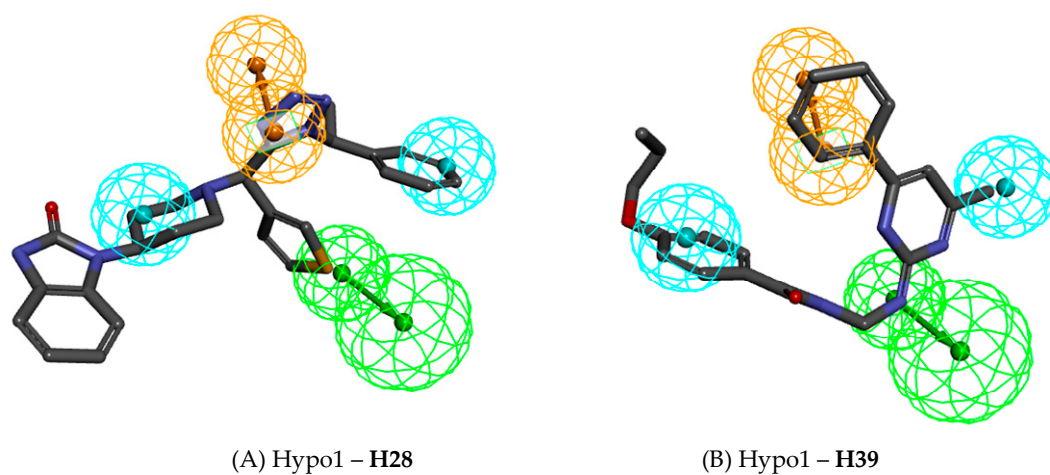

**Figure S8.** Pharmacophore mapping of the most active, less active compounds in the test set. (A) Hypo1 mapped on to the most active compound H28; (B) Hypo1 mapped on to the least active compound H39.

**Table S8.** The results of Lipinski's rule calculation for compounds G01-G26.

| Comp No. | Alop  | MW      | No. Aromatic Ring | No. HBA | No. HBD | No. rotatable bonds |
|----------|-------|---------|-------------------|---------|---------|---------------------|
| G01      | 4.065 | 359.352 | 3                 | 3       | 2       | 5                   |
| G02      | 4.443 | 373.379 | 3                 | 3       | 2       | 5                   |
| G03      | 4.589 | 373.379 | 3                 | 3       | 2       | 6                   |
| G04      | 3.177 | 375.352 | 3                 | 4       | 3       | 6                   |
| G05      | 3.239 | 389.379 | 3                 | 4       | 3       | 7                   |

|     |       |         |   |   |   |    |
|-----|-------|---------|---|---|---|----|
| G06 | 4.615 | 444.502 | 3 | 4 | 2 | 10 |
| G07 | 5.332 | 481.477 | 4 | 5 | 2 | 9  |
| G08 | 3.605 | 458.486 | 3 | 5 | 2 | 8  |
| G09 | 5.575 | 413.444 | 3 | 3 | 2 | 5  |
| G10 | 4.338 | 429.444 | 3 | 4 | 3 | 5  |
| G11 | 5.3   | 421.423 | 4 | 3 | 2 | 6  |
| G12 | 3.61  | 401.39  | 3 | 4 | 1 | 4  |
| G13 | 6.038 | 490.53  | 4 | 4 | 1 | 5  |
| G14 | 6.038 | 490.53  | 4 | 4 | 1 | 5  |
| G15 | 7.671 | 560.5   | 4 | 4 | 1 | 7  |
| G16 | 6.494 | 544.5   | 4 | 4 | 1 | 6  |
| G17 | 6.216 | 510.948 | 4 | 4 | 1 | 5  |
| G18 | 5.884 | 520.557 | 4 | 5 | 1 | 7  |
| G19 | 4.39  | 413.48  | 4 | 5 | 2 | 8  |
| G20 | 4.876 | 427.507 | 4 | 5 | 2 | 8  |
| G21 | 4.876 | 427.507 | 4 | 5 | 2 | 8  |
| G22 | 6.51  | 497.477 | 4 | 6 | 2 | 10 |
| G23 | 3.141 | 459.487 | 4 | 7 | 3 | 9  |
| G24 | 5.138 | 492.376 | 4 | 5 | 2 | 8  |
| G25 | 5.054 | 447.925 | 4 | 5 | 2 | 8  |
| G26 | 5.332 | 481.477 | 4 | 5 | 2 | 9  |

MW: molecular weight; HBA: H-bond acceptors; HBD: H-bond donors

**Table S9.** The ADMET prediction results for compounds G01-G26.

| Comp No. | ADME Solubility Level | ADME BBB Level | ADME Absorption Level | Hepatotoxic | PPB Prediction | Toxicity Probability |
|----------|-----------------------|----------------|-----------------------|-------------|----------------|----------------------|
| G01      | 2                     | 1              | 0                     | -5.05652    | true           | 0.0226               |
| G02      | 2                     | 1              | 0                     | -3.80375    | true           | 0.0197               |
| G03      | 2                     | 1              | 0                     | -4.21702    | true           | 0.0236               |
| G04      | 2                     | 2              | 0                     | -5.84686    | true           | 0.0322               |
| G05      | 2                     | 2              | 0                     | -6.95457    | true           | 0.0304               |
| G06      | 2                     | 1              | 0                     | -6.90941    | true           | 0.0203               |
| G07      | 1                     | 1              | 0                     | -7.21807    | true           | 0.0229               |
| G08      | 2                     | 2              | 0                     | -10.661     | true           | 0.0165               |
| G09      | 1                     | 0              | 0                     | -5.17018    | true           | 0.0249               |
| G10      | 2                     | 1              | 0                     | -6.97709    | true           | 0.0296               |
| G11      | 1                     | 1              | 0                     | -6.33921    | true           | 0.0237               |
| G12      | 2                     | 1              | 0                     | -7.2289     | true           | 0.0236               |
| G13      | 1                     | 0              | 1                     | -8.26976    | true           | 0.00342              |
| G14      | 1                     | 0              | 1                     | -6.33634    | true           | 0.00431              |
| G15      | 0                     | 4              | 3                     | -5.20708    | true           | 0.00504              |
| G16      | 1                     | 4              | 1                     | -8.60851    | true           | 0.000342             |
| G17      | 1                     | 0              | 1                     | -4.6823     | true           | 0.000893             |
| G18      | 1                     | 0              | 1                     | -7.27629    | true           | 0.00412              |
| G19      | 2                     | 1              | 0                     | -3.18426    | true           | 0.0459               |
| G20      | 2                     | 1              | 0                     | -6.19844    | true           | 0.0549               |
| G21      | 2                     | 1              | 0                     | -4.72612    | true           | 0.0541               |
| G22      | 1                     | 4              | 2                     | -3.67127    | true           | 0.0443               |
| G23      | 3                     | 4              | 0                     | -2.89167    | true           | 0.0211               |

|            |   |   |   |          |      |        |
|------------|---|---|---|----------|------|--------|
| <b>G24</b> | 1 | 1 | 0 | -3.07058 | true | 0.0218 |
| <b>G25</b> | 2 | 1 | 0 | -2.25817 | true | 0.0155 |
| <b>G26</b> | 1 | 1 | 0 | -8.09596 | true | 0.0508 |

ADME\_Solubility\_Level: 0 (Extremely low); 1 (No, very low, but possible); 2 (Yes, low); 3 (Yes, good); 4 (Yes, optimal); 5 (No, too soluble); 6 (Warning: molecules with one or more unknown AlogP98 types).

ADME\_BBB\_Level: 0 (Very high penetrant); 1 (High); 2 (Medium); 3 (Low); 4 (Undefined).

ADME\_Absorption\_Level: 0 (Good absorption); 1 (Moderate absorption); 2 (Low absorption); 3 (Very low absorption).

EXT\_Hepatotoxic: < -0.4095: non-toxic; > -0.4095: inhibitor.

EXT\_PPB\_Prediction: plasma protein binding ability, false:  $\geq 90\%$ ; true:  $\leq 90\%$ .

Toxicity Probability: 0.0-0.30 (Low); 0.30-0.70 (Medium); 0.70-1.0 (High).

## Appendix: spectroscopic charts of the target compounds

Chemical Formula:  $C_{17}H_{11}F_3N_2O_2$   
 MS (ESI): calcd for 333.1 ( $[M+H]^+$ )

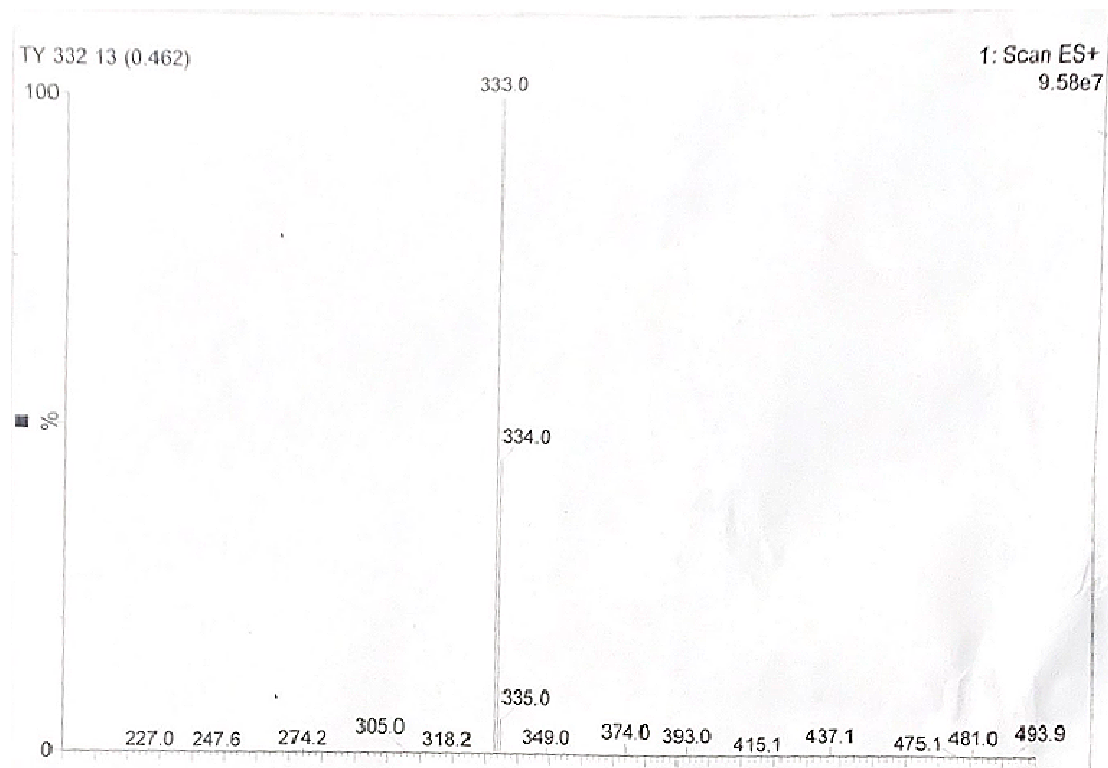

Figure S9. MS (ESI) of the target compound F01.

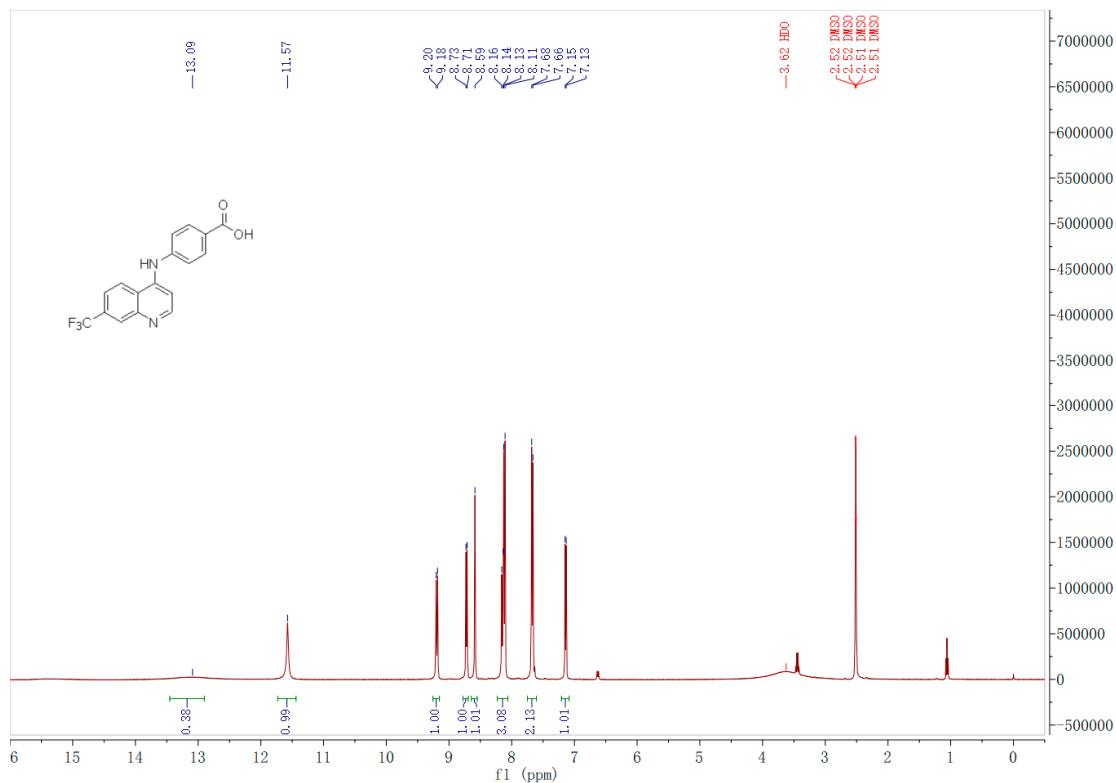

Figure S10.  $^1H$  NMR spectra of the target compound F01.

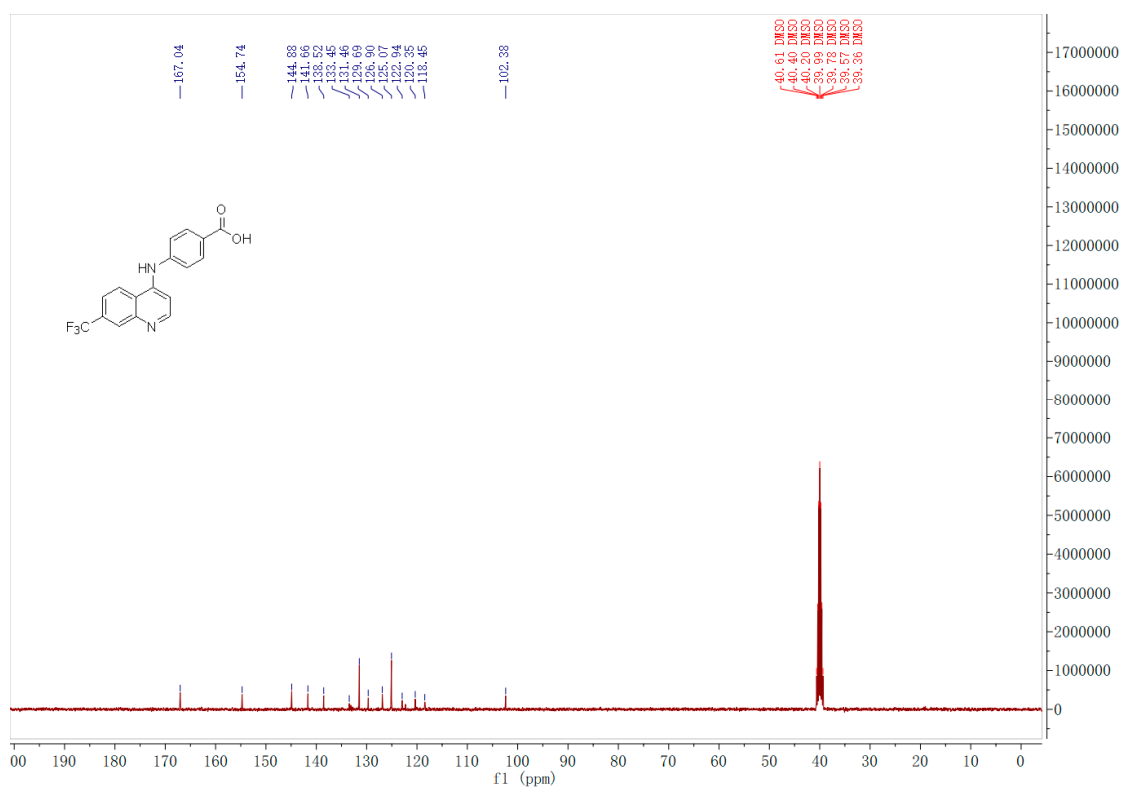

Figure S11.  $^{13}\text{C}$  NMR spectra of the target compound F01.

Chemical Formula:  $\text{C}_{16}\text{H}_{12}\text{N}_2\text{O}_2$   
 MS (ESI): calcd for 265.1 ( $[\text{M}+\text{H}]^+$ )

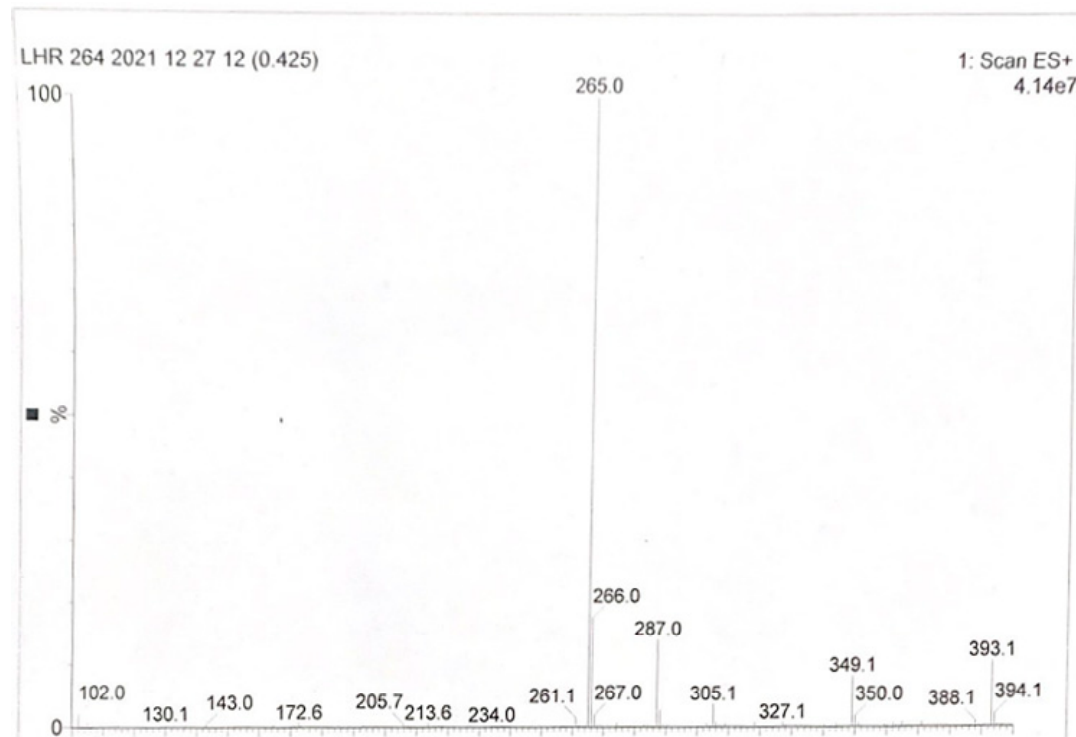

Figure S12. MS (ESI) of the target compound F02.



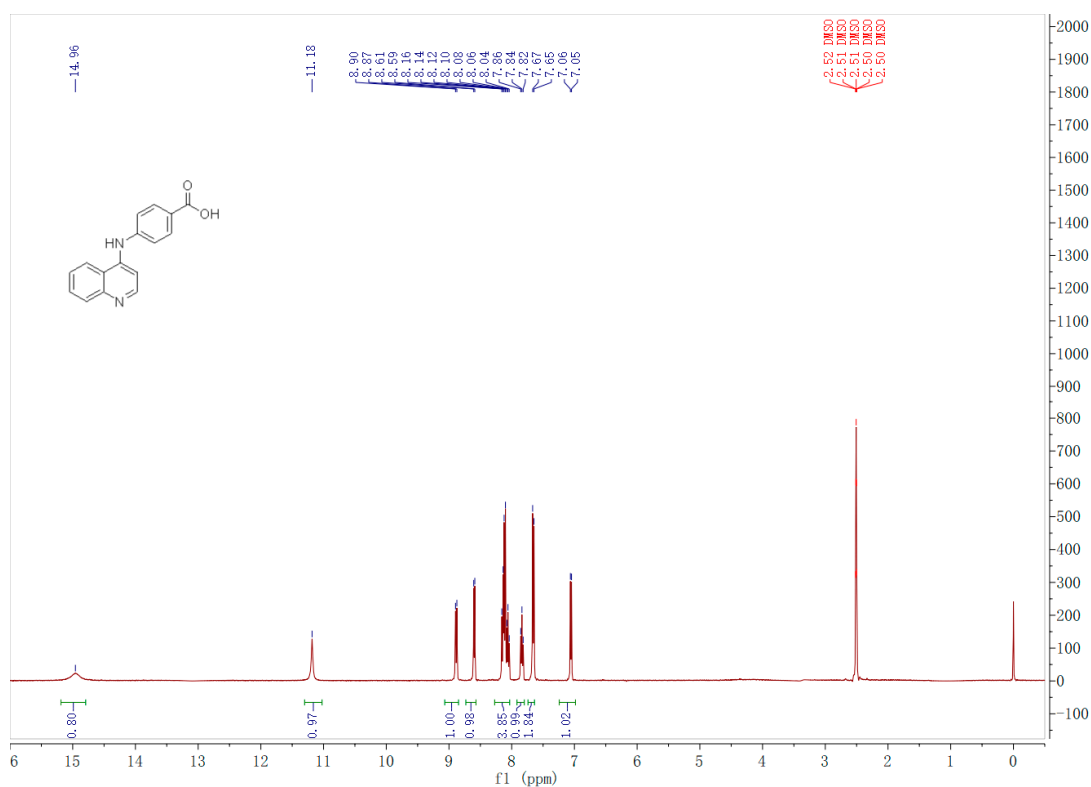Figure S13. <sup>1</sup>H NMR spectra of the target compound F02.

Chemical Formula: C<sub>17</sub>H<sub>14</sub>N<sub>2</sub>O<sub>2</sub>  
 MS (ESI): calcd for 279.1 ([M+H]<sup>+</sup>)

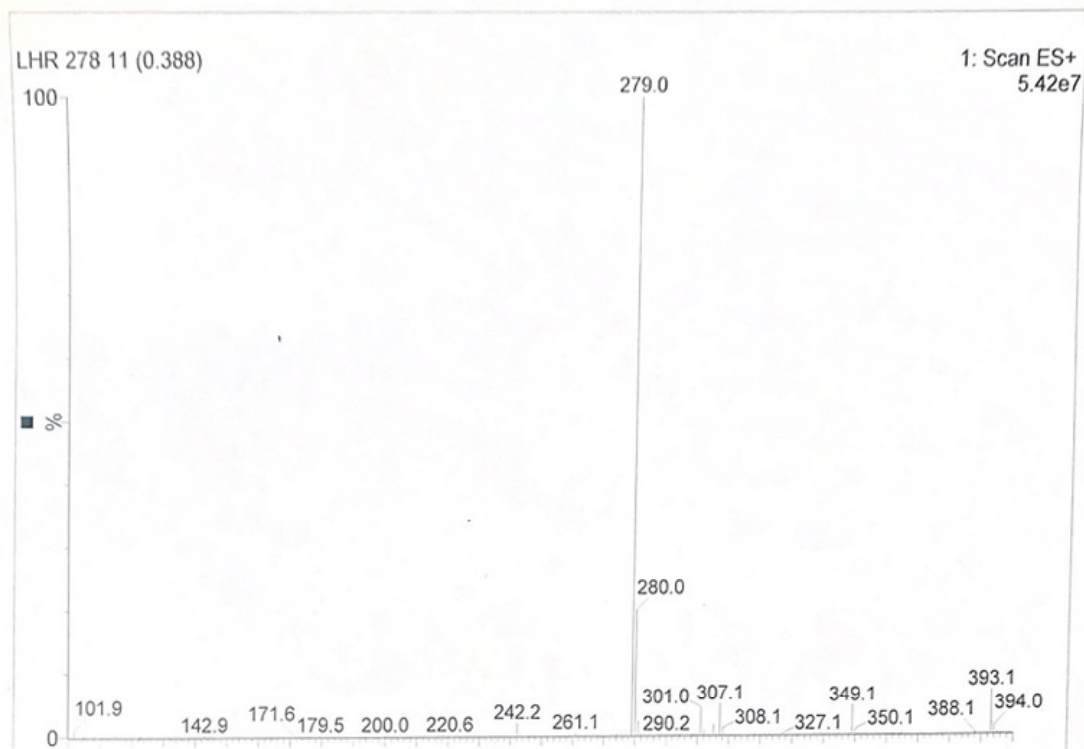

Figure S14. MS (ESI) of the target compound F03.

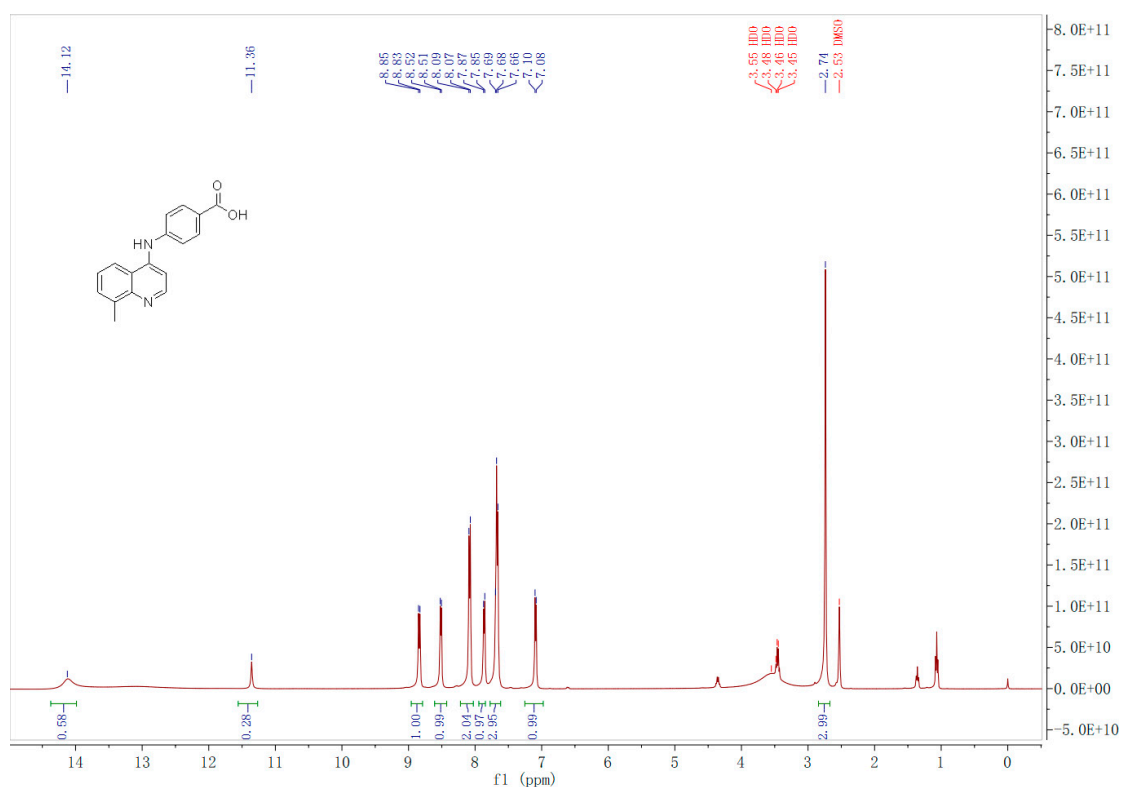Figure S15. <sup>1</sup>H NMR spectra of the target compound F03.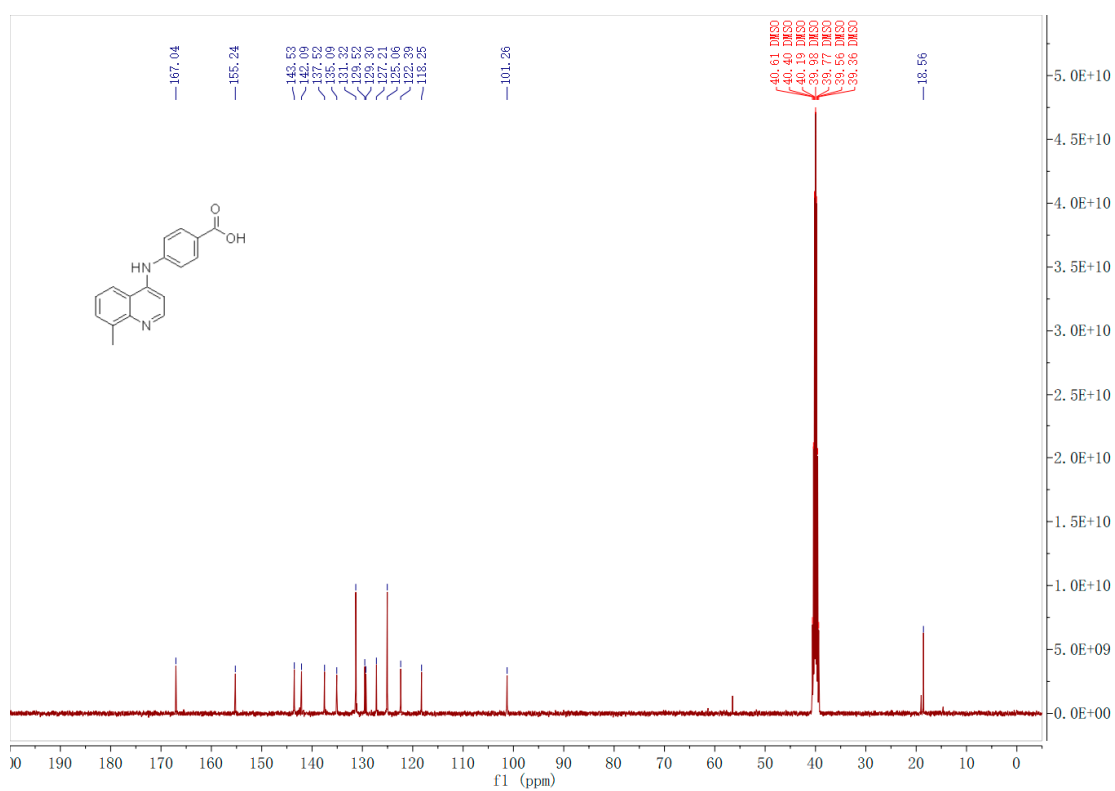Figure S16. <sup>13</sup>C NMR spectra of the target compound F03.

Chemical Formula:  $C_{17}H_{14}N_2O_2$   
 MS (ESI): calcd for 279.1 ( $[M+H]^+$ )

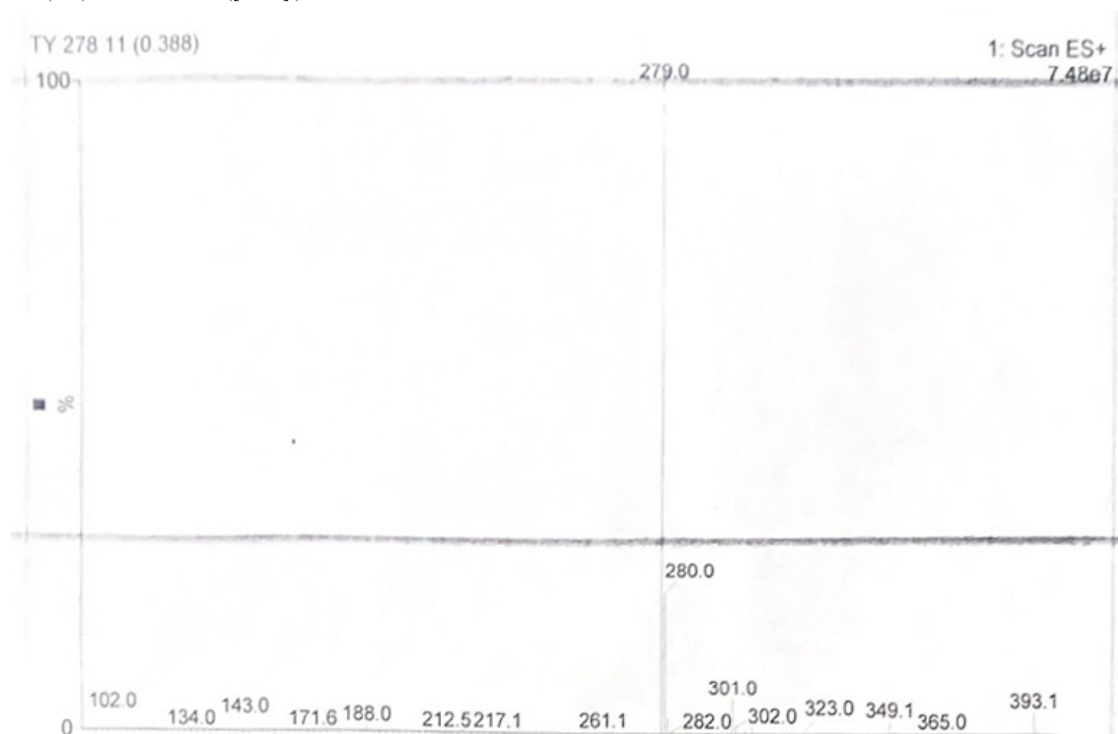

**Figure S17.** MS (ESI) of the target compound **F04**.

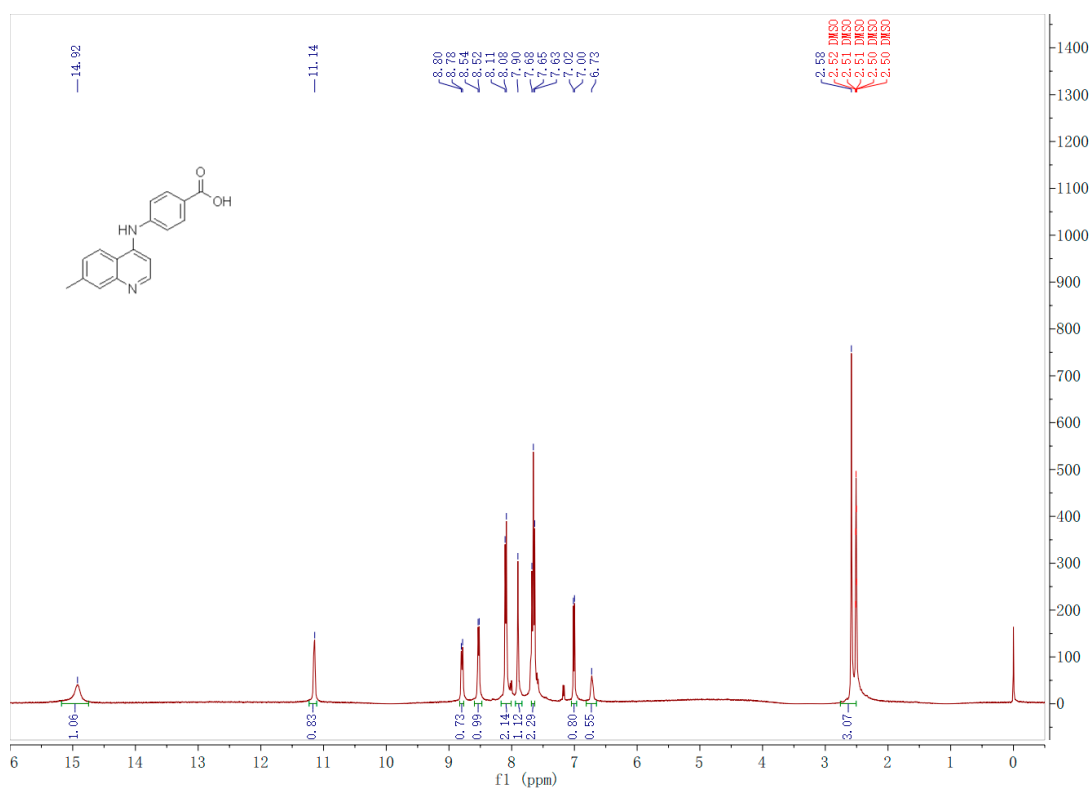

**Figure S18.**  $^1H$  NMR spectra of the target compound **F04**.

Chemical Formula: C<sub>16</sub>H<sub>11</sub>N<sub>3</sub>O<sub>4</sub>  
MS (ESI): calcd for 310.1 ([M+H]<sup>+</sup>)

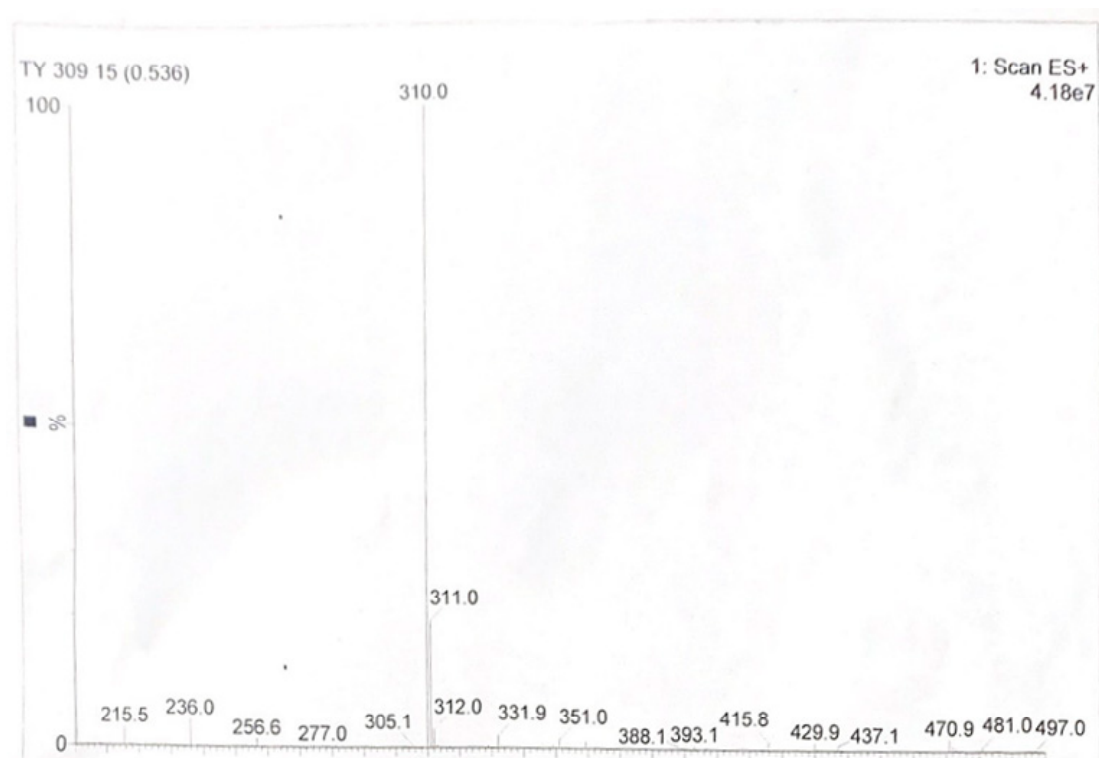

**Figure S19.** MS (ESI) of the target compound F05.

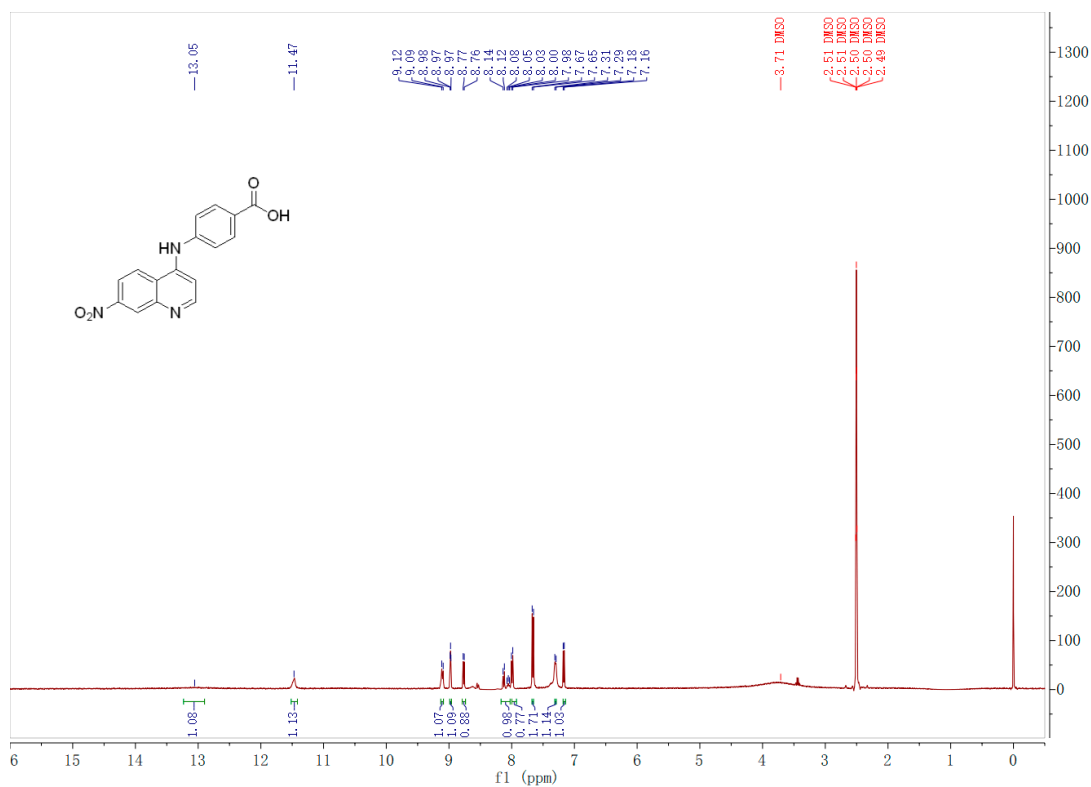

**Figure S20.**  $^1\text{H}$  NMR spectra of the target compound **F05**.

Chemical Formula:  $C_{16}H_{11}ClN_2O_2$   
MS (ESI): calcd for 299.1 ( $[M+H]^+$ )

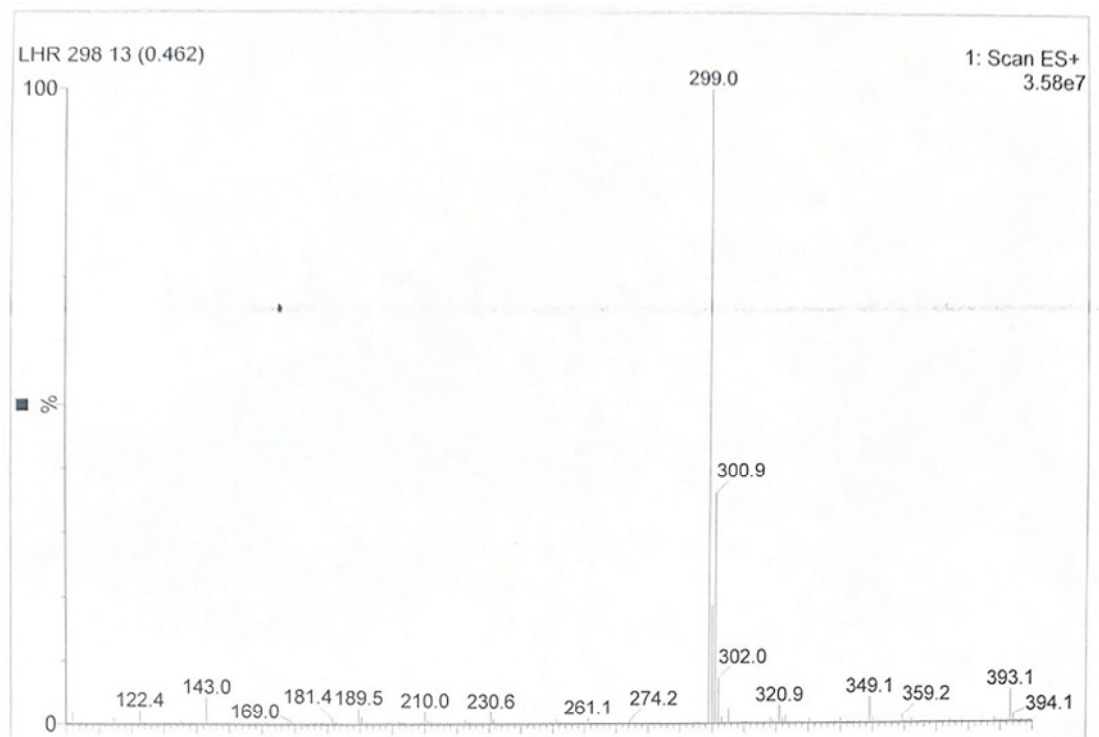

Figure S21. MS (ESI) of the target compound F06.

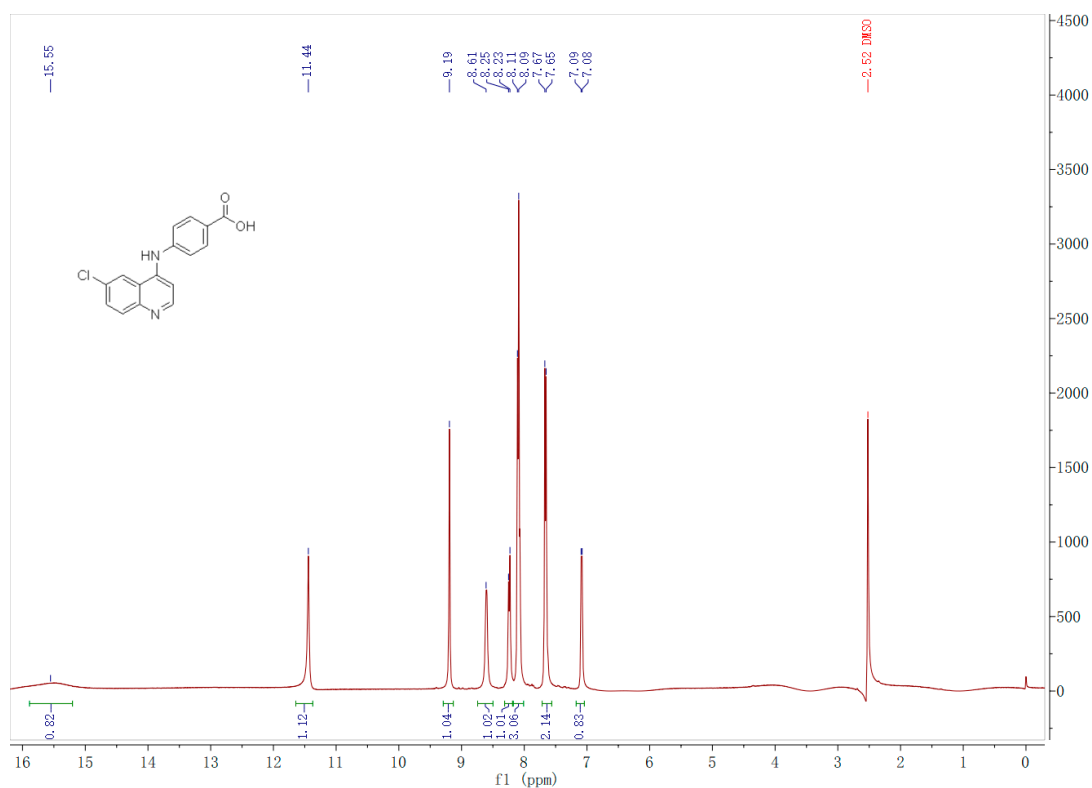

Figure S22.  $^1H$  NMR spectra of the target compound F06.

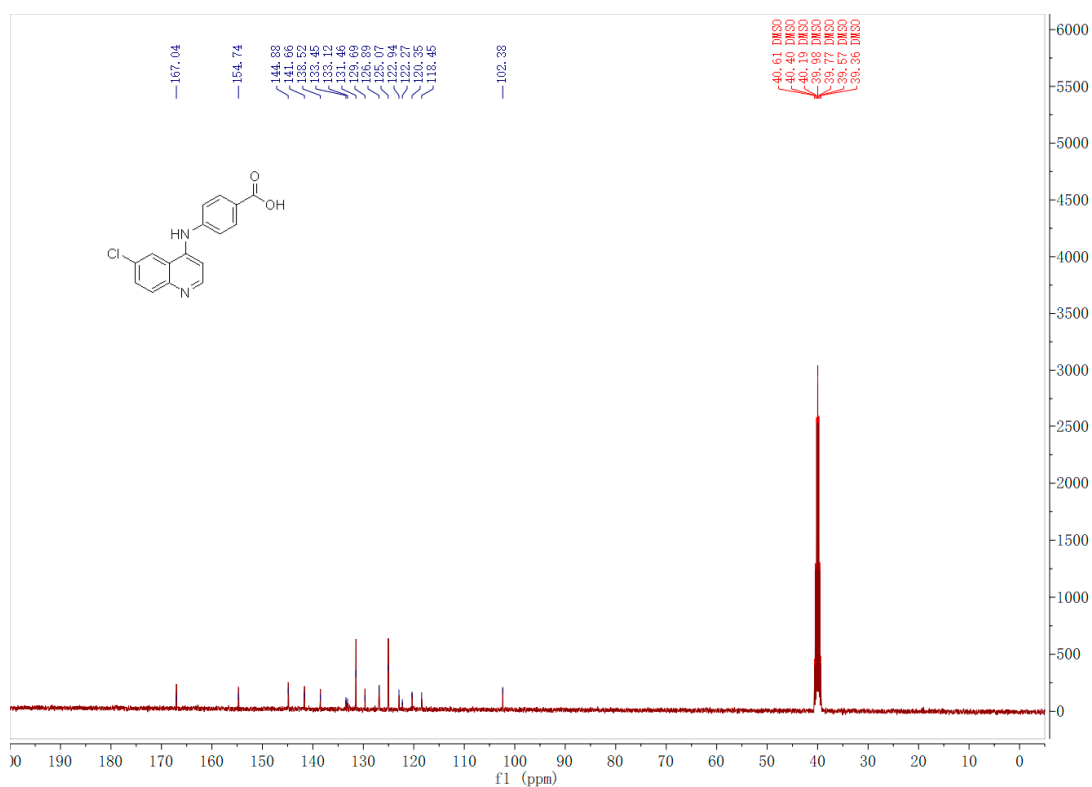Figure S23. <sup>13</sup>C NMR spectra of the target compound F06.

Chemical Formula: C<sub>16</sub>H<sub>11</sub>BrN<sub>2</sub>O<sub>2</sub>  
 MS (ESI): calcd for 342.0 ([M+H]<sup>+</sup>)

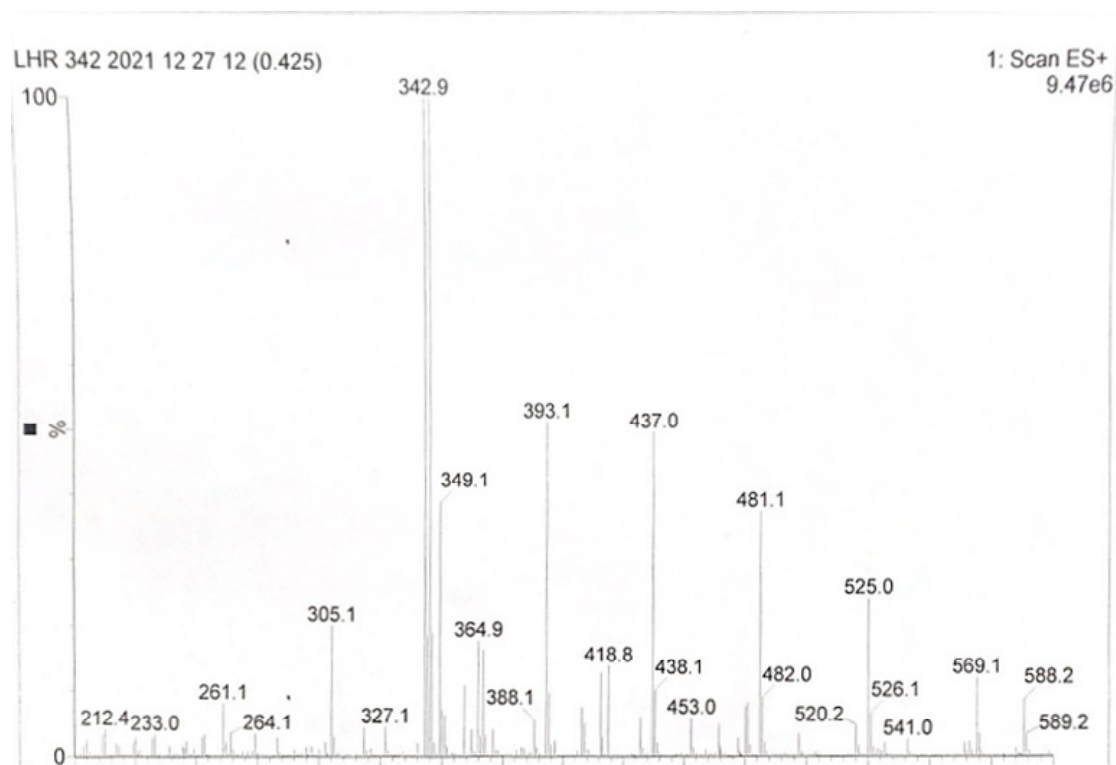

Figure S24. MS (ESI) of the target compound F07.

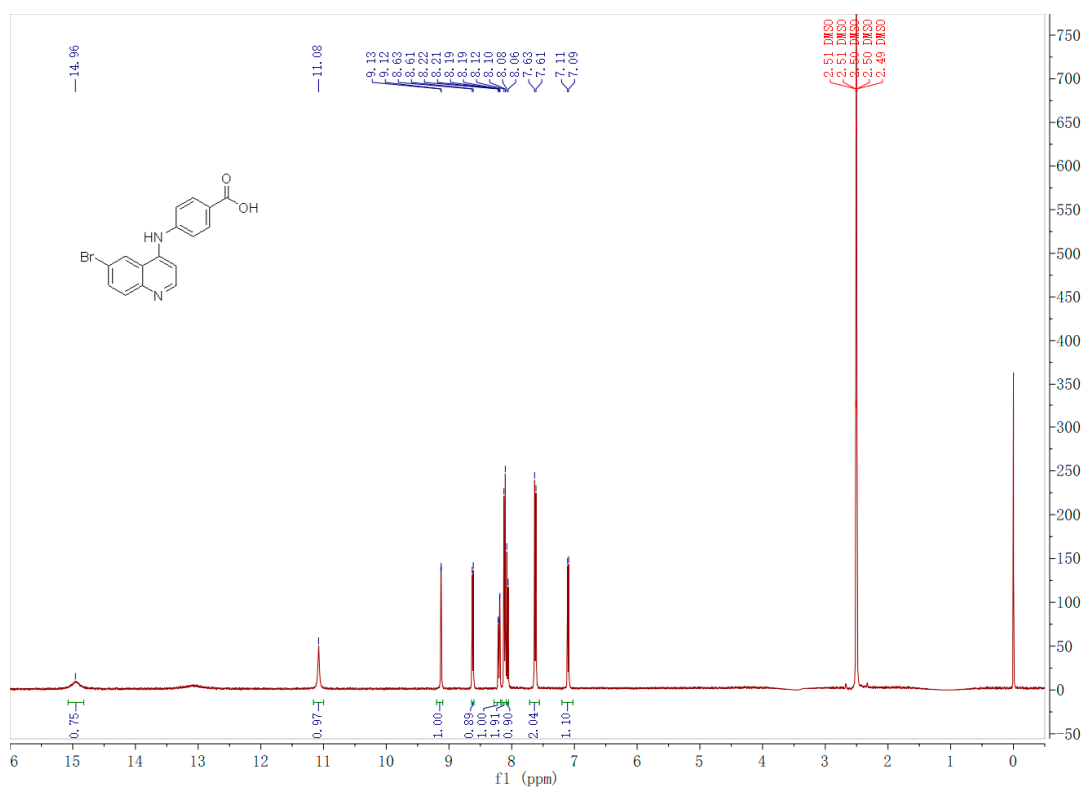Figure S25. <sup>1</sup>H NMR spectra of the target compound F07.

Chemical Formula: C<sub>17</sub>H<sub>11</sub>F<sub>3</sub>N<sub>2</sub>O<sub>2</sub>  
 MS (ESI): calcd for 333.1 ([M+H]<sup>+</sup>)

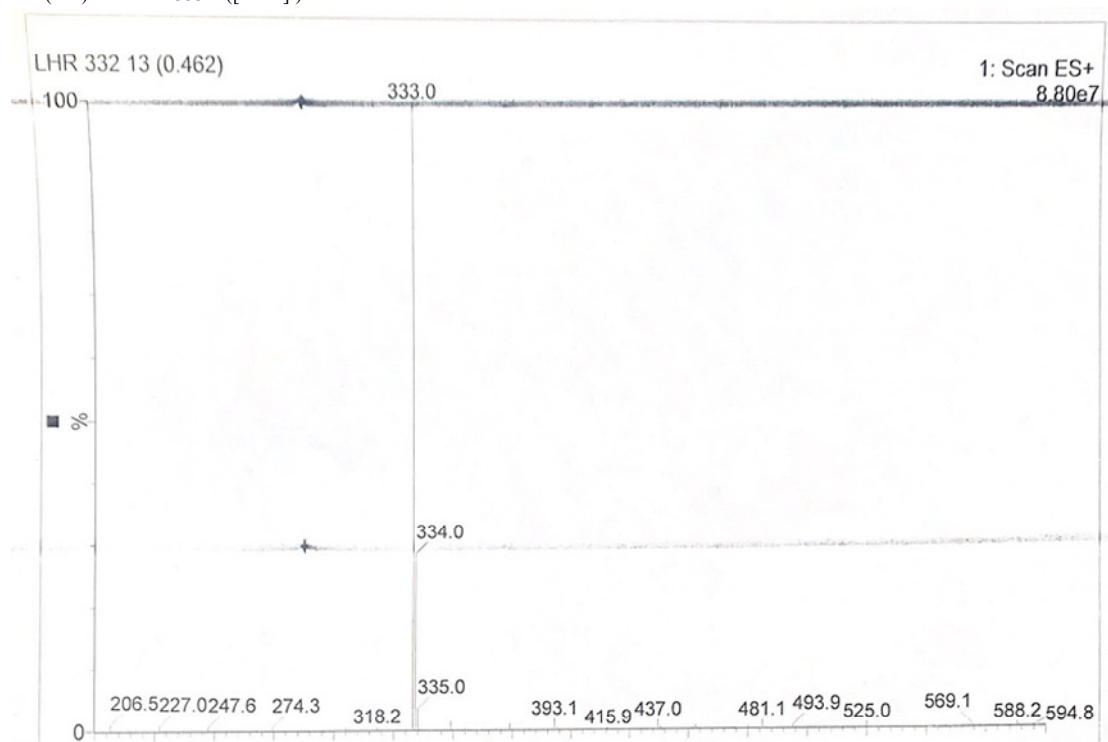

Figure S26. MS (ESI) of the target compound F08.

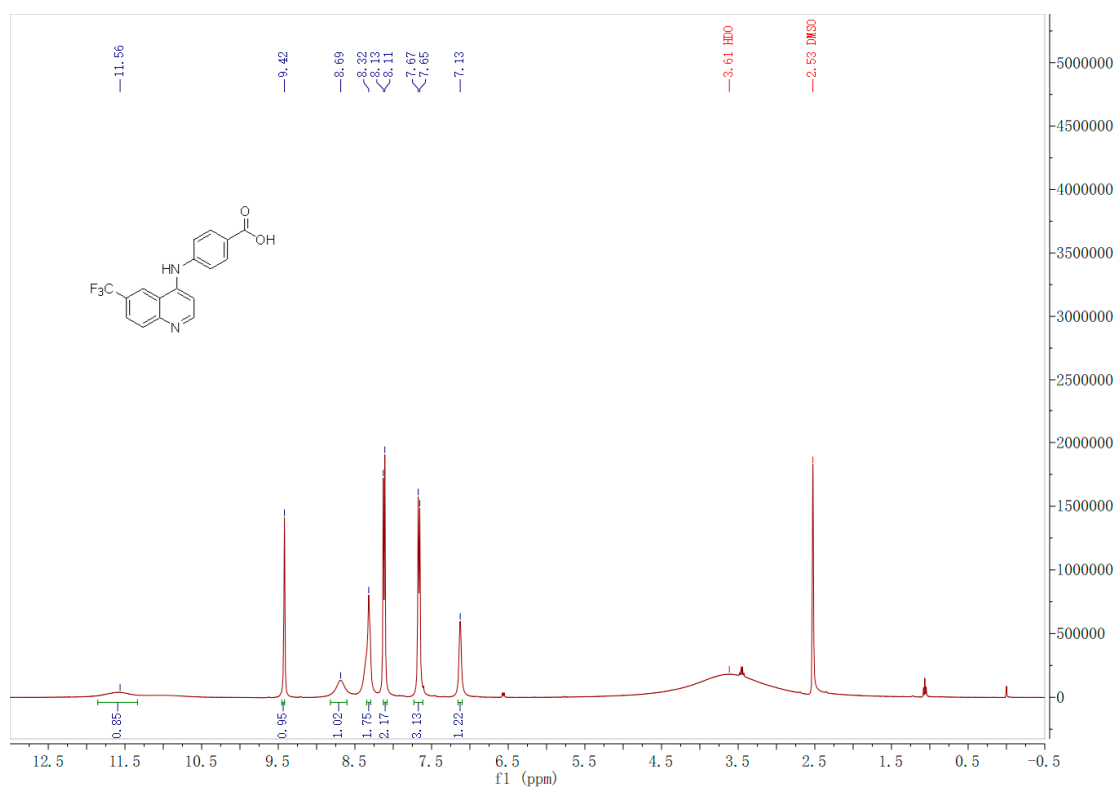Figure S27. <sup>1</sup>H NMR spectra of the target compound F08.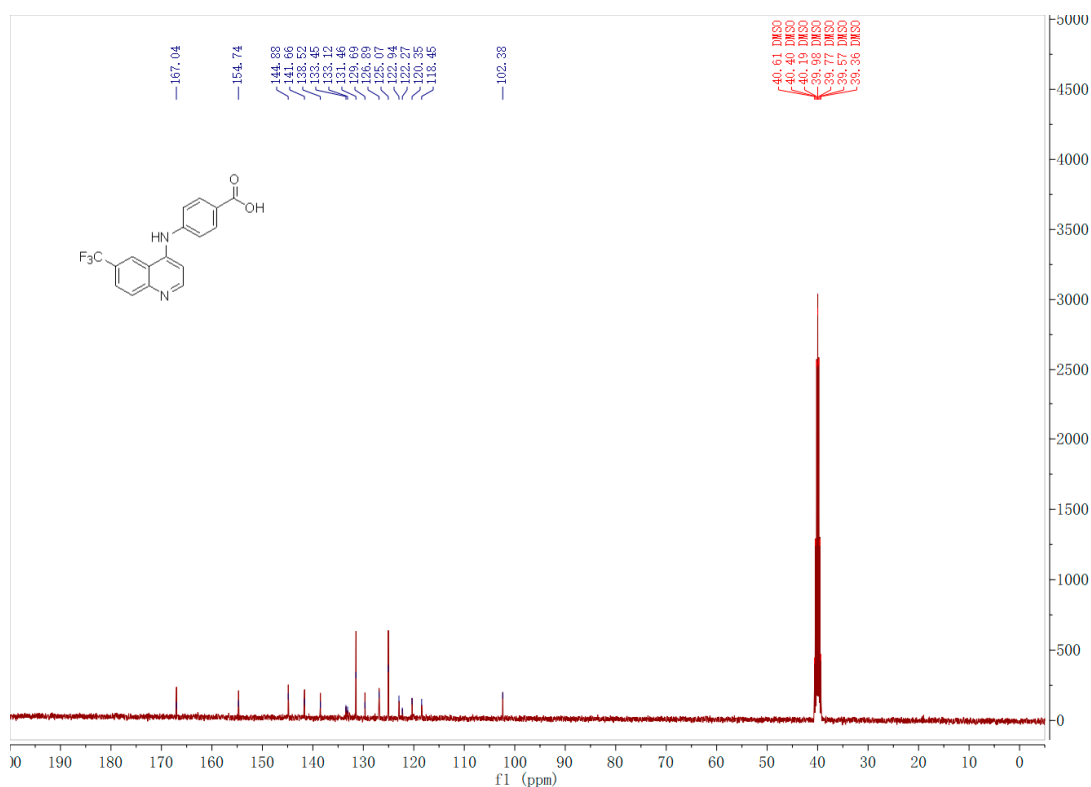Figure S28. <sup>13</sup>C NMR spectra of the target compound F08.



Chemical Formula:  $C_{17}H_{11}F_3N_2O_3$   
 MS (ESI): calcd for 349.1 ( $[M+H]^+$ )

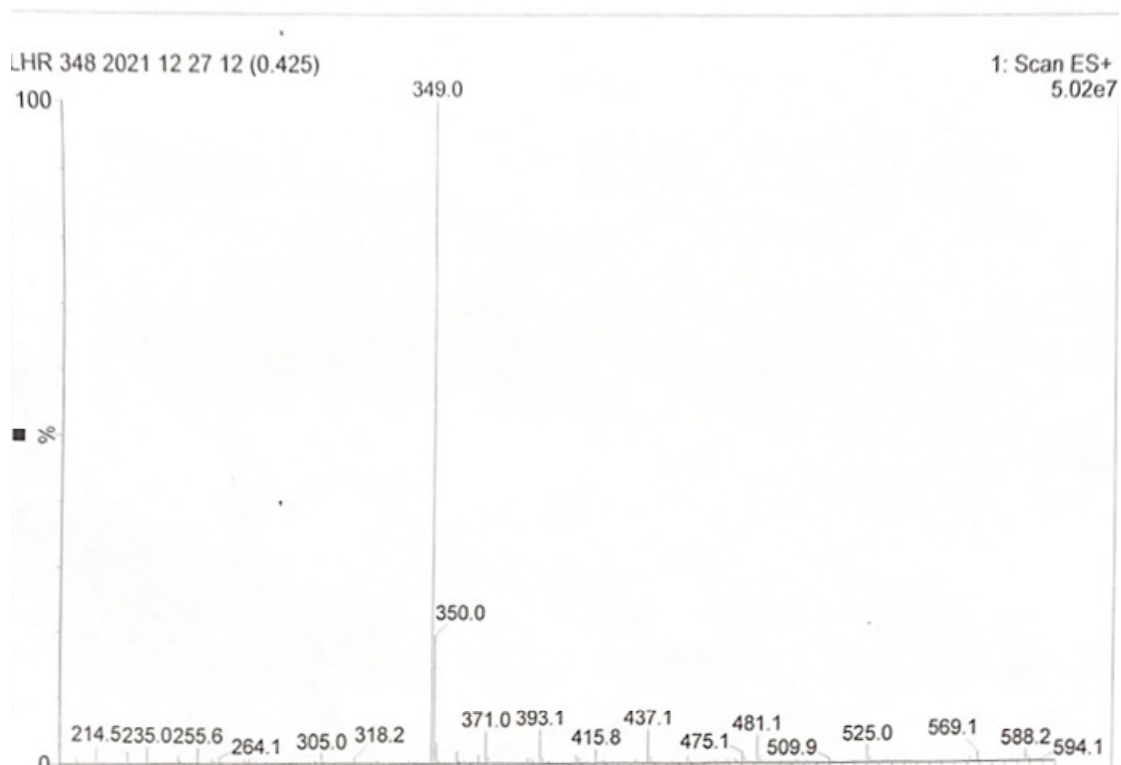

Figure S29. MS (ESI) of the target compound F09.

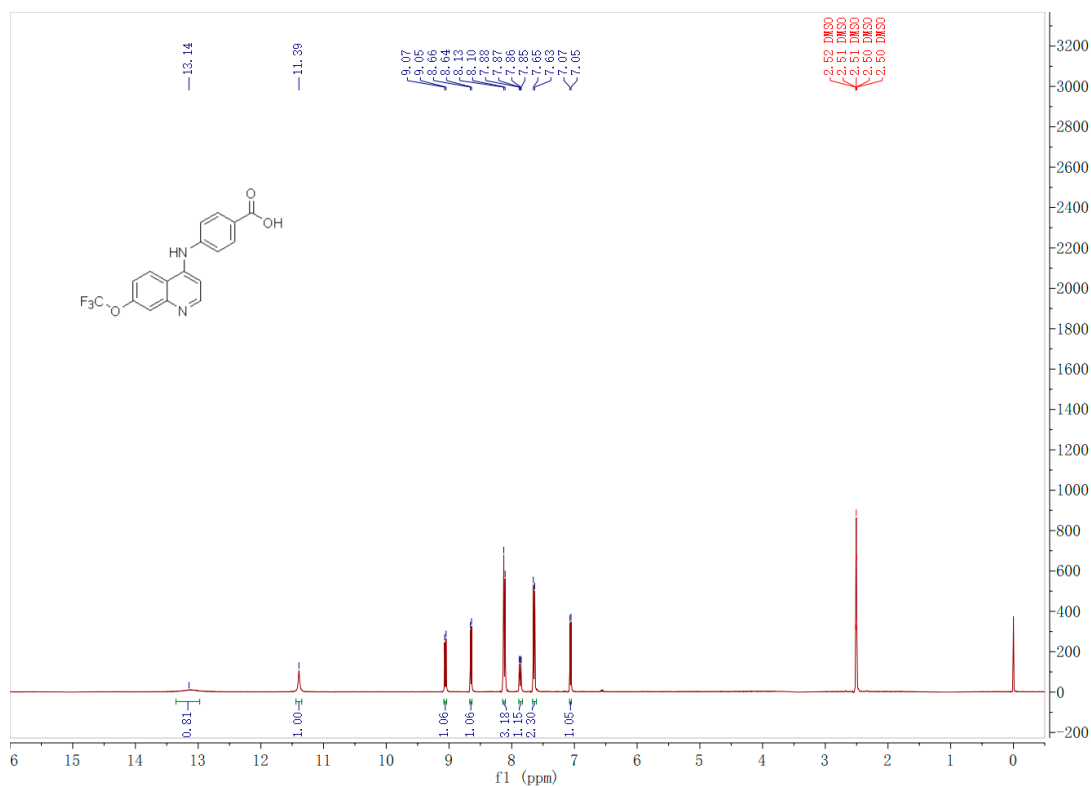

Figure S30.  $^1H$  NMR spectra of the target compound F09.

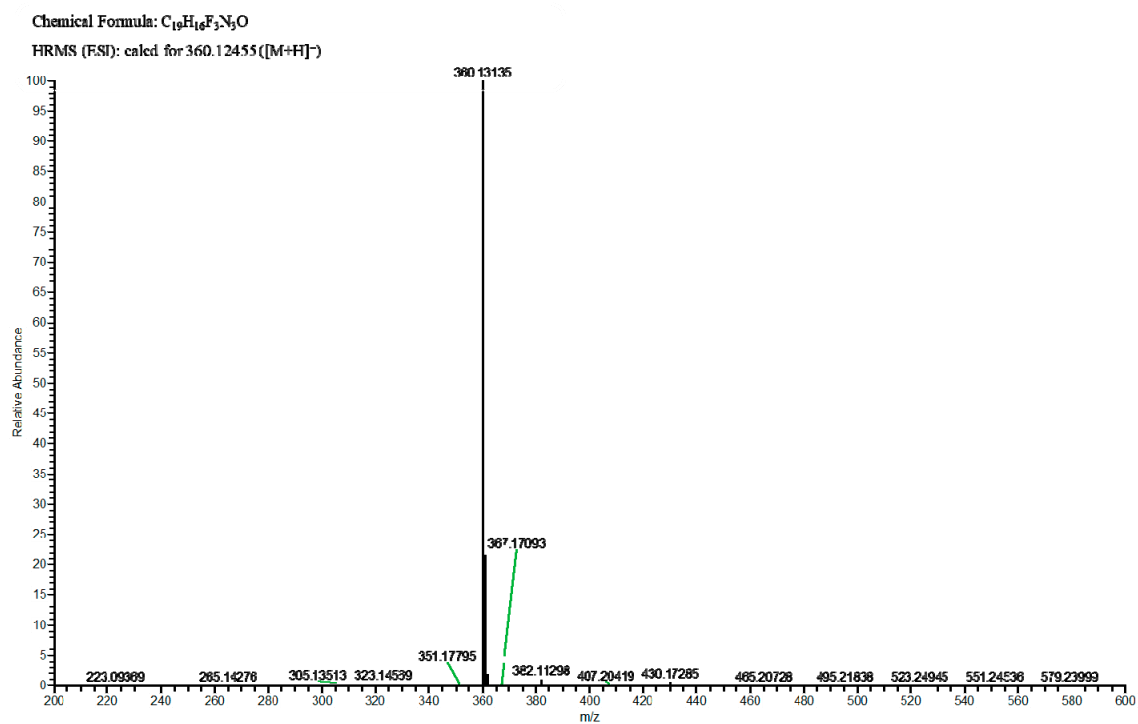

Figure S31. HRMS (ESI) of the target compound G01.

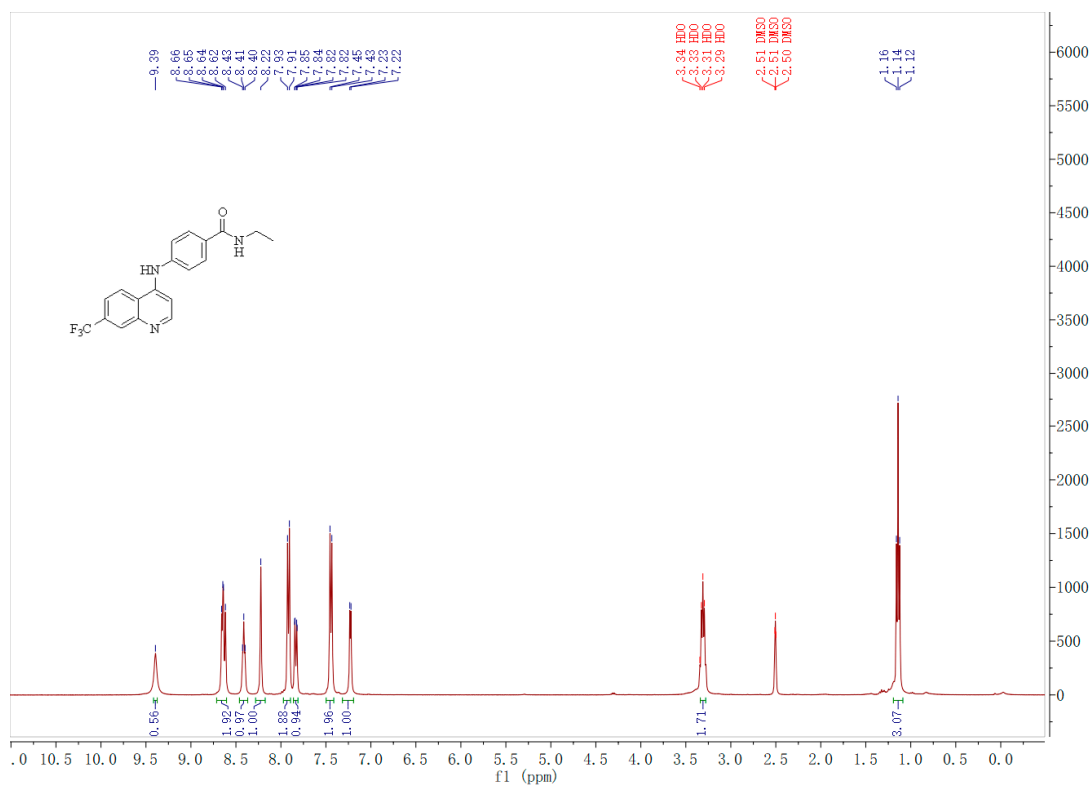Figure S32.  $^1H$  NMR spectra of the target compound G01.

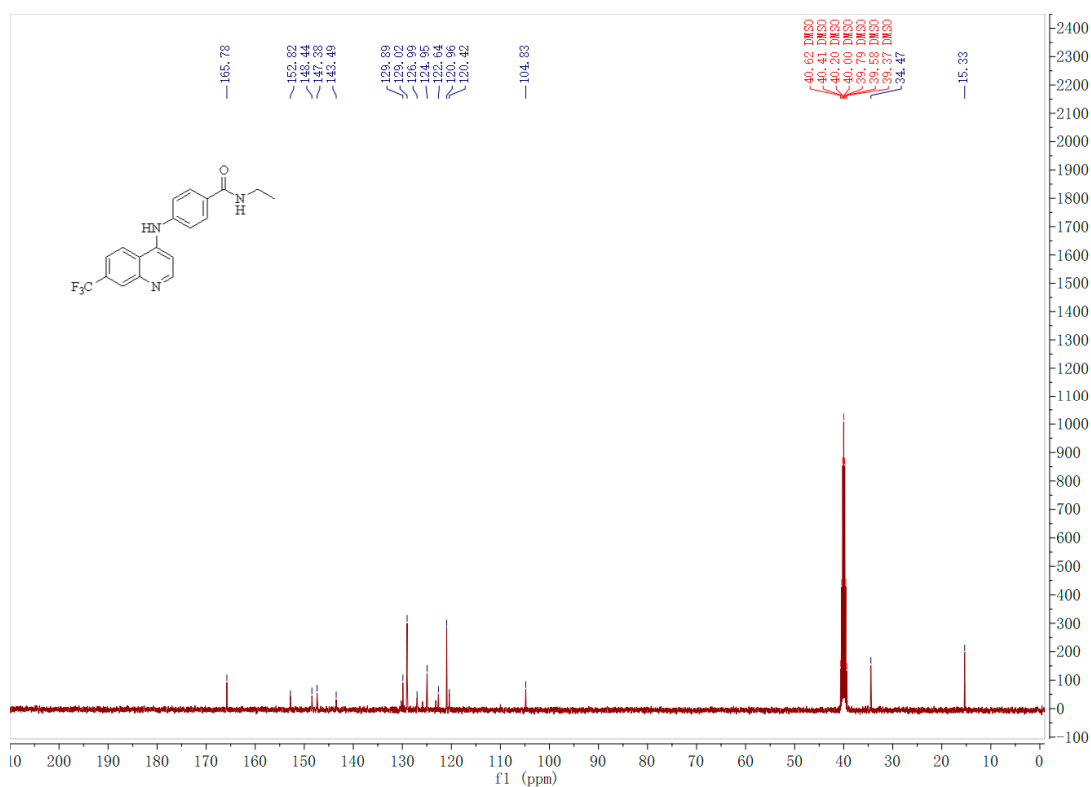Figure S33. <sup>13</sup>C NMR spectra of the target compound G01.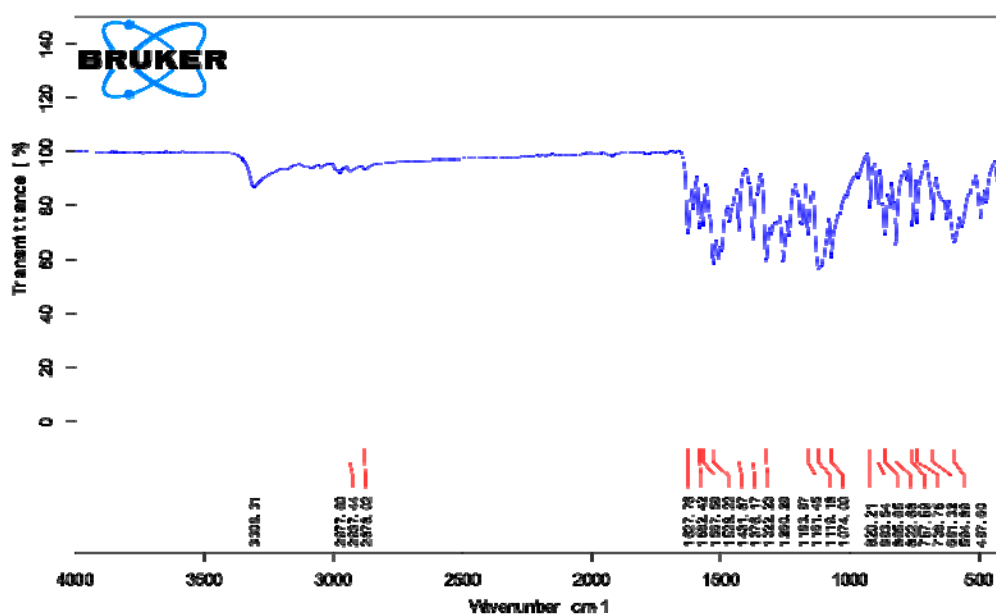

Figure S34. IR spectra of the target compound G01.

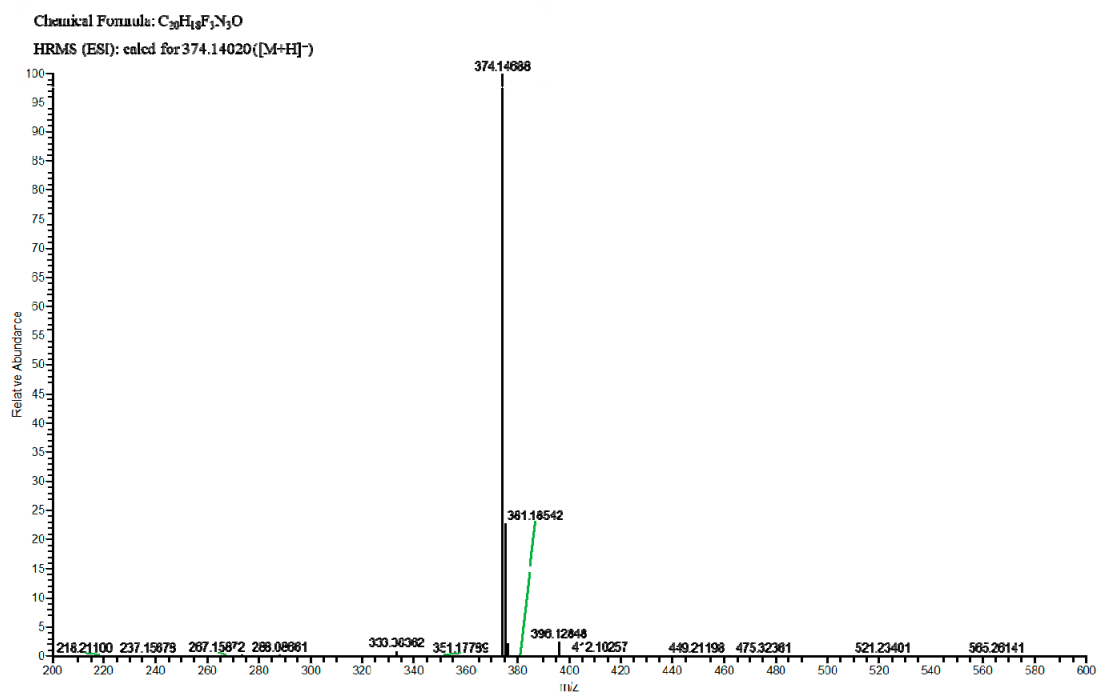

Figure S35. HRMS (ESI) of the target compound G02.

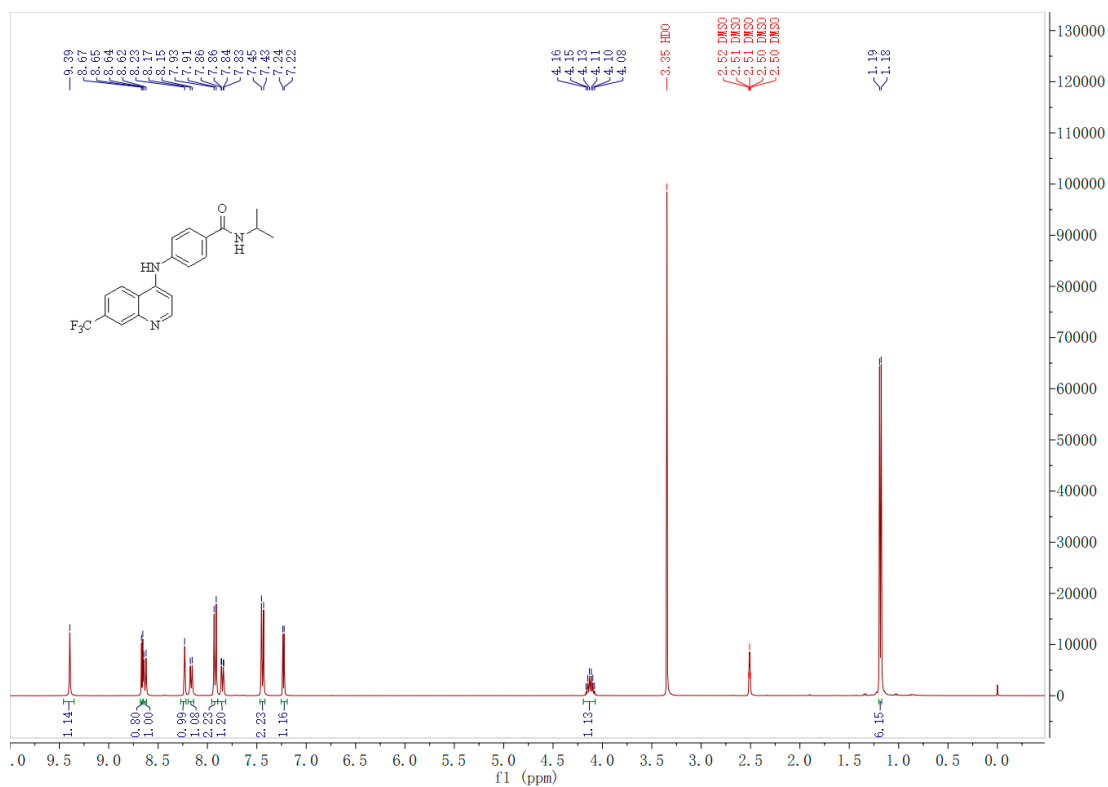Figure S36.  $^1H$  NMR spectra of the target compound G02.

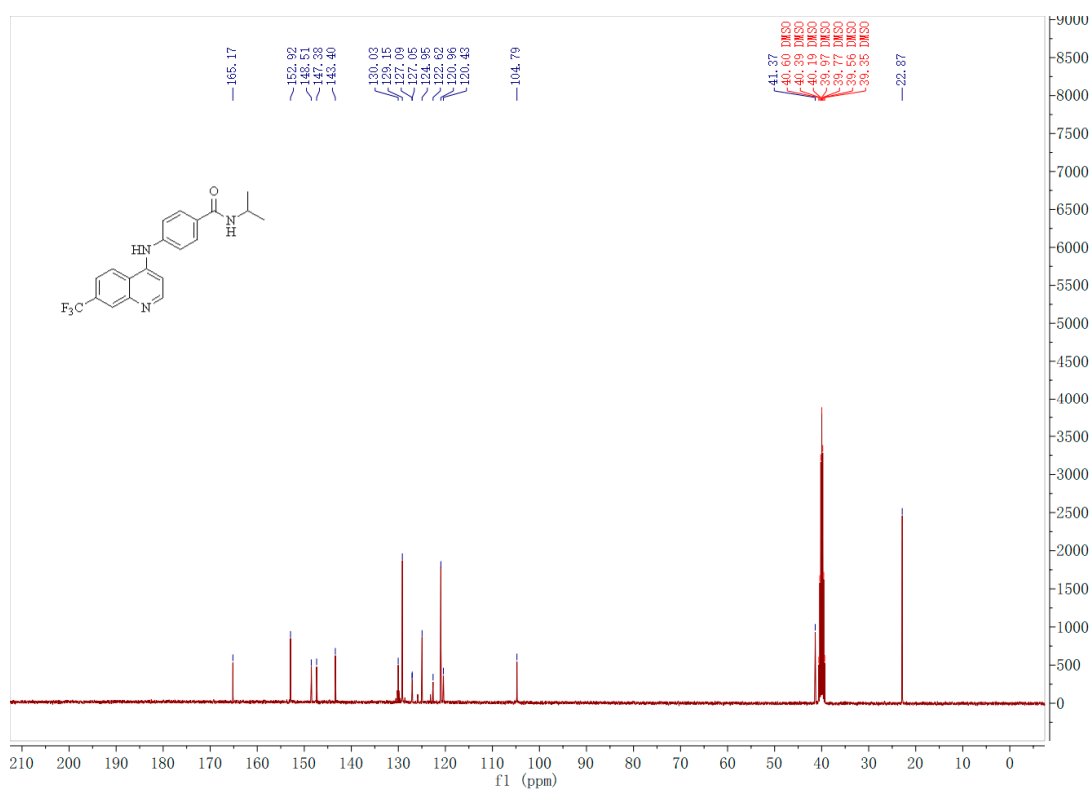Figure S37. <sup>13</sup>C NMR spectra of the target compound G02.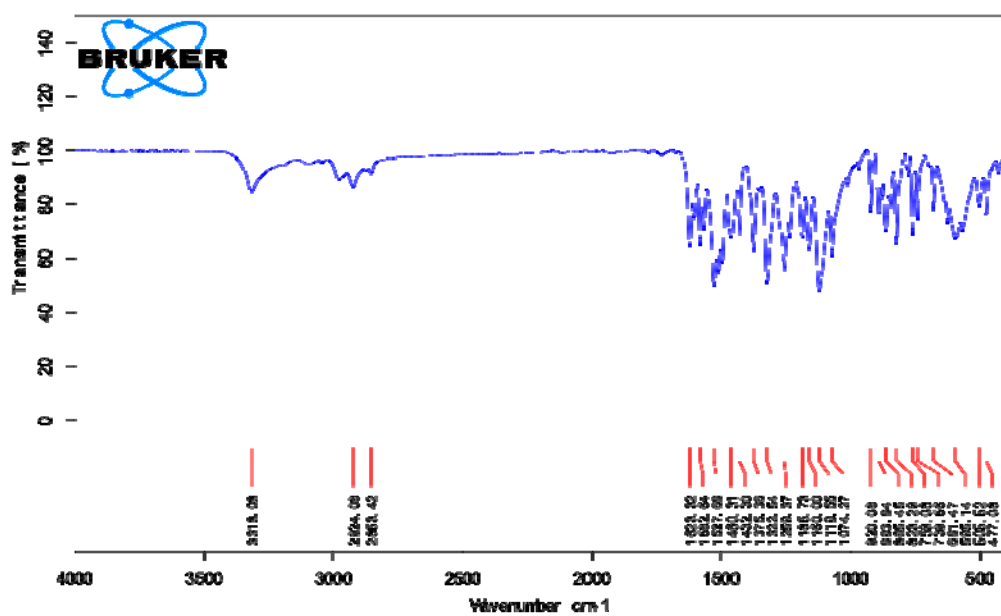

Figure S38. IR spectra of the target compound G02.

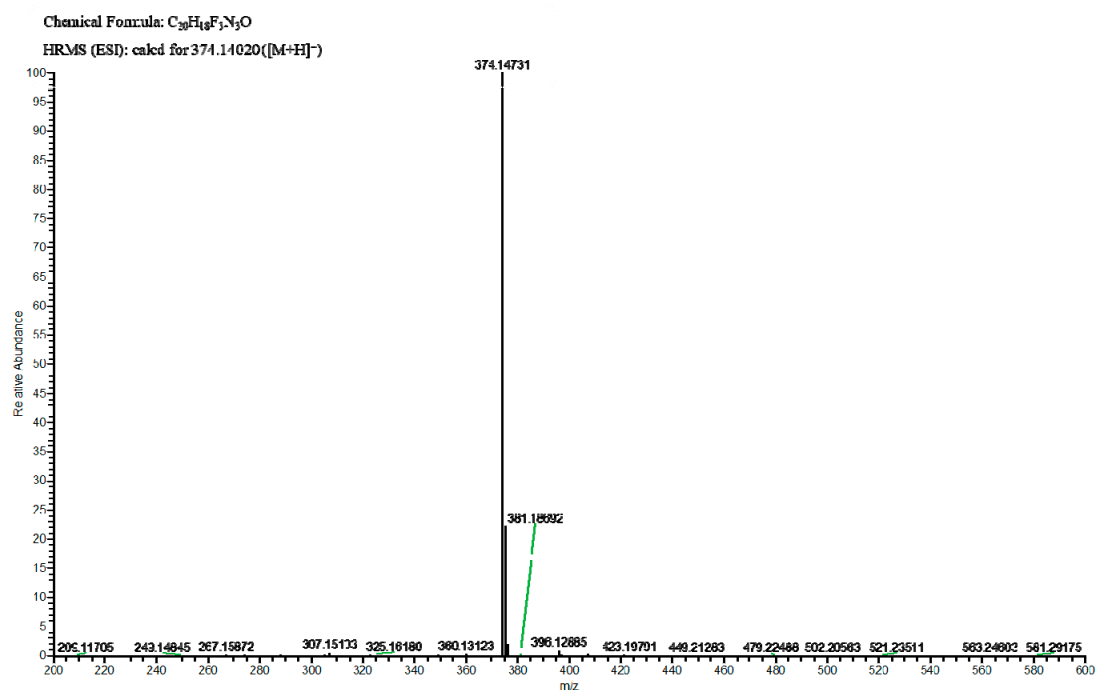

Figure S39. HRMS (ESI) of the target compound G03.

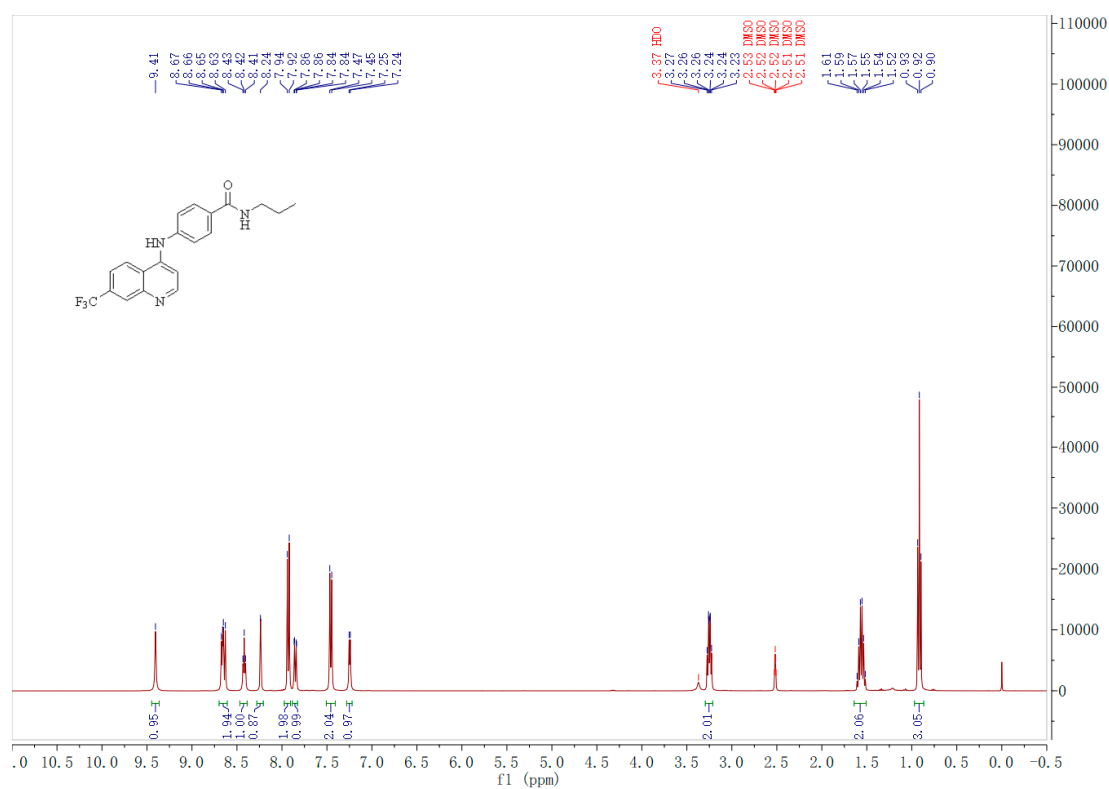Figure S40.  $^1H$  NMR spectra of the target compound G03.

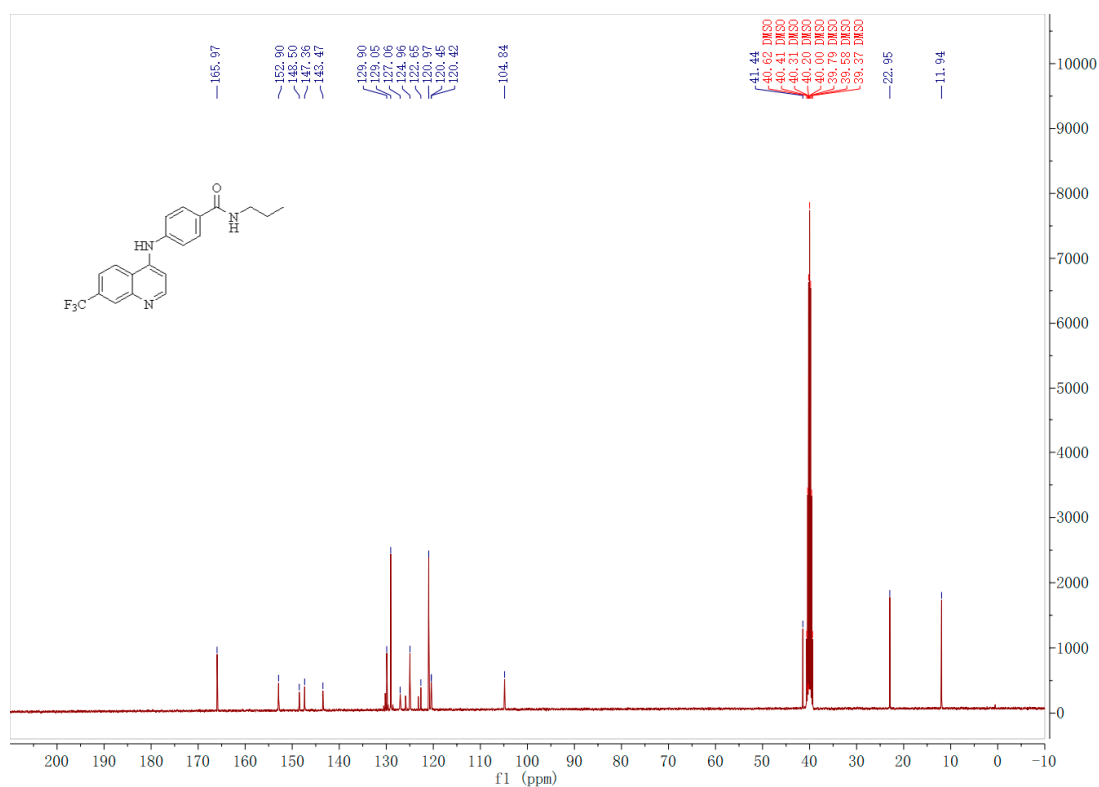Figure S41. <sup>13</sup>C NMR spectra of the target compound G03.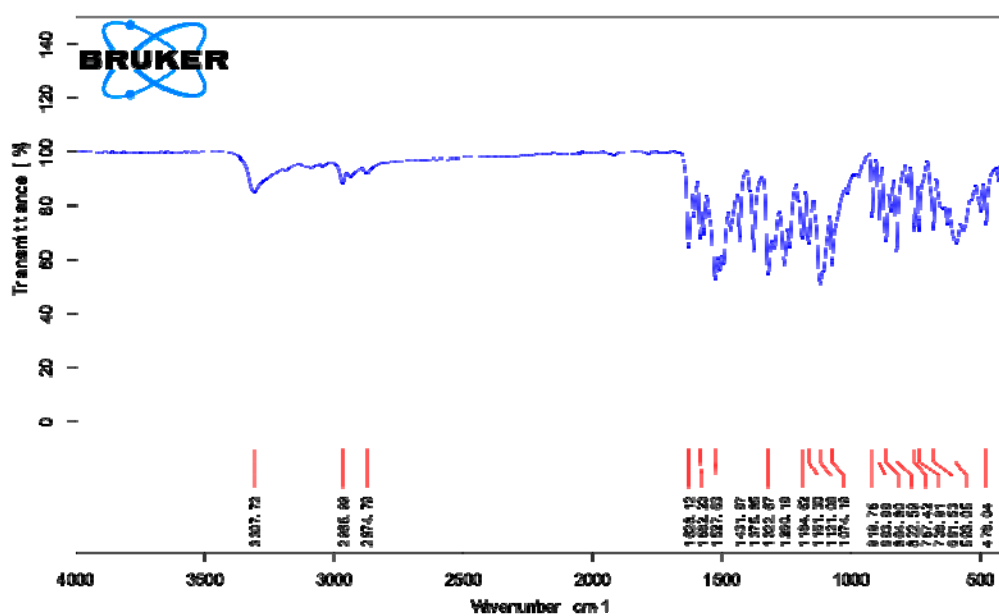

Figure S42. IR spectra of the target compound G03.

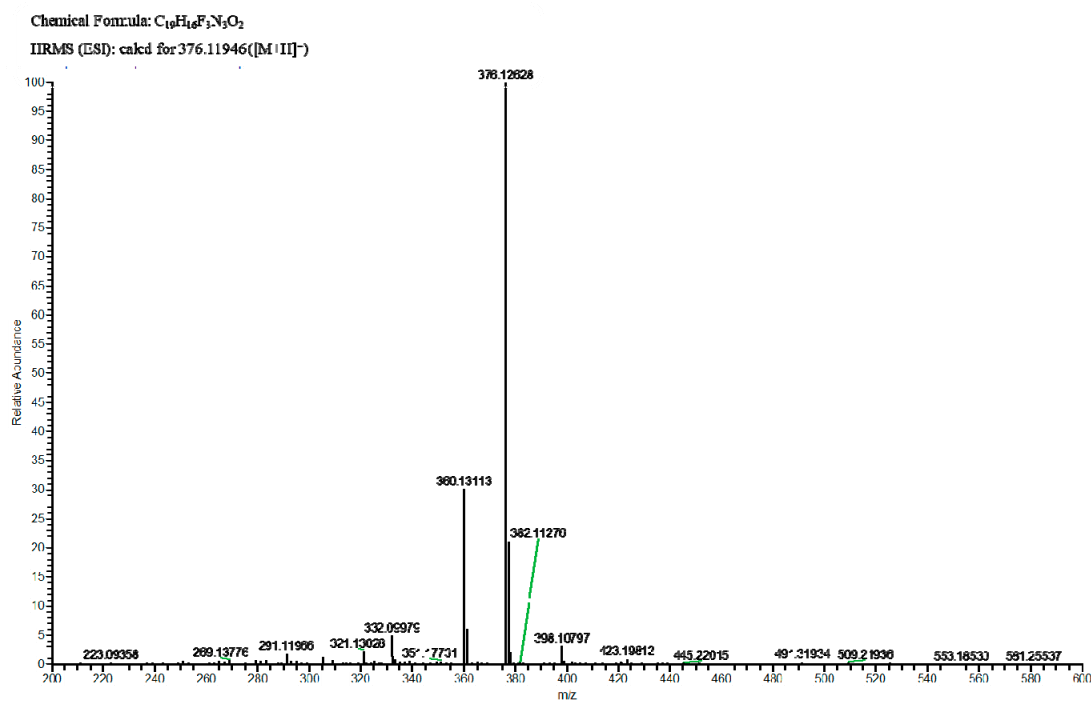

Figure S43. HRMS (ESI) of the target compound G04.

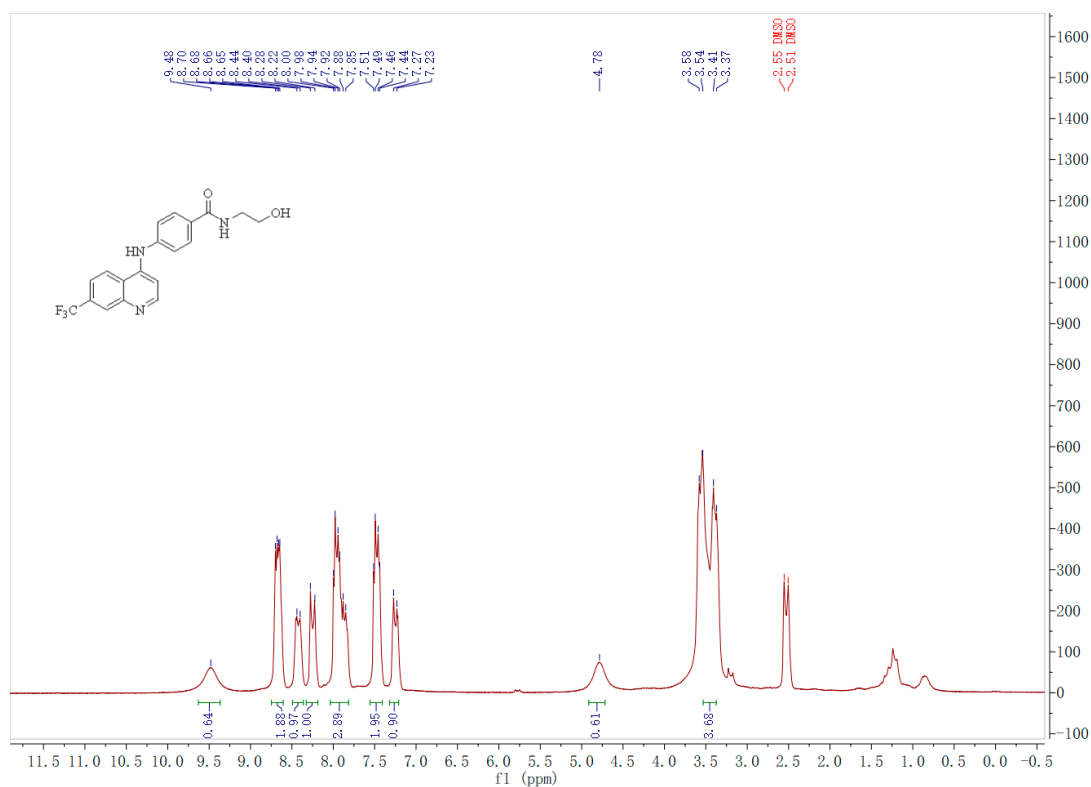Figure S44.  $^1H$  NMR spectra of the target compound G04.



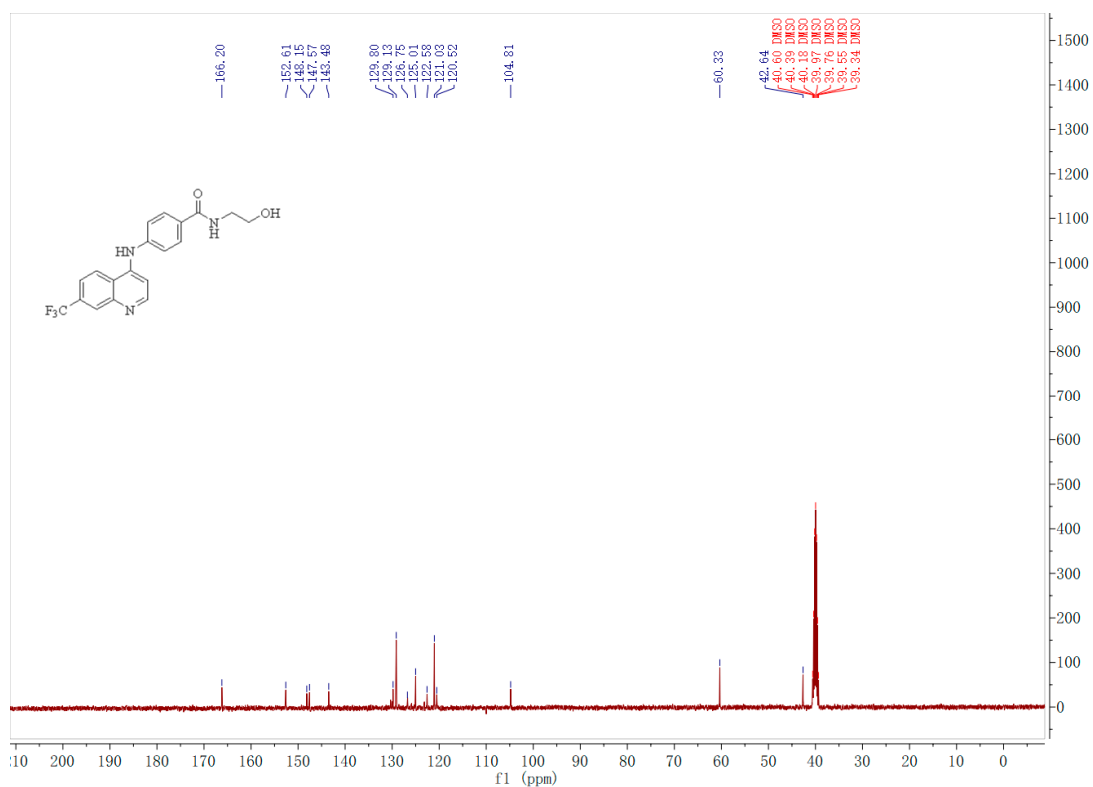Figure S45. <sup>13</sup>C NMR spectra of the target compound G04.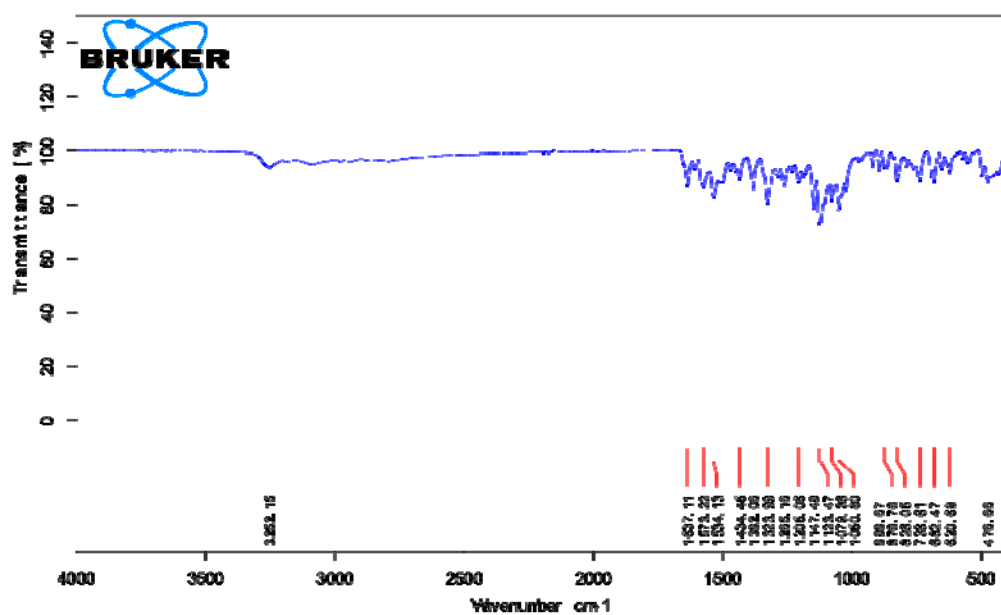

Figure S46. IR spectra of the target compound G04.

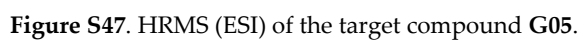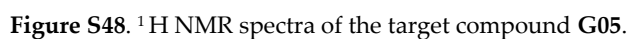

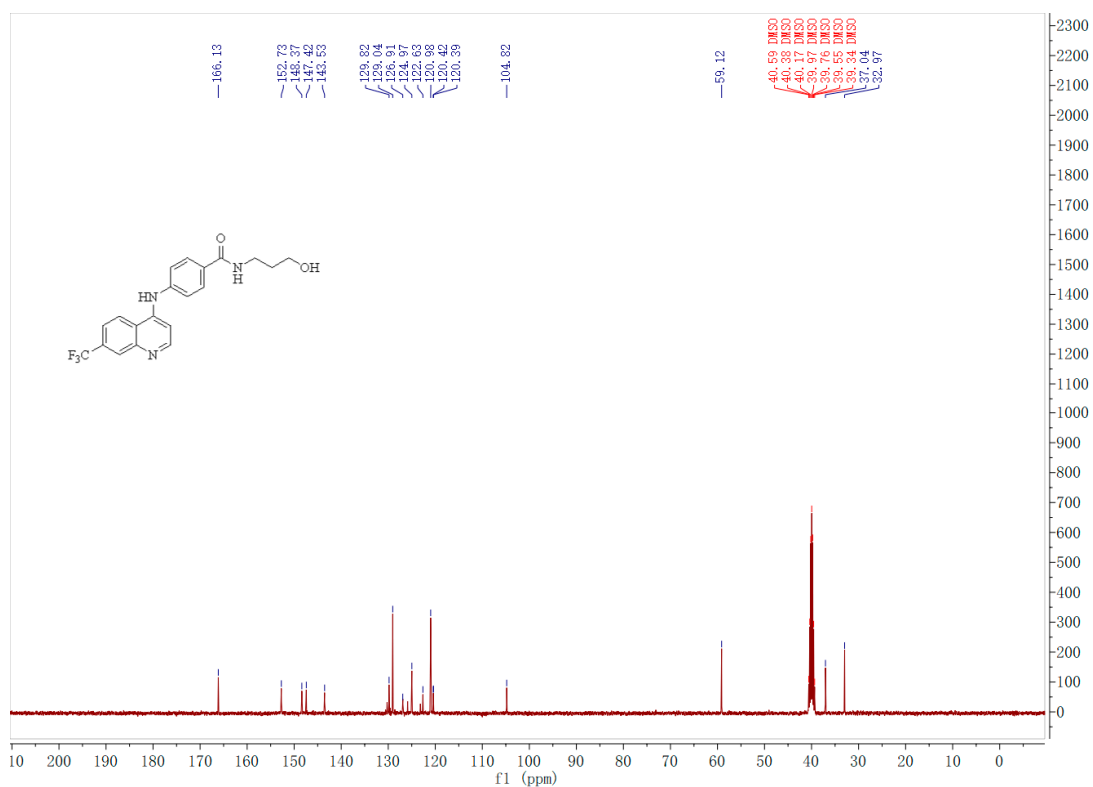Figure S49.  $^{13}\text{C}$  NMR spectra of the target compound G05.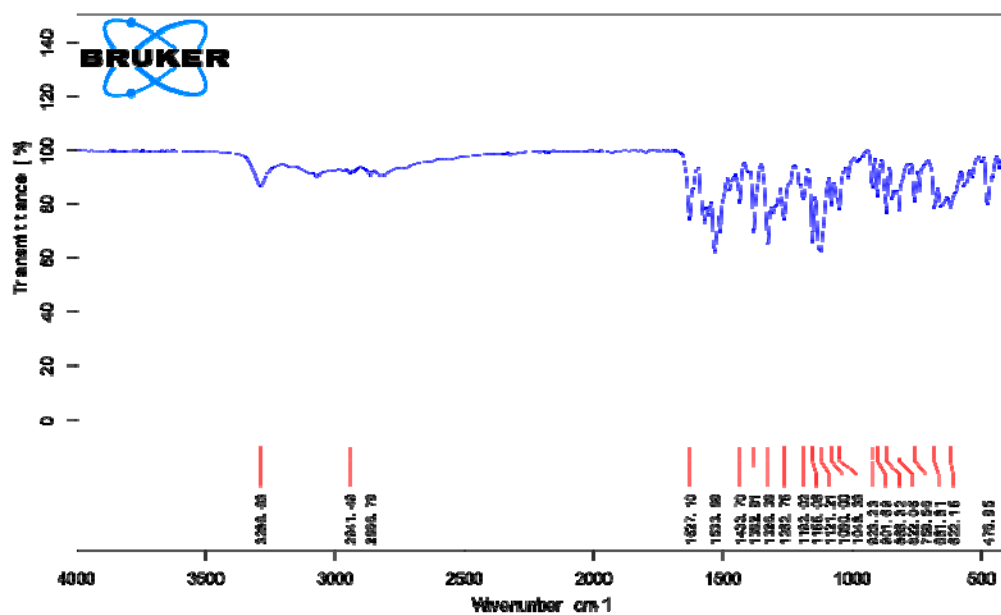

Figure S50. IR spectra of the target compound G05.

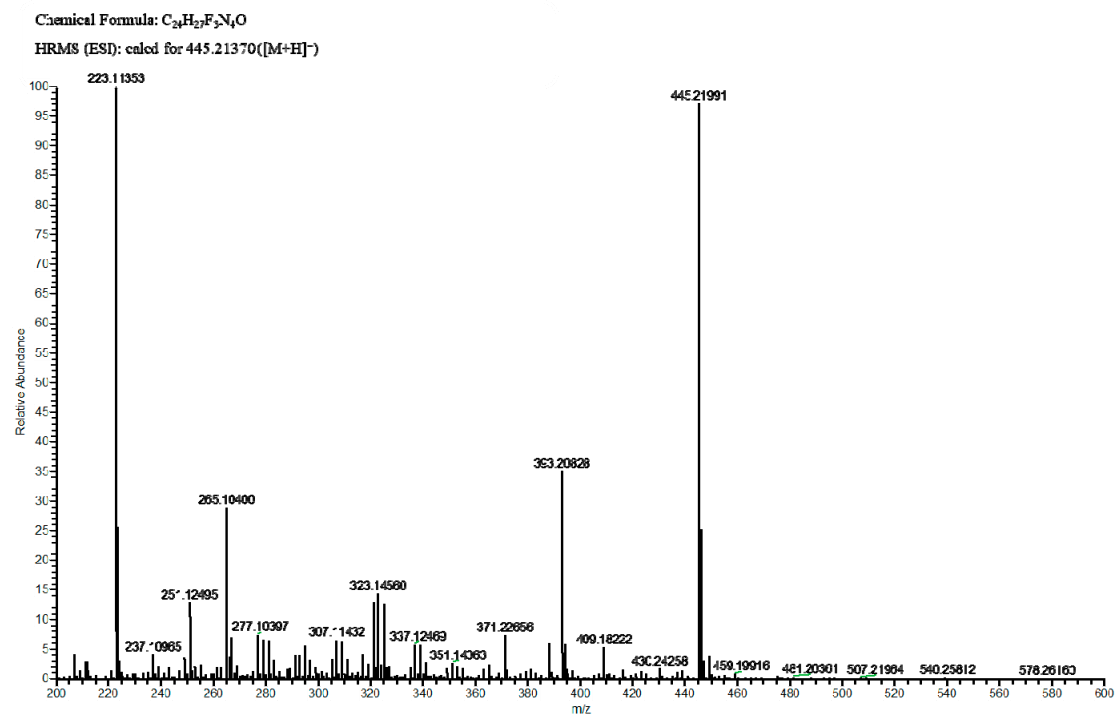

Figure S51. HRMS (ESI) of the target compound G06.

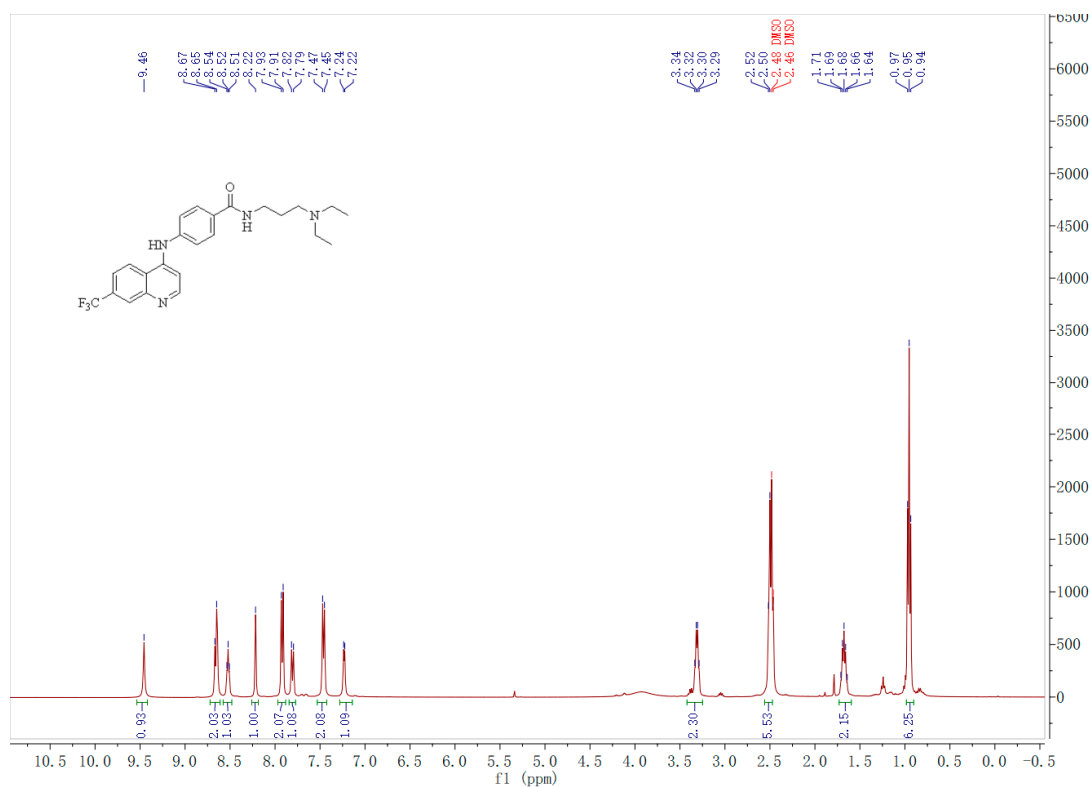Figure S52. <sup>1</sup>H NMR spectra of the target compound G06.

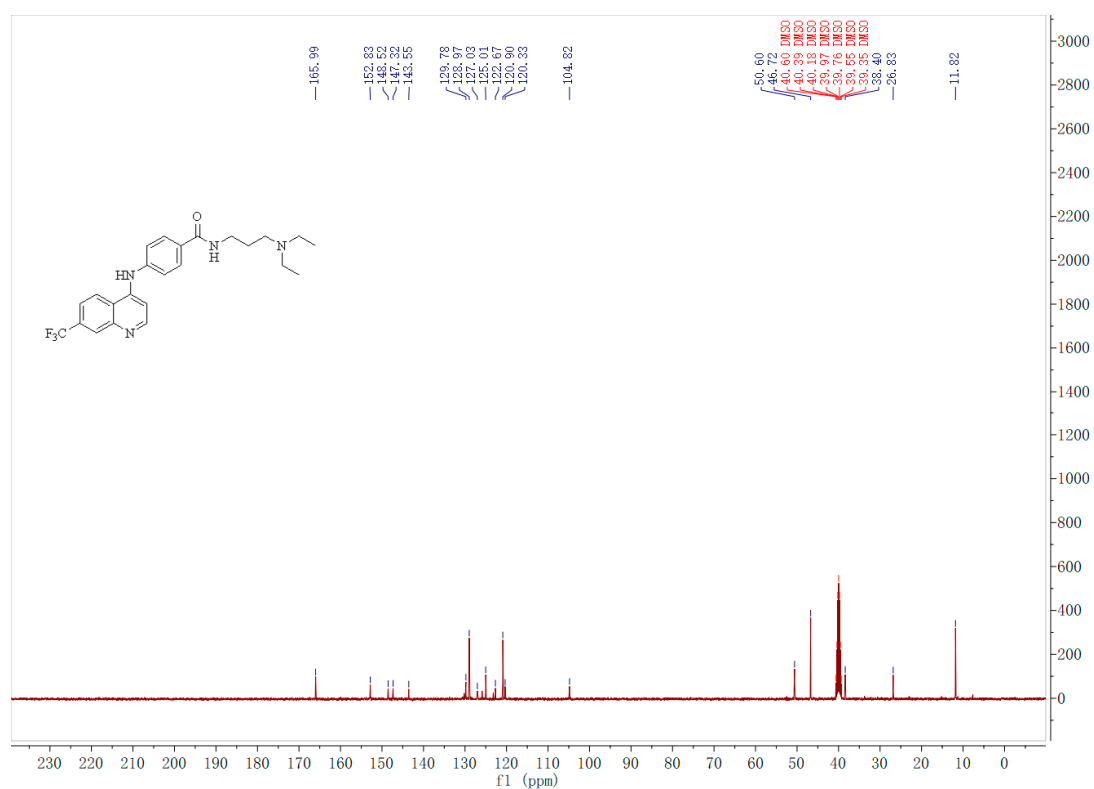Figure S53.  $^{13}\text{C}$  NMR spectra of the target compound G06.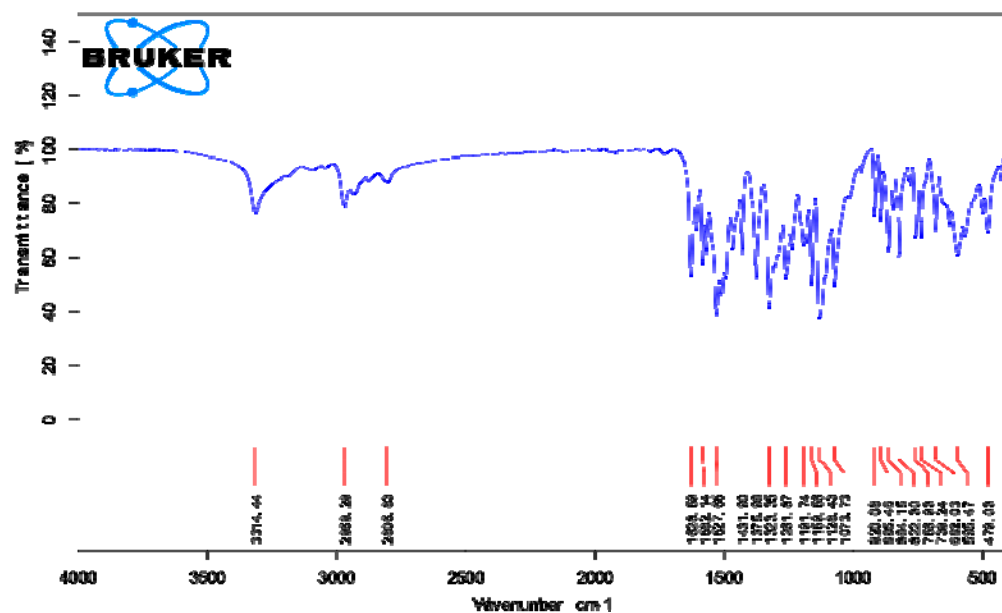

Figure S54. IR spectra of the target compound G06.

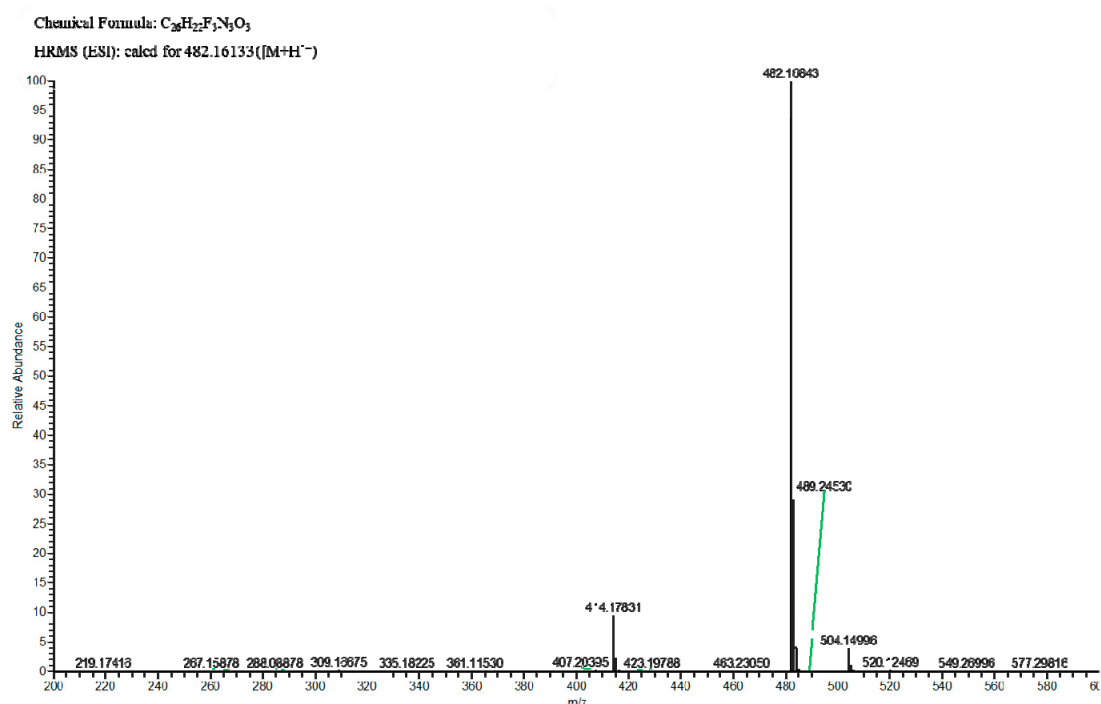

Figure S55. HRMS (ESI) of the target compound G07.

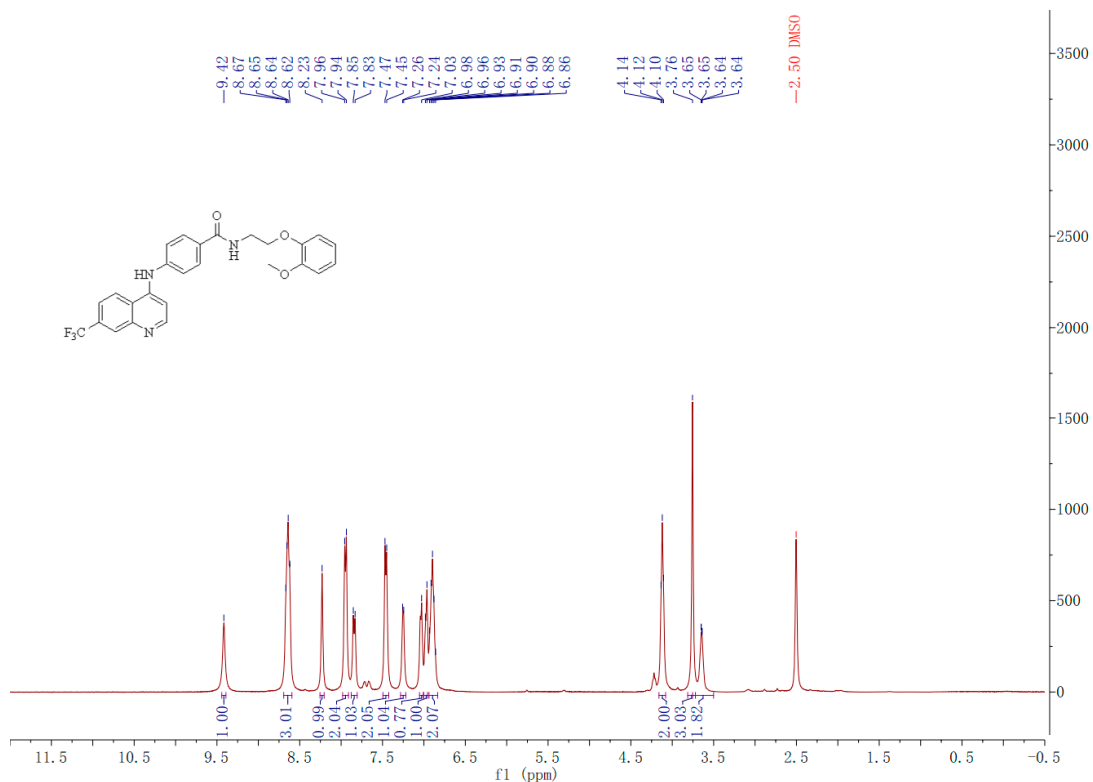Figure S56.  $^1H$  NMR spectra of the target compound G07.

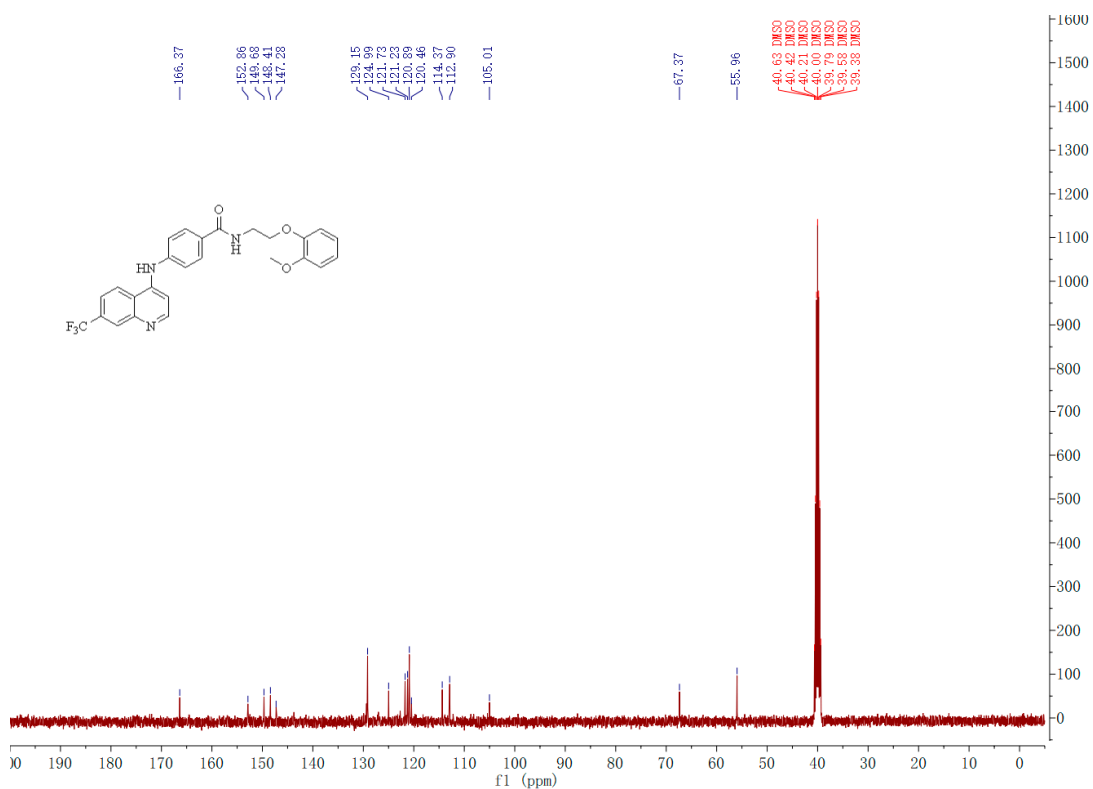Figure S57. <sup>13</sup>C NMR spectra of the target compound G07.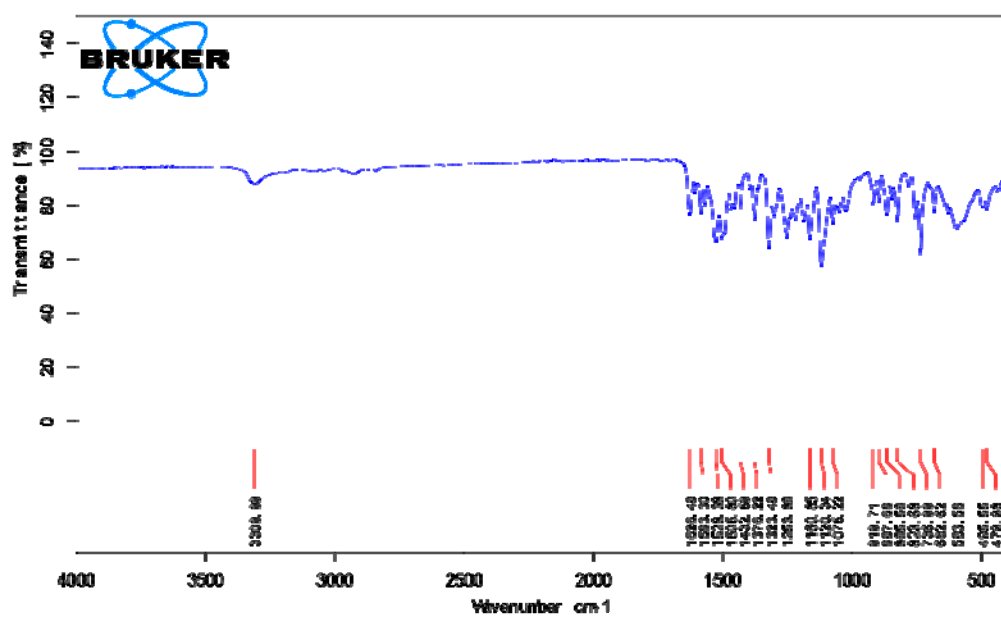

Figure S58. IR spectra of the target compound G07.

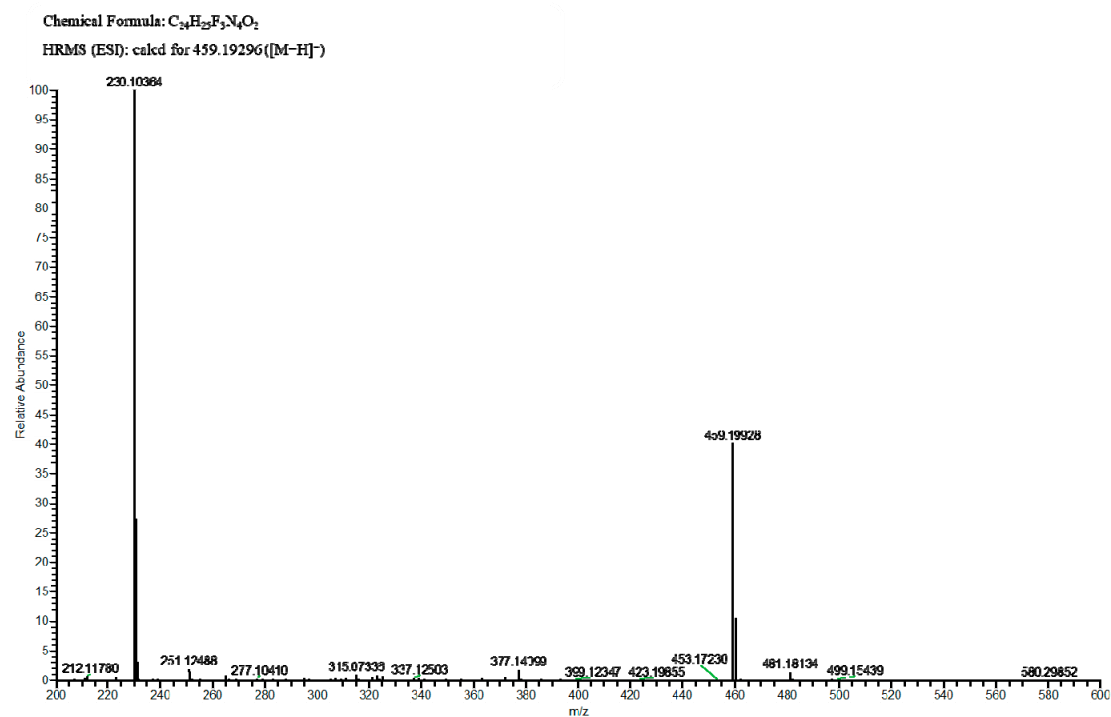

Figure S59. HRMS (ESI) of the target compound G08.

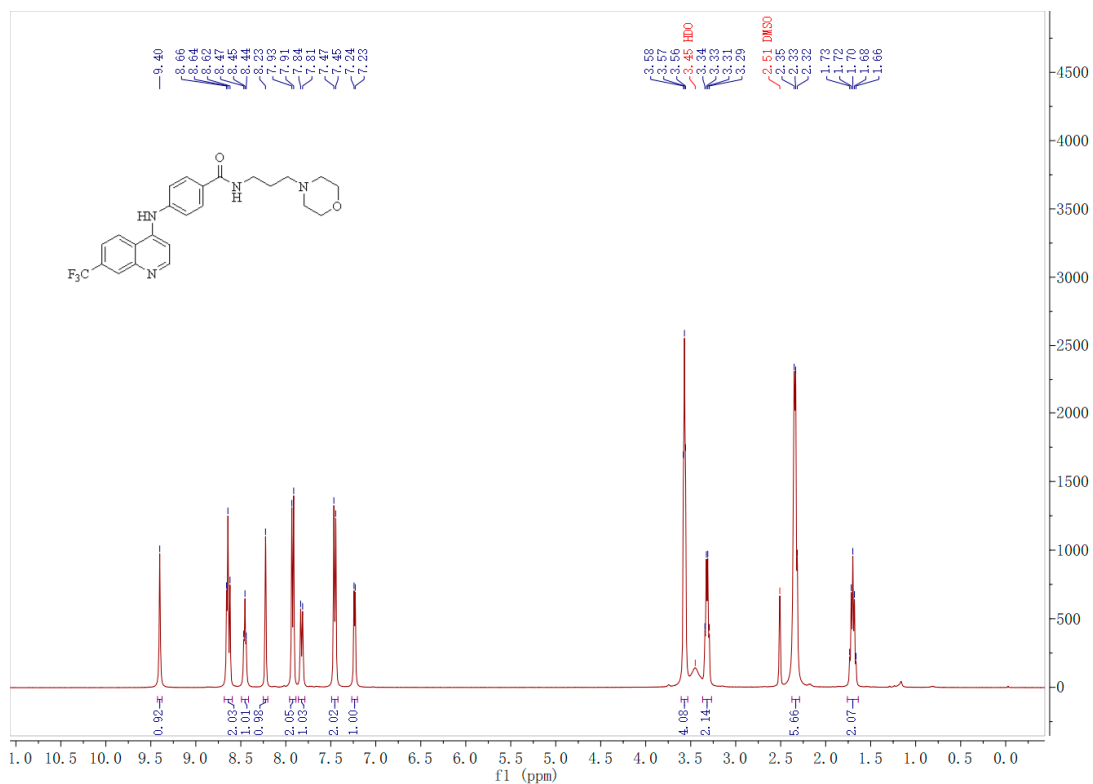Figure S60. <sup>1</sup>H NMR spectra of the target compound G08.



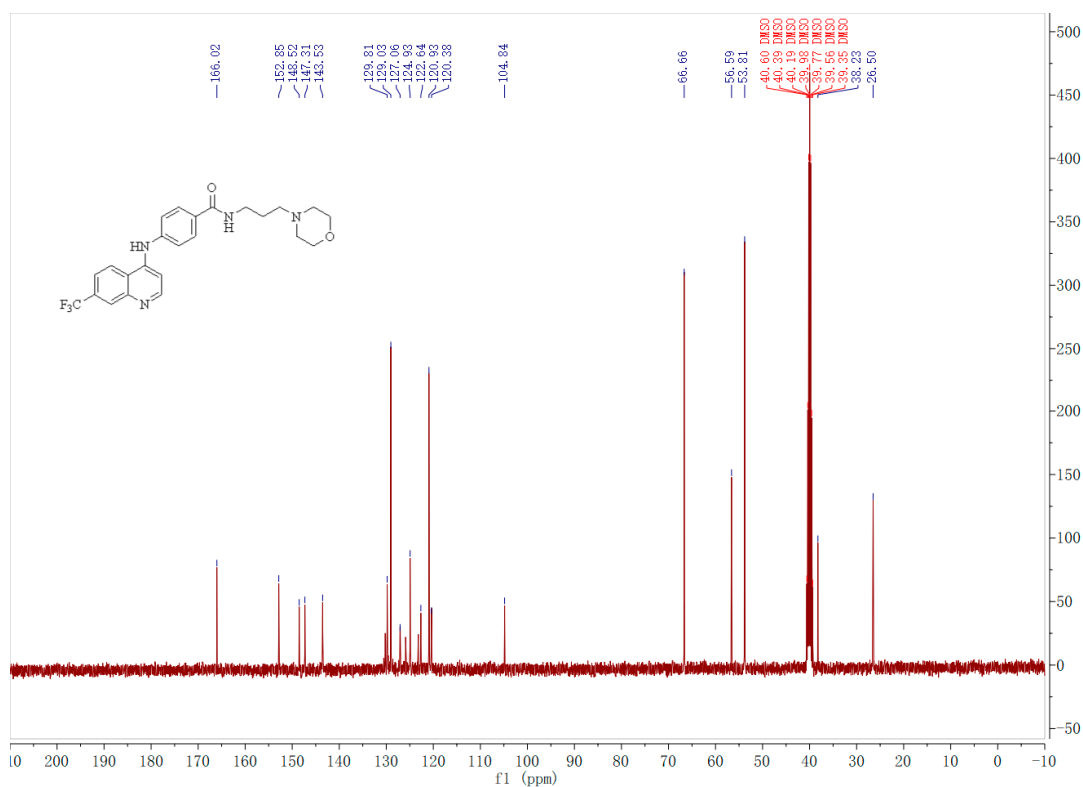Figure S61. <sup>13</sup>C NMR spectra of the target compound G08.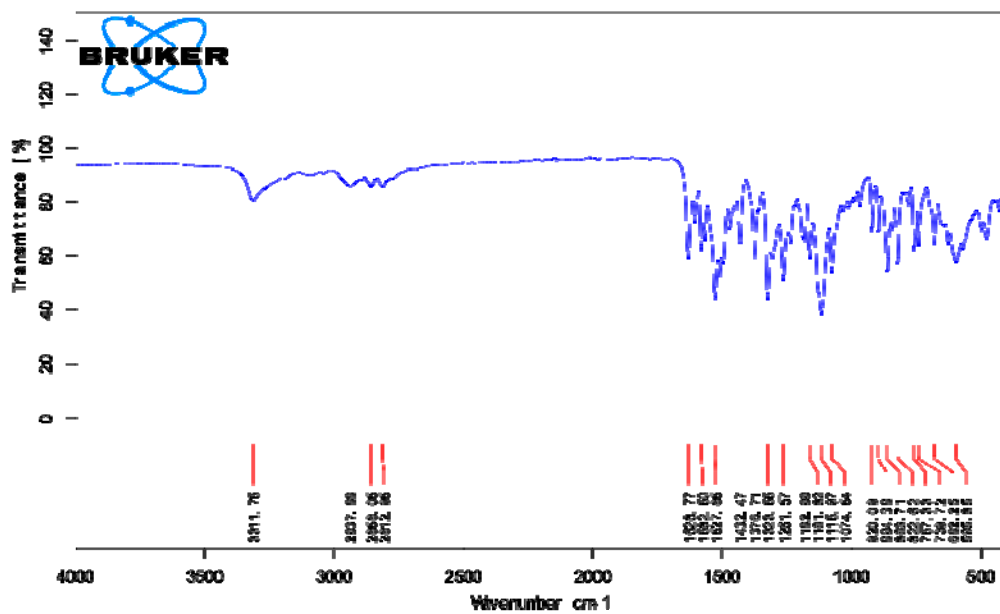

Figure S62. IR spectra of the target compound G08.

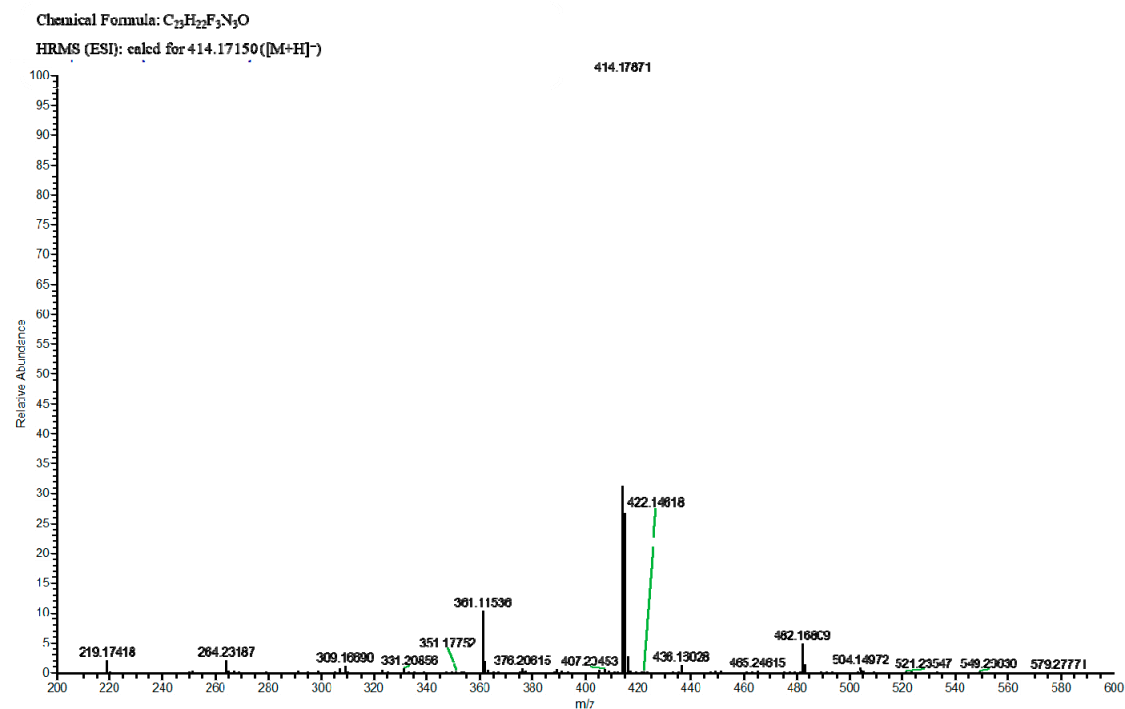

Figure S63. HRMS (ESI) of the target compound G09.

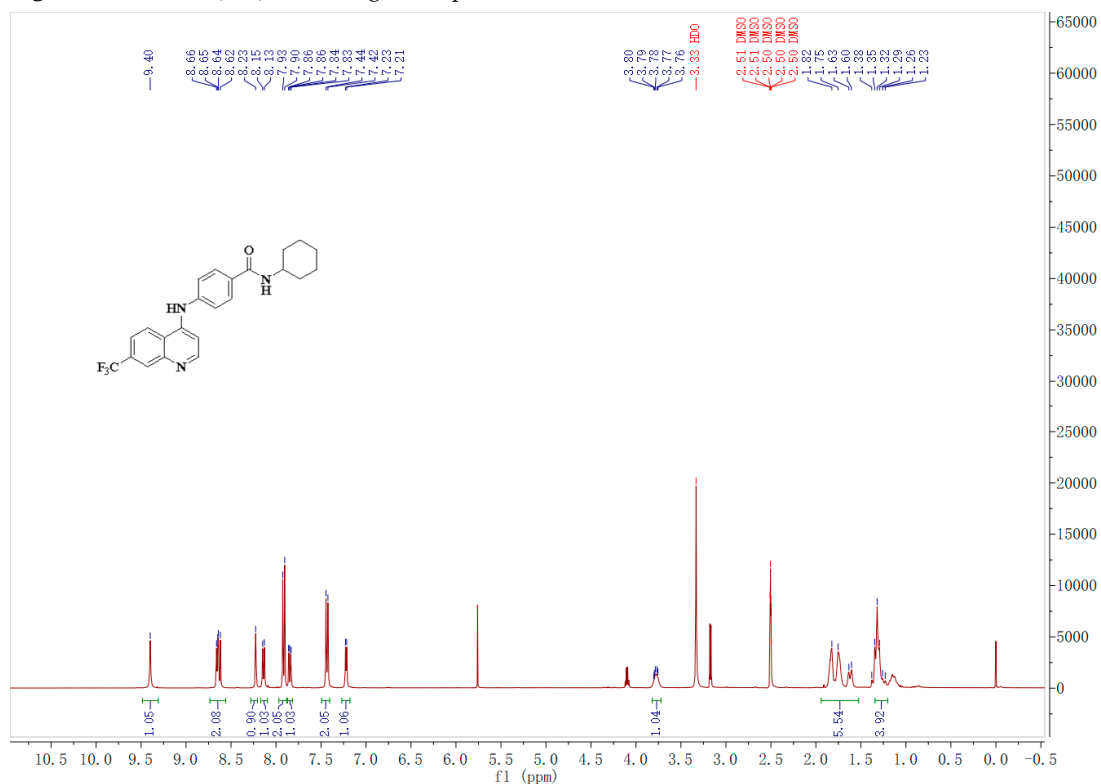Figure S64.  $^1\text{H}$  NMR spectra of the target compound G09.

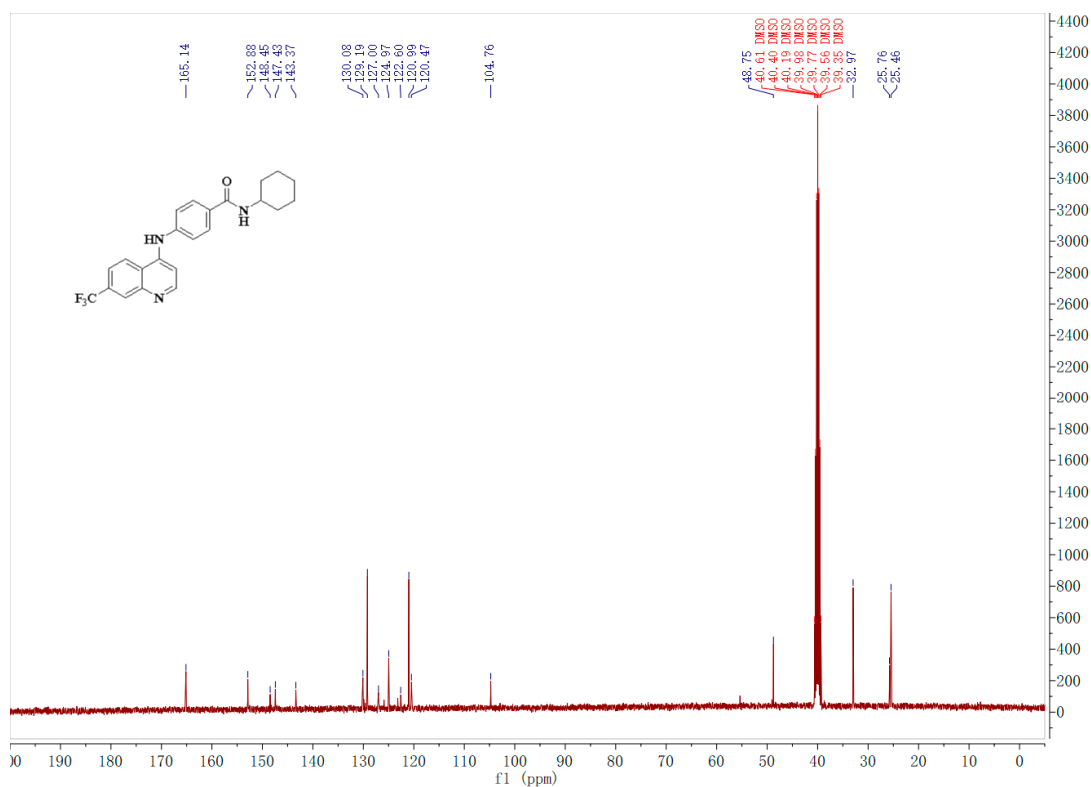Figure S65. <sup>13</sup>C NMR spectra of the target compound G09.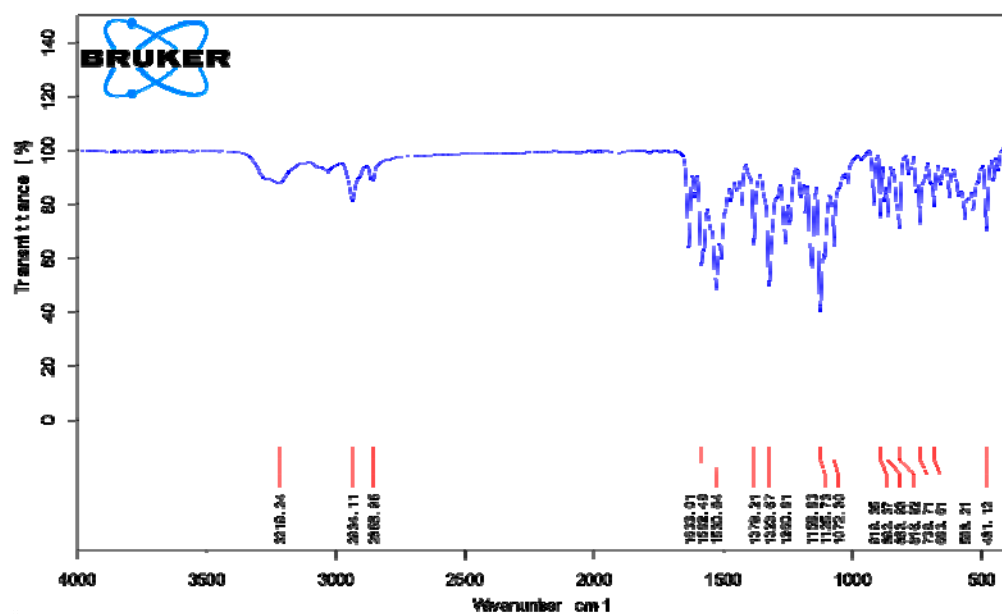

Figure S66. IR spectra of the target compound G09.

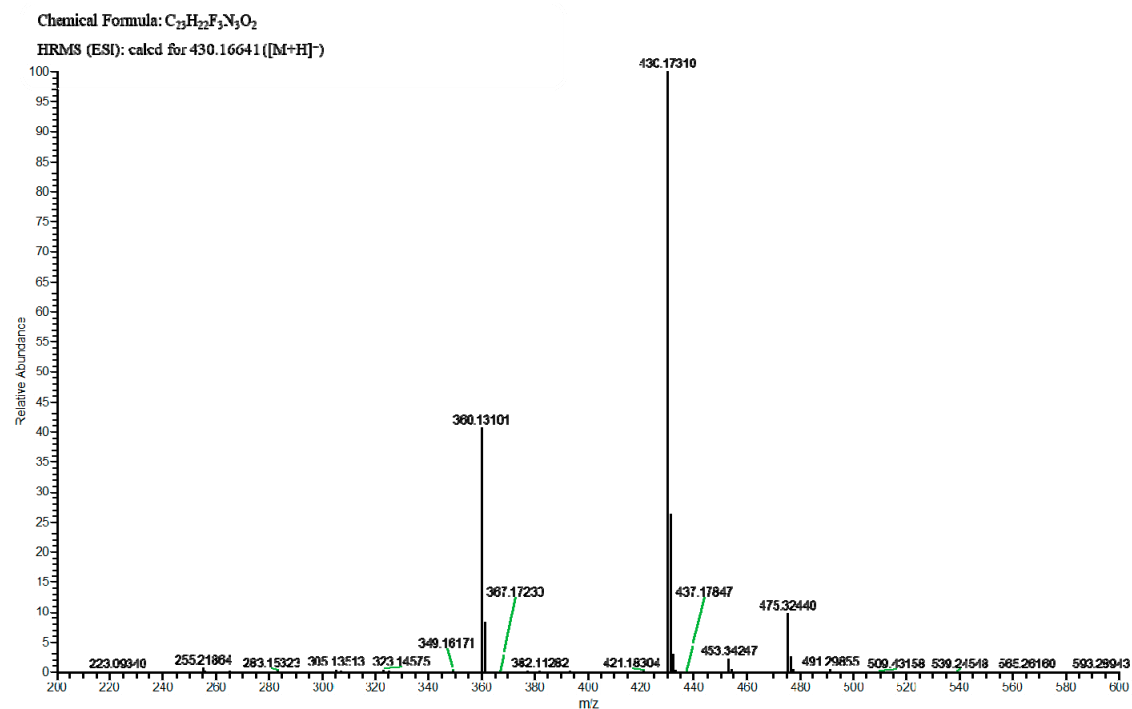

Figure S67. HRMS (ESI) of the target compound G10.

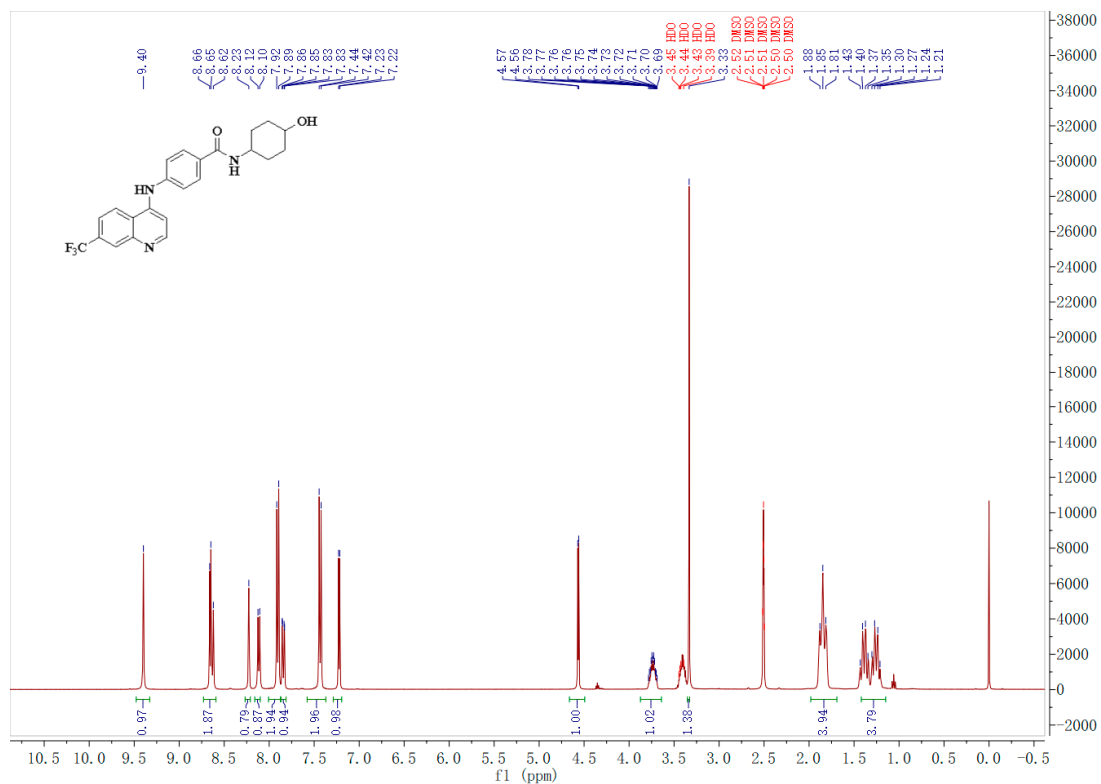Figure S68. <sup>1</sup>H NMR spectra of the target compound G10.

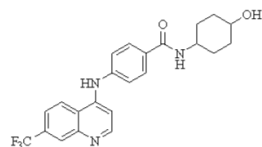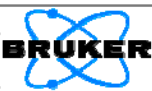

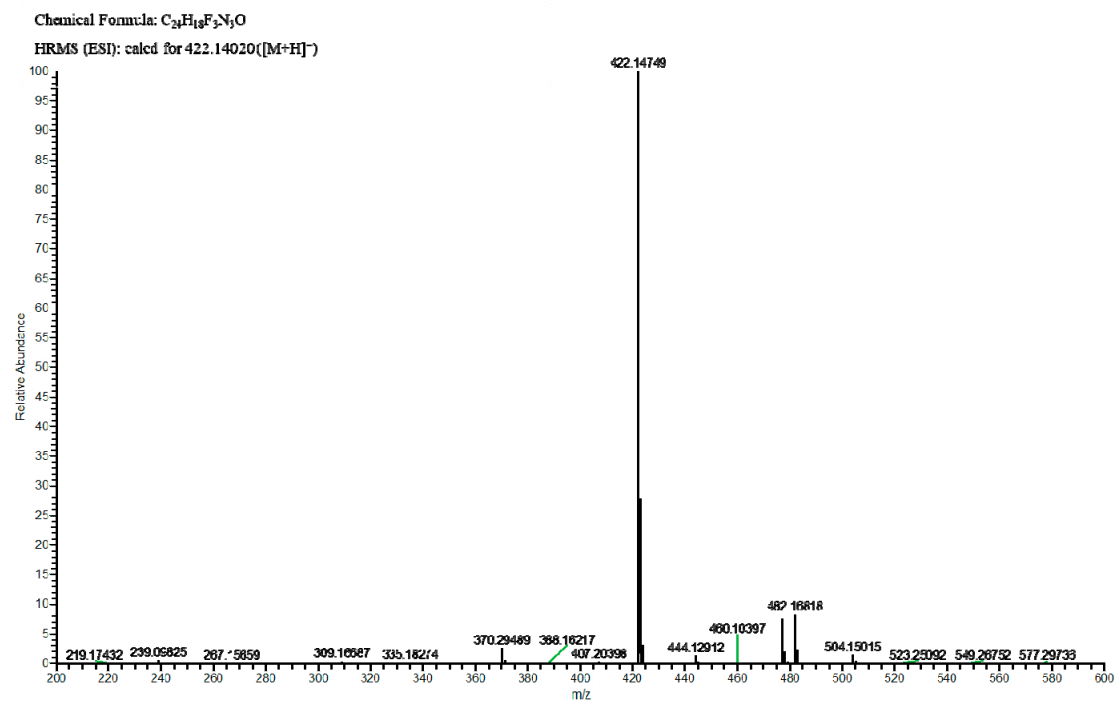

Figure S71. HRMS (ESI) of the target compound G11.

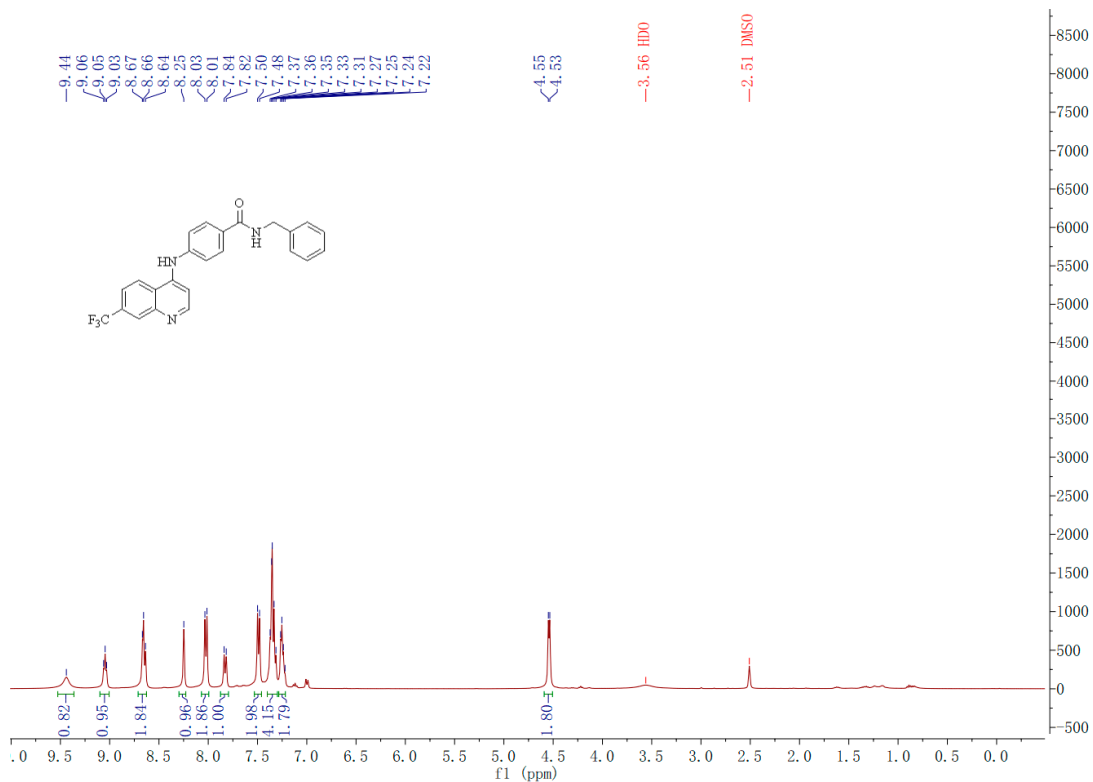Figure S72.  $^1H$  NMR spectra of the target compound G11.

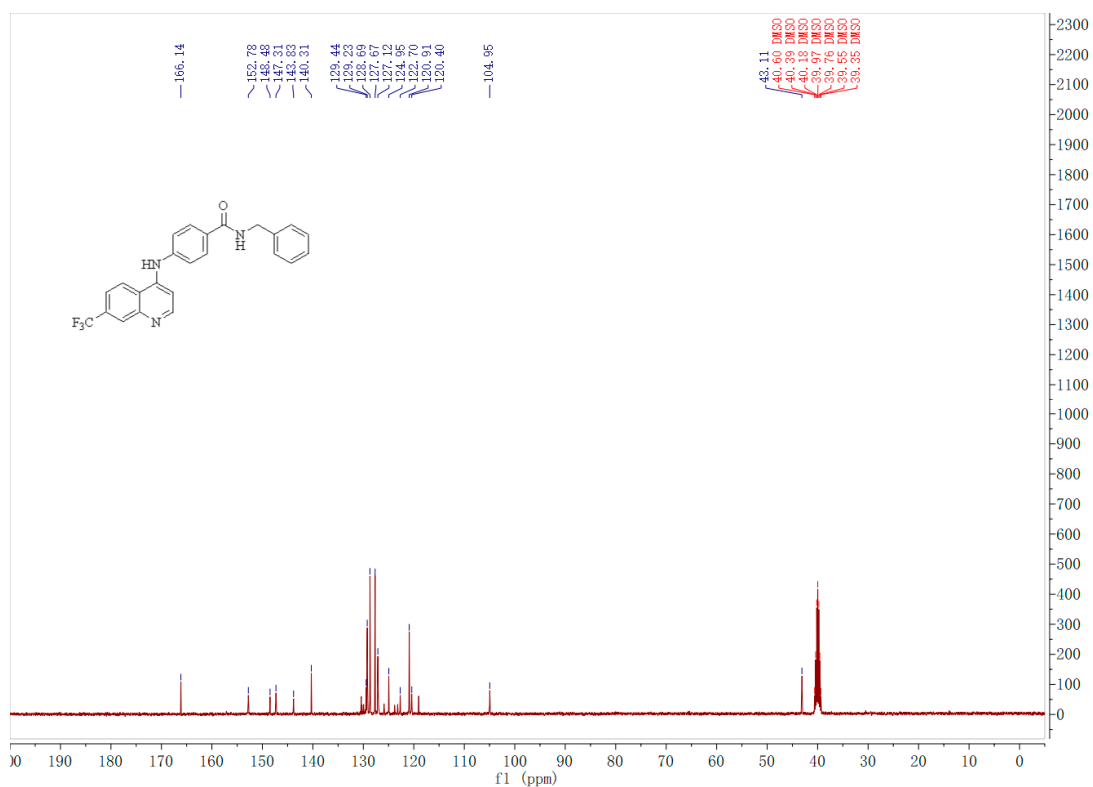Figure S73. <sup>13</sup>C NMR spectra of the target compound G11.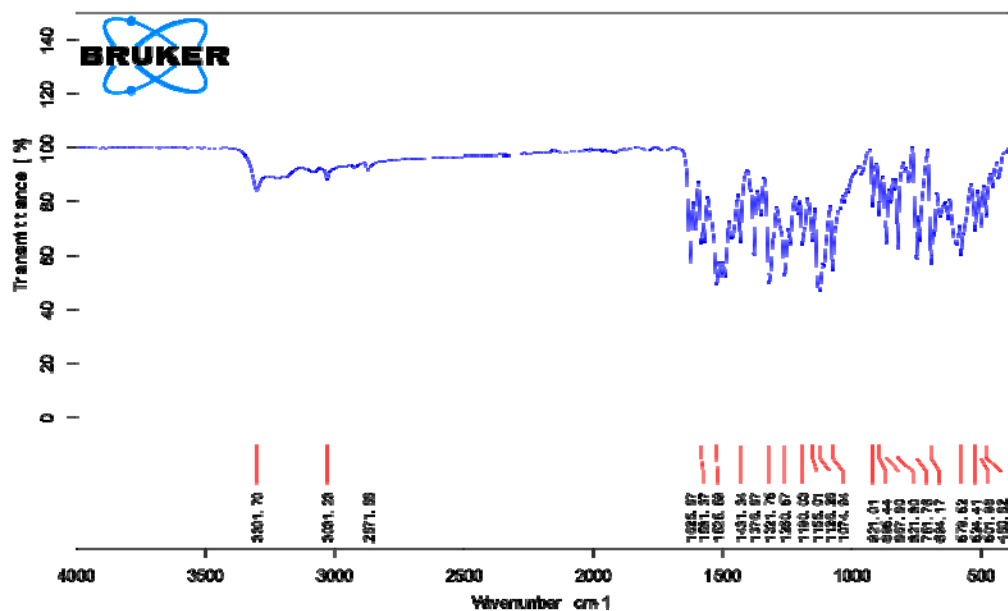

Figure S74. IR spectra of the target compound G11.

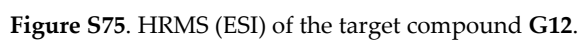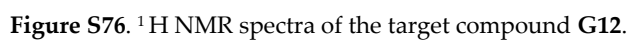



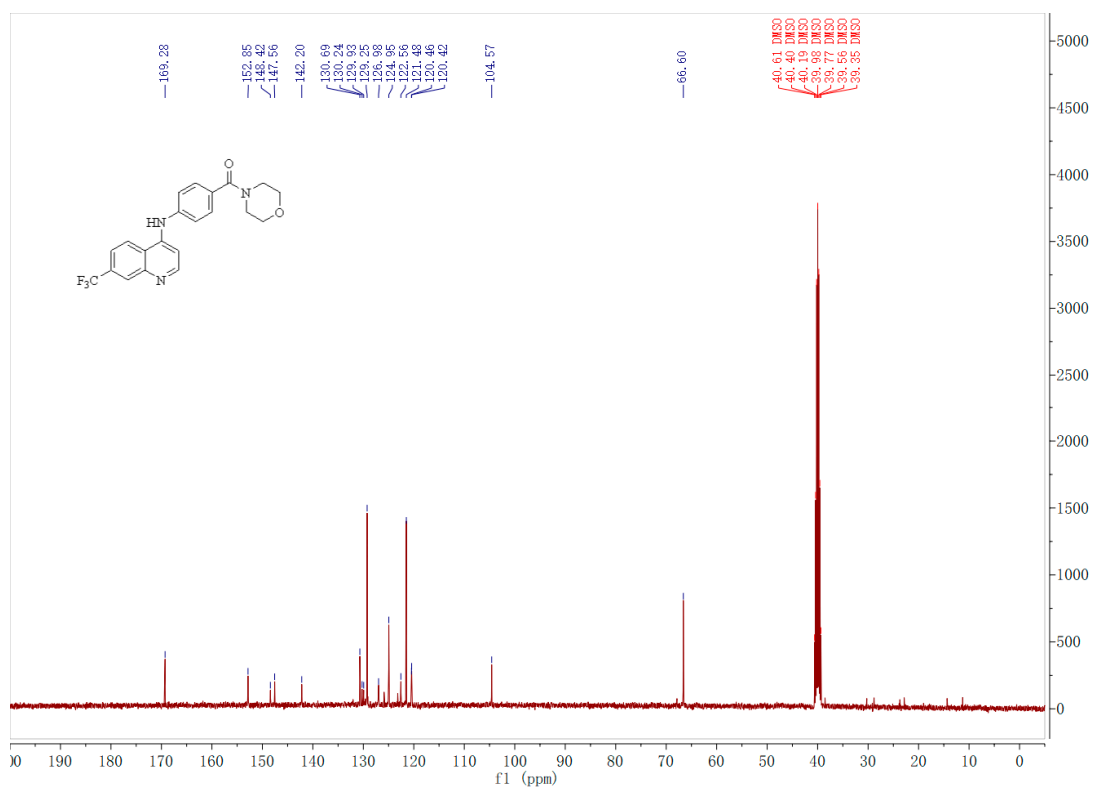Figure S77. <sup>13</sup>C NMR spectra of the target compound G12.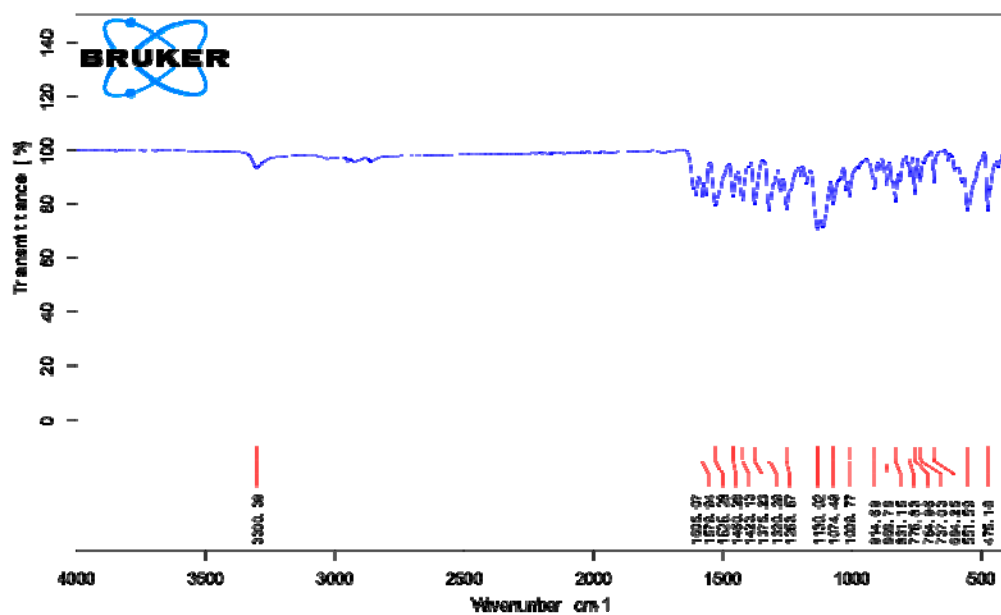

Figure S78. IR spectra of the target compound G12.

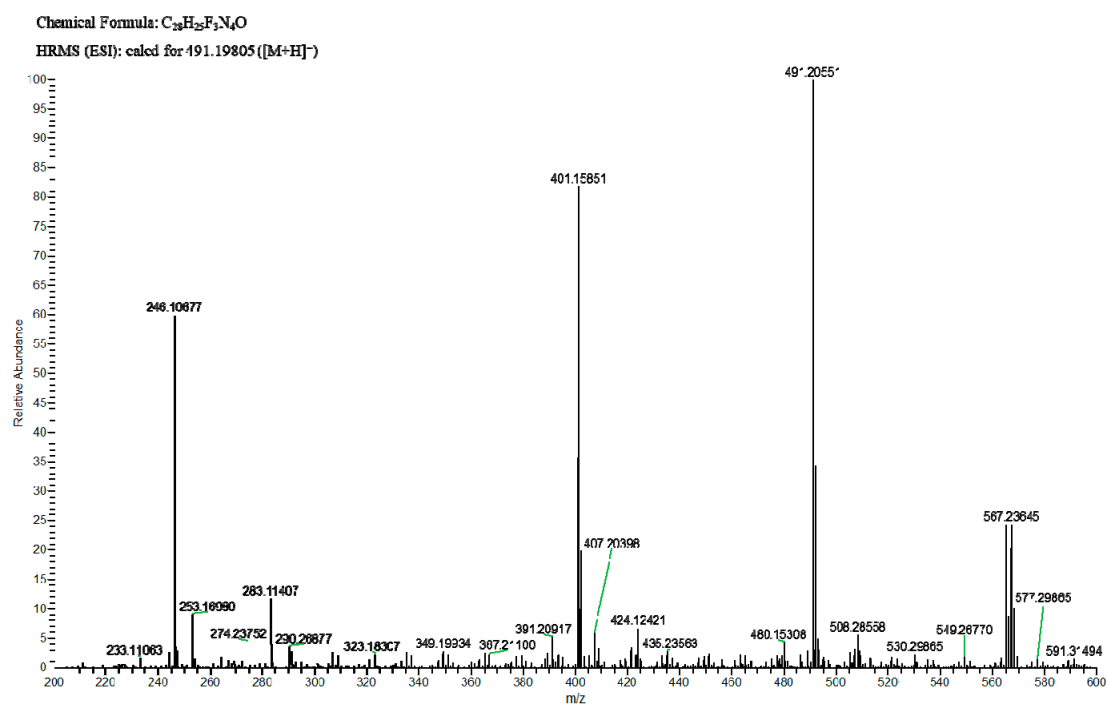

Figure S79. HRMS (ESI) of the target compound G13.

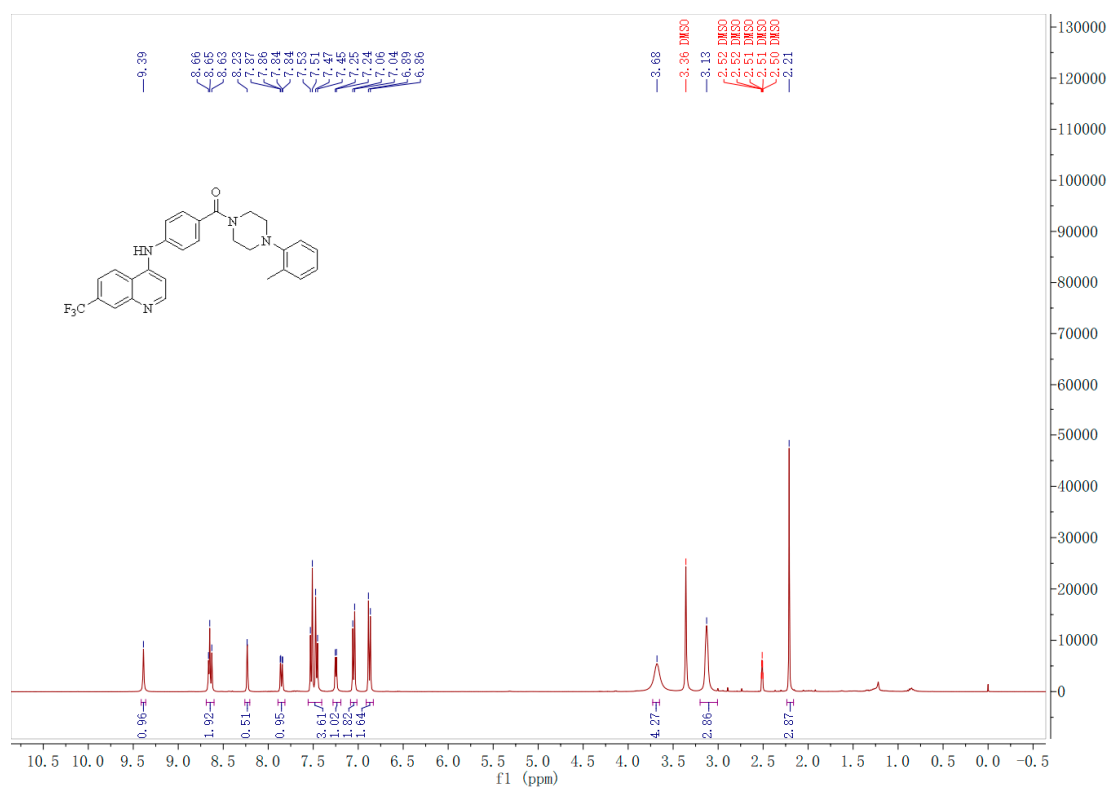Figure S80.  $^1H$  NMR spectra of the target compound G13.

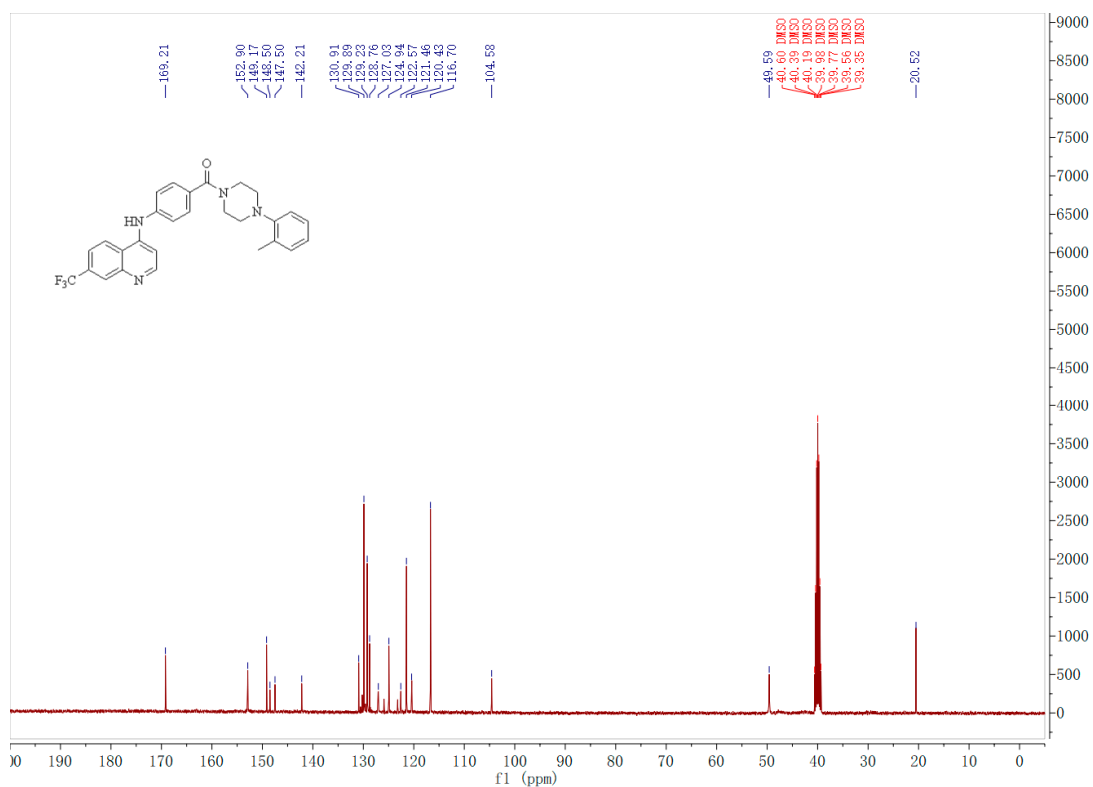Figure S81. <sup>13</sup>C NMR spectra of the target compound G13.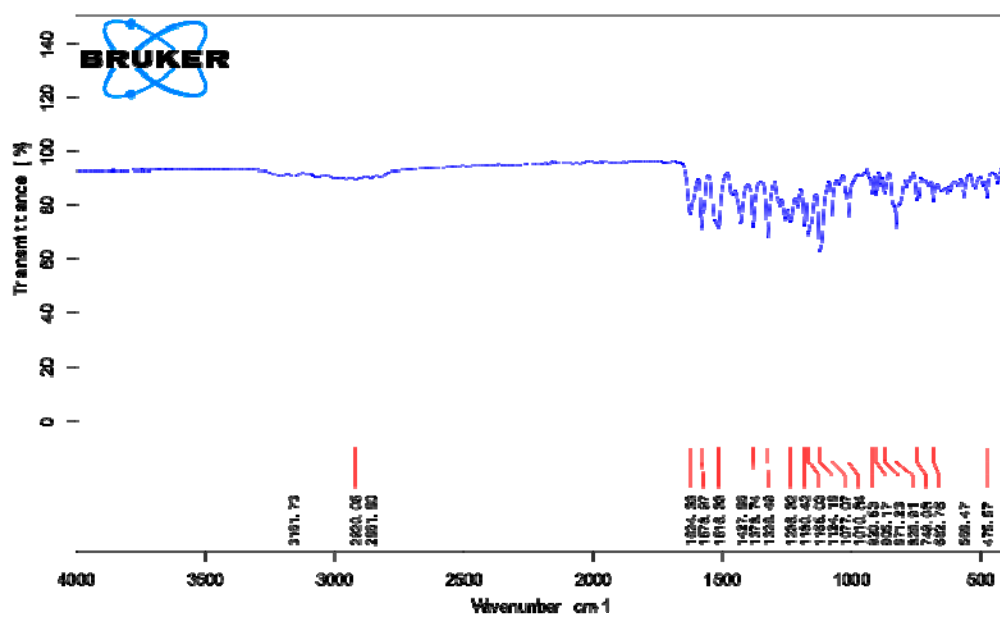

Figure S82. IR spectra of the target compound G13.

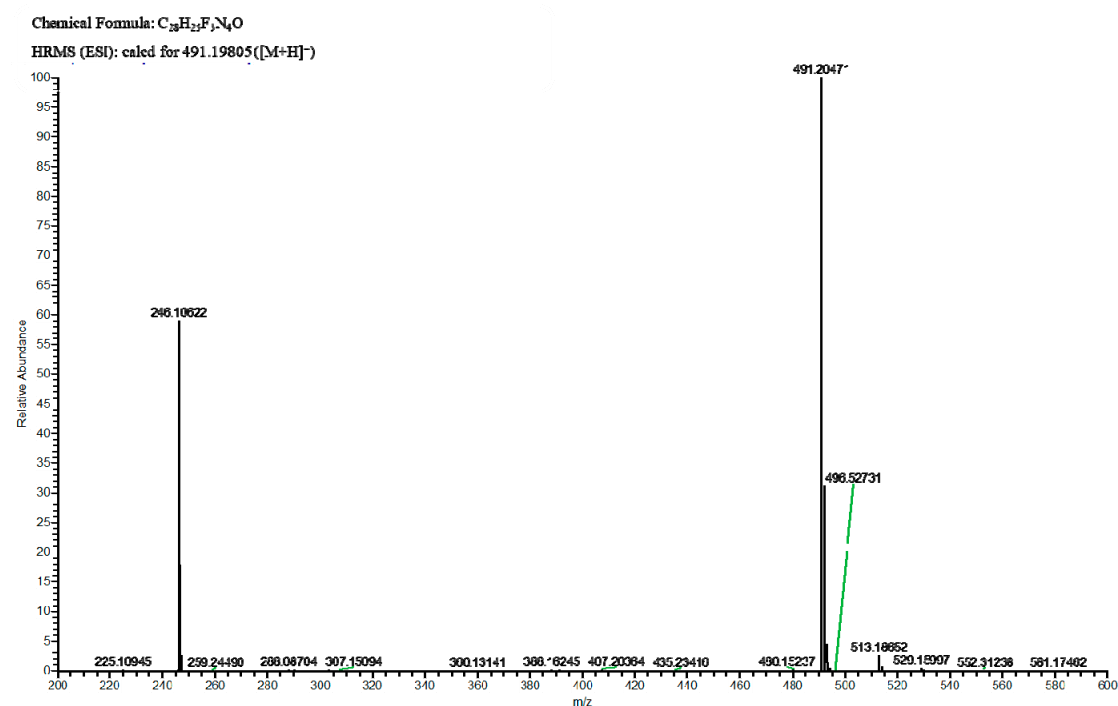

Figure S83. HRMS (ESI) of the target compound G14.

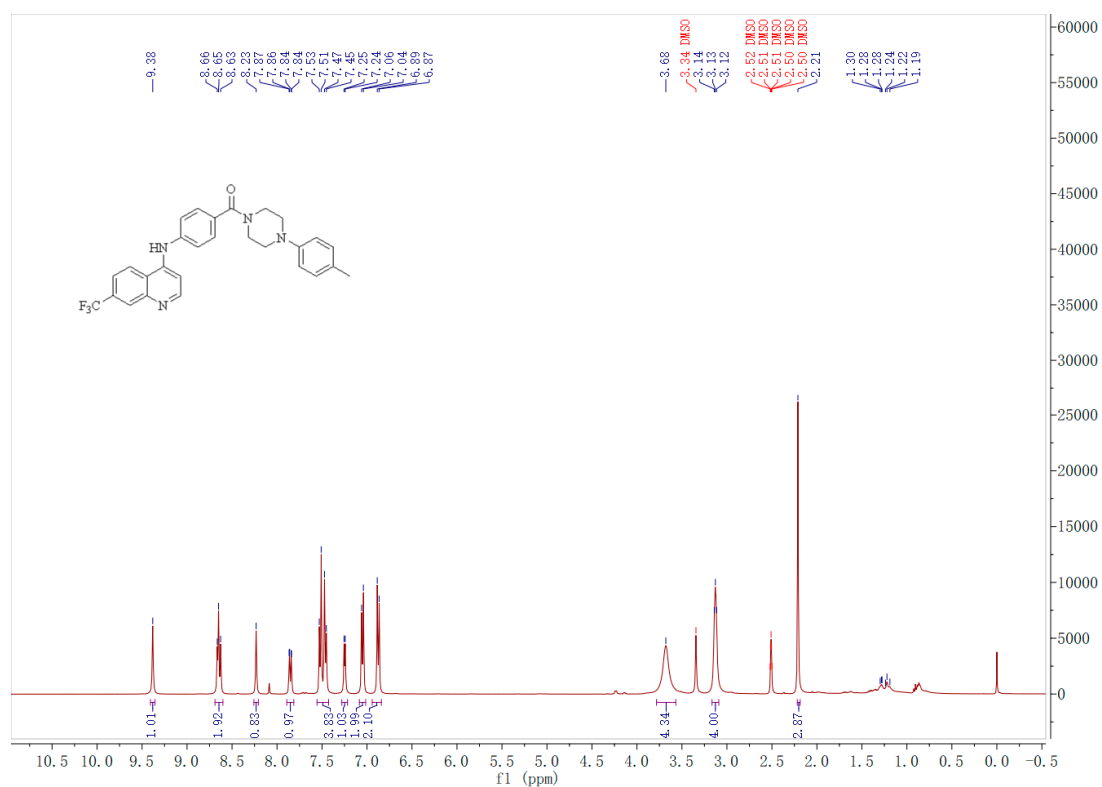Figure S84.  $^1H$  NMR spectra of the target compound G14.

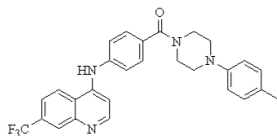

IR Spectrum (Wavenumber  $\text{cm}^{-1}$  vs. Transmittance %):

| Wavenumber ( $\text{cm}^{-1}$ ) | Transmittance (%) |
|---------------------------------|-------------------|
| 3481.66                         | ~100              |
| 2920.72                         | ~100              |
| 2858.20                         | ~100              |
| 1625.17                         | ~90               |
| 1572.00                         | ~90               |
| 1516.48                         | ~90               |
| 1437.04                         | ~90               |
| 1378.18                         | ~90               |
| 1327.20                         | ~90               |
| 1268.24                         | ~90               |
| 1184.66                         | ~90               |
| 1163.91                         | ~90               |
| 1123.93                         | ~90               |
| 1077.18                         | ~90               |
| 1036.00                         | ~90               |
| 925.34                          | ~90               |
| 871.15                          | ~90               |
| 827.18                          | ~90               |
| 749.70                          | ~90               |
| 682.66                          | ~90               |
| 599.45                          | ~90               |
| 479.00                          | ~90               |

**Figure S86.** IR spectra of the target compound **G14**.

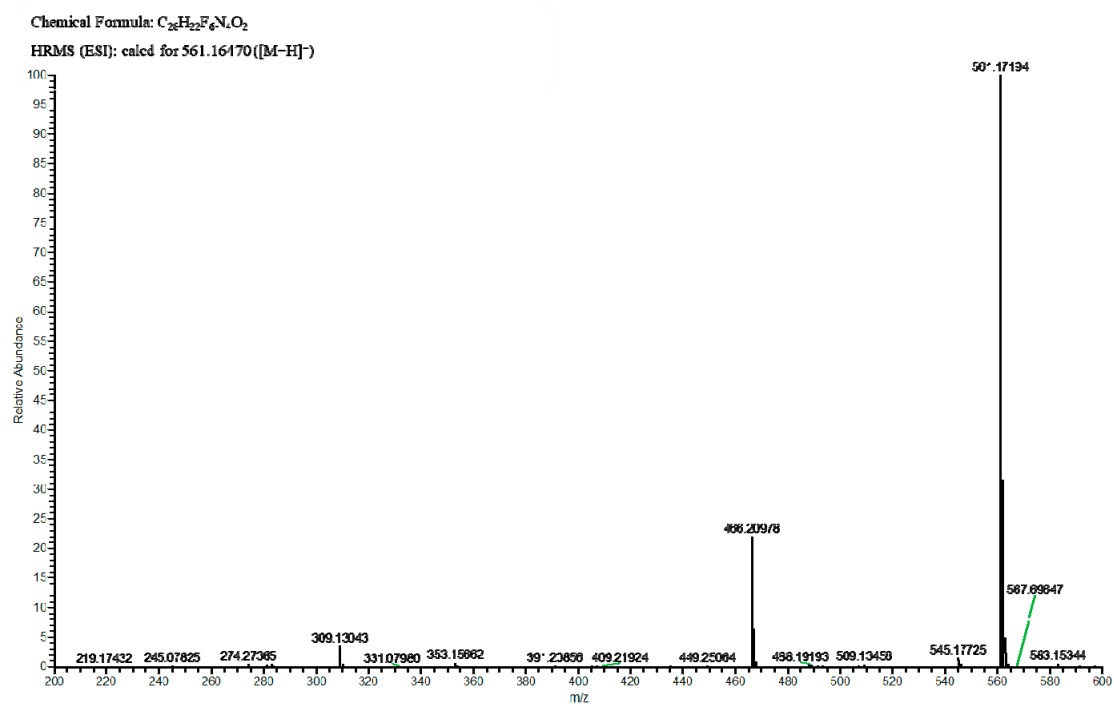

Figure S87. HRMS (ESI) of the target compound G15.

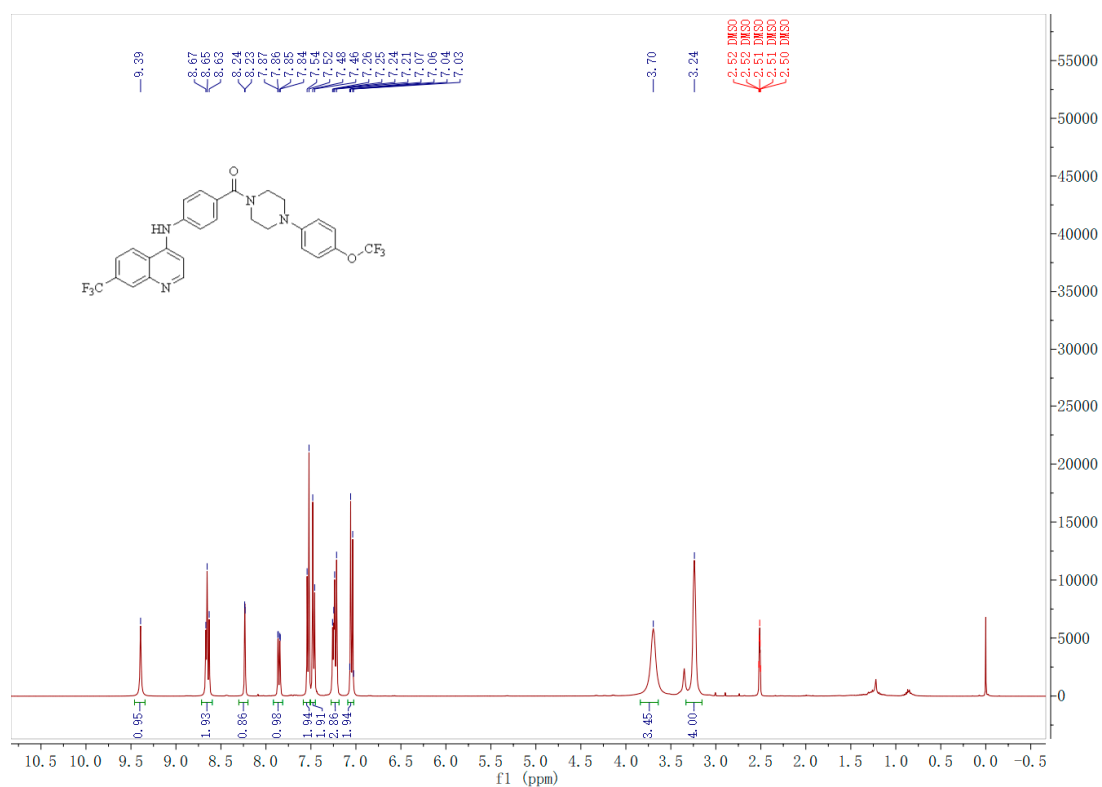Figure S88.  $^1H$  NMR spectra of the target compound G15.

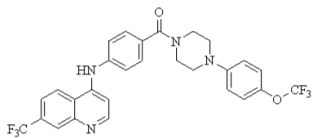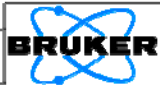

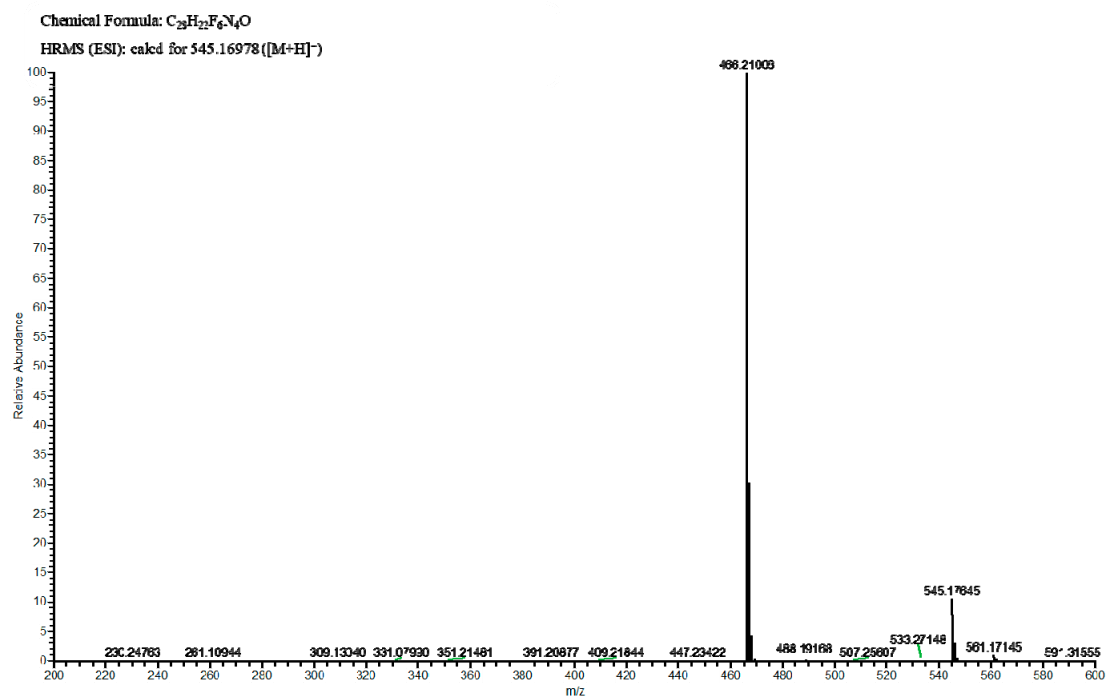

Figure S91. HRMS (ESI) of the target compound G16.

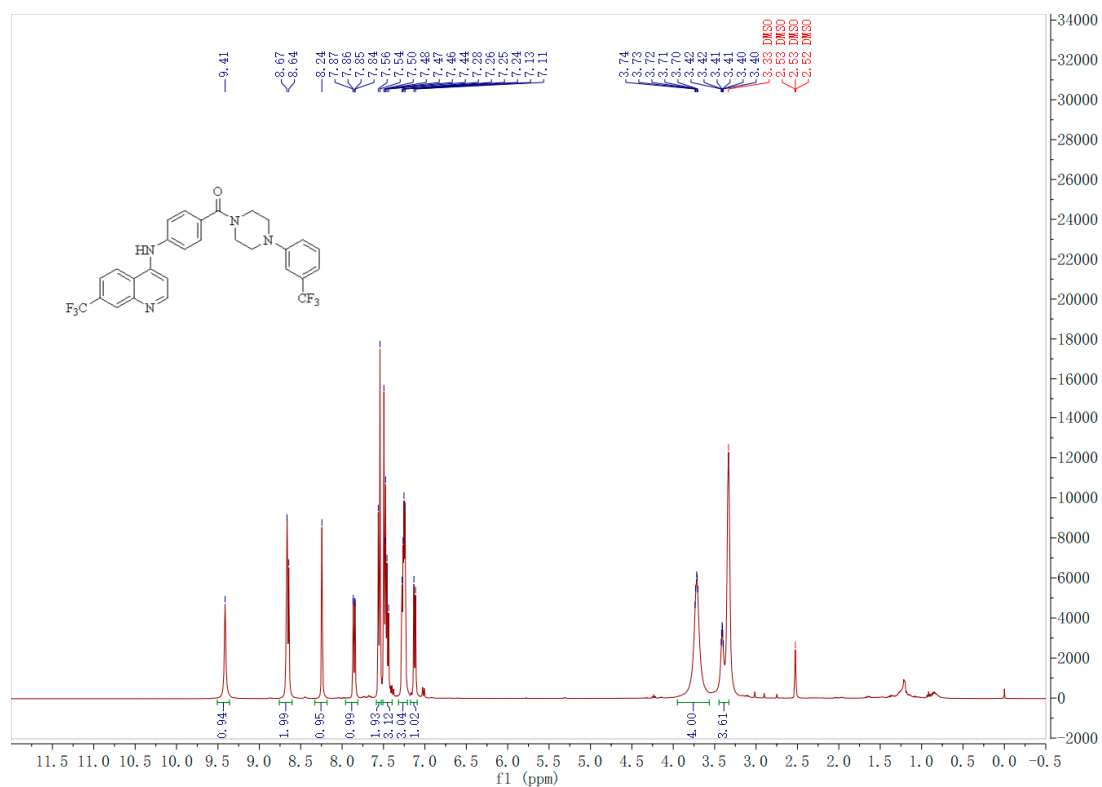Figure S92.  $^1H$  NMR spectra of the target compound G16.



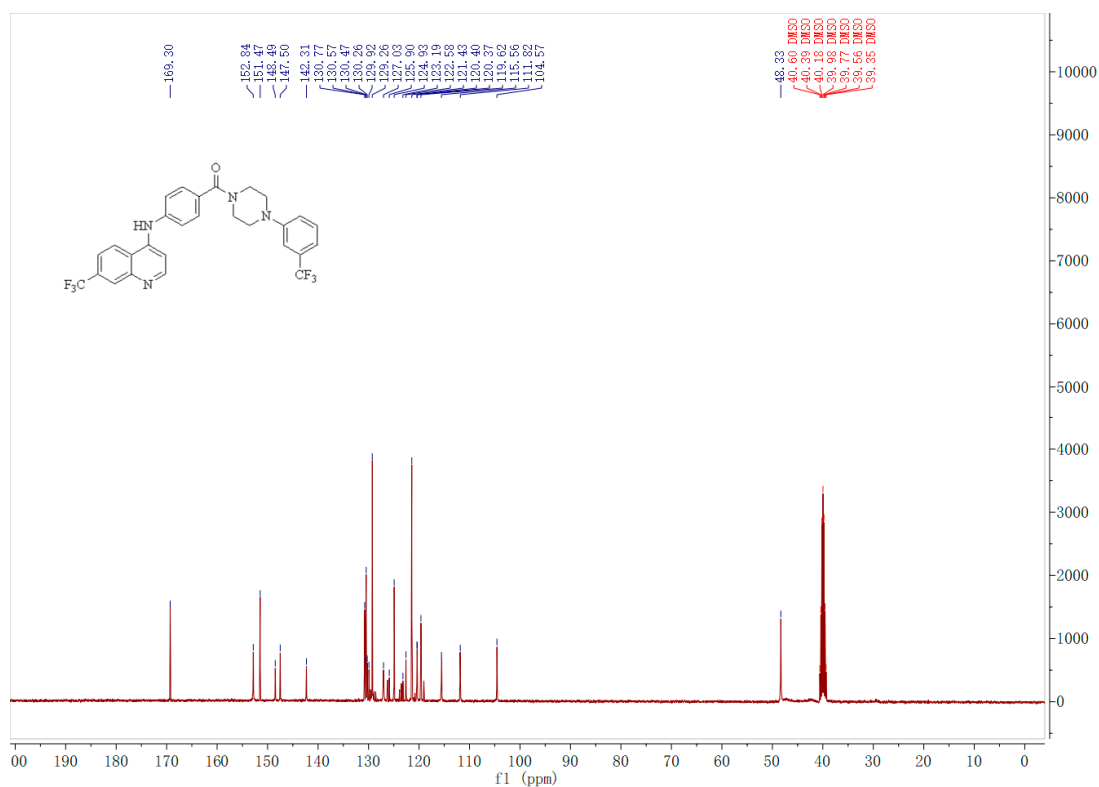Figure S93. <sup>13</sup>C NMR spectra of the target compound G16.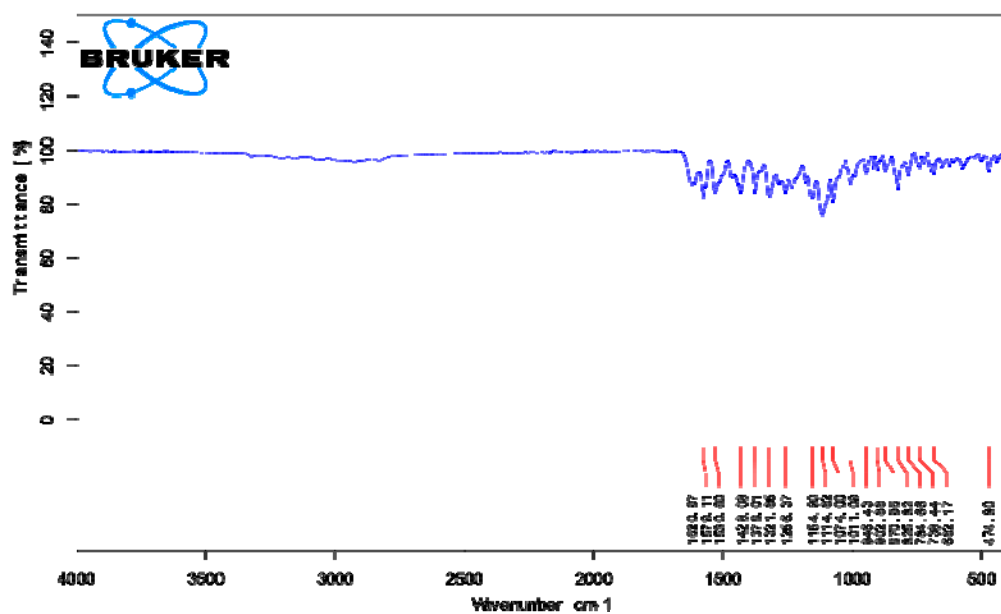

Figure S94. IR spectra of the target compound G16.

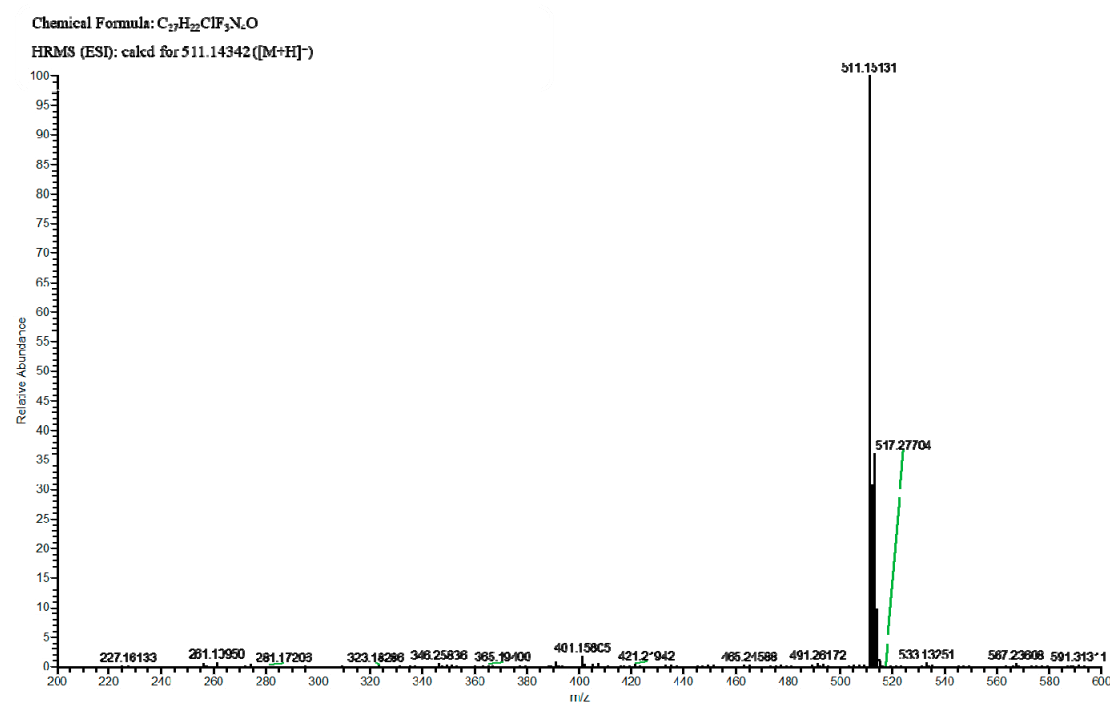

Figure S95. HRMS (ESI) of the target compound G17.

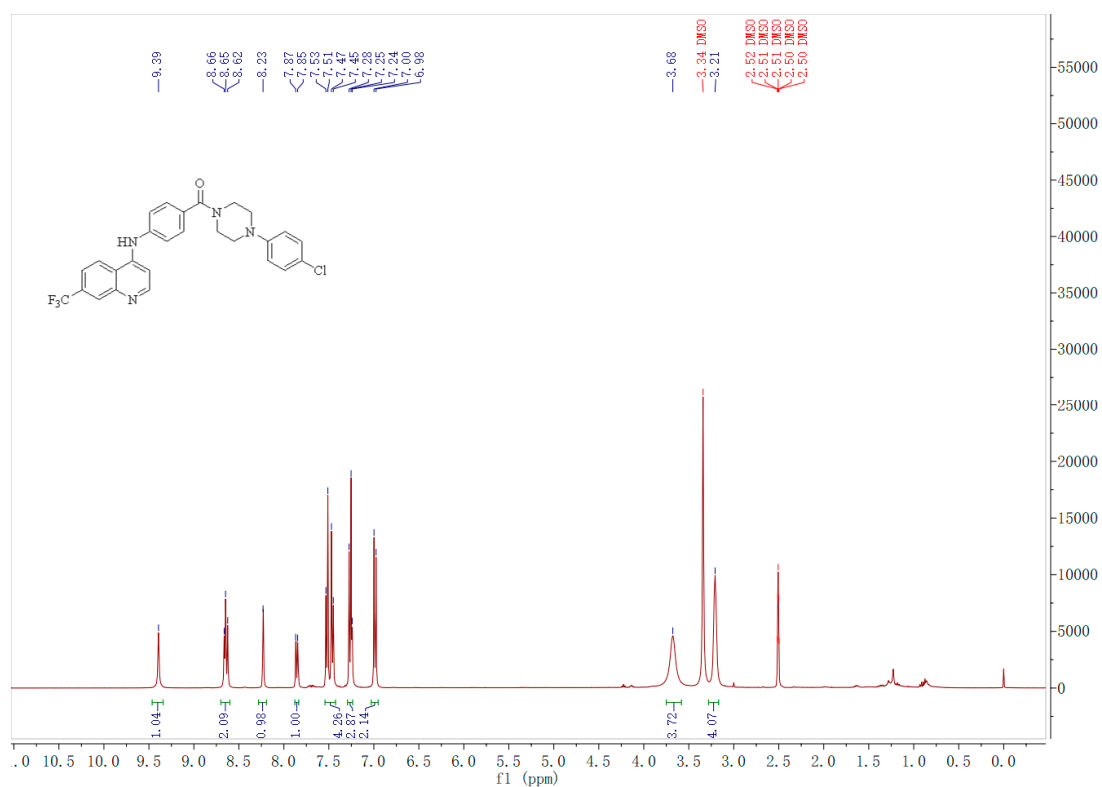Figure S96.  $^1H$  NMR spectra of the target compound G17.

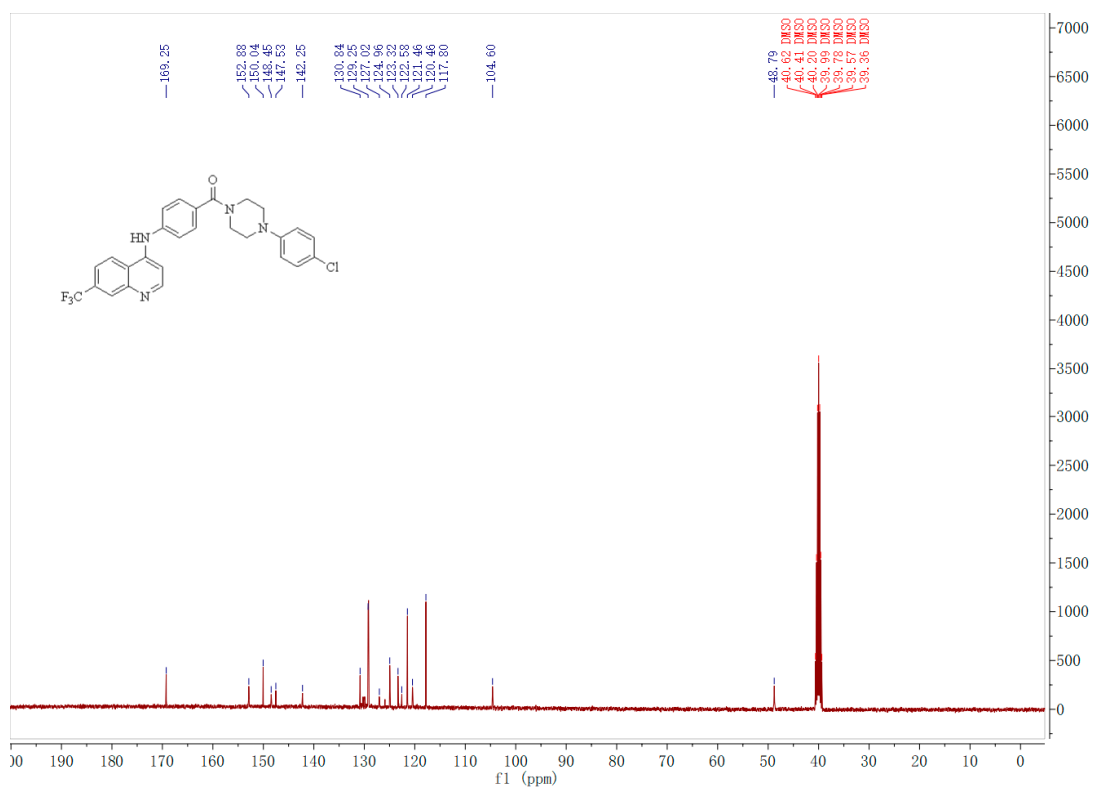Figure S97. <sup>13</sup>C NMR spectra of the target compound G17.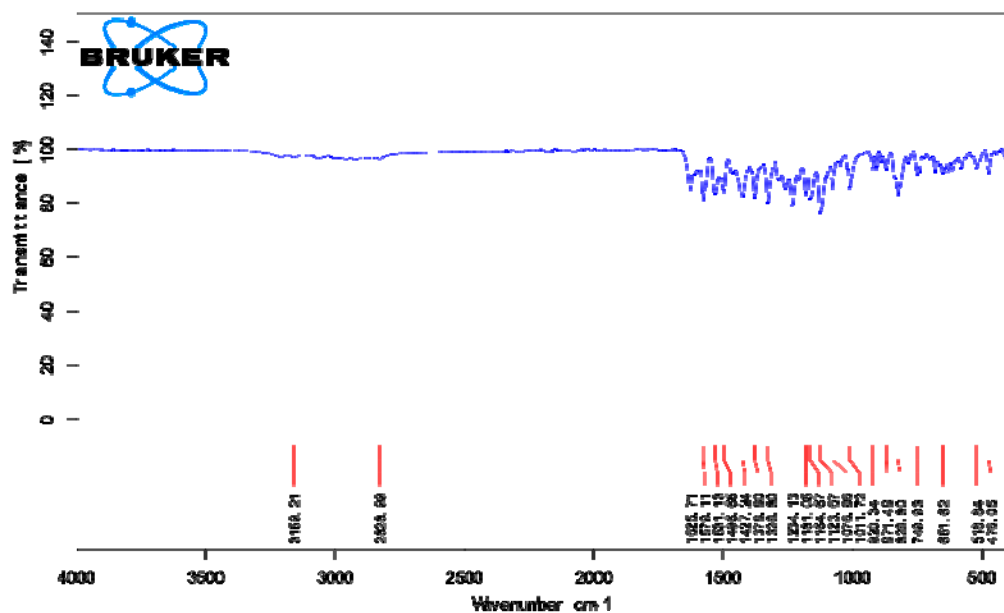

Figure S98. IR spectra of the target compound G17.

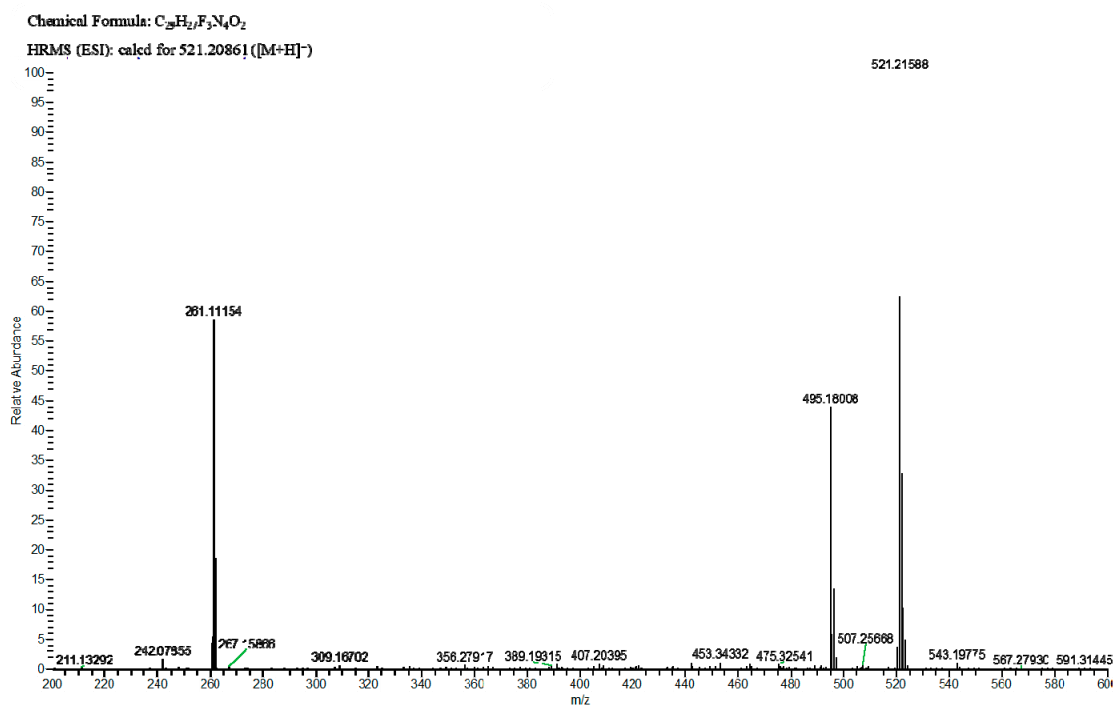Figure S99. HRMS (ESI) of the target compound **G18**.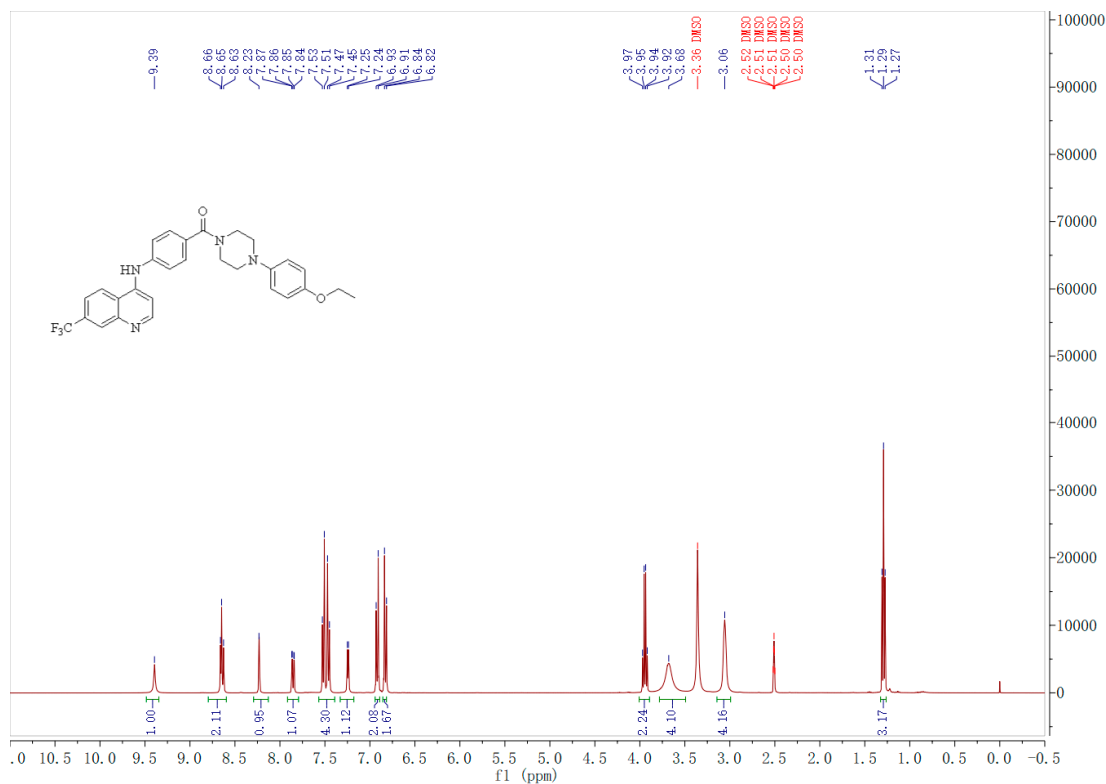Figure S100.  $^1\text{H}$  NMR spectra of the target compound **G18**.

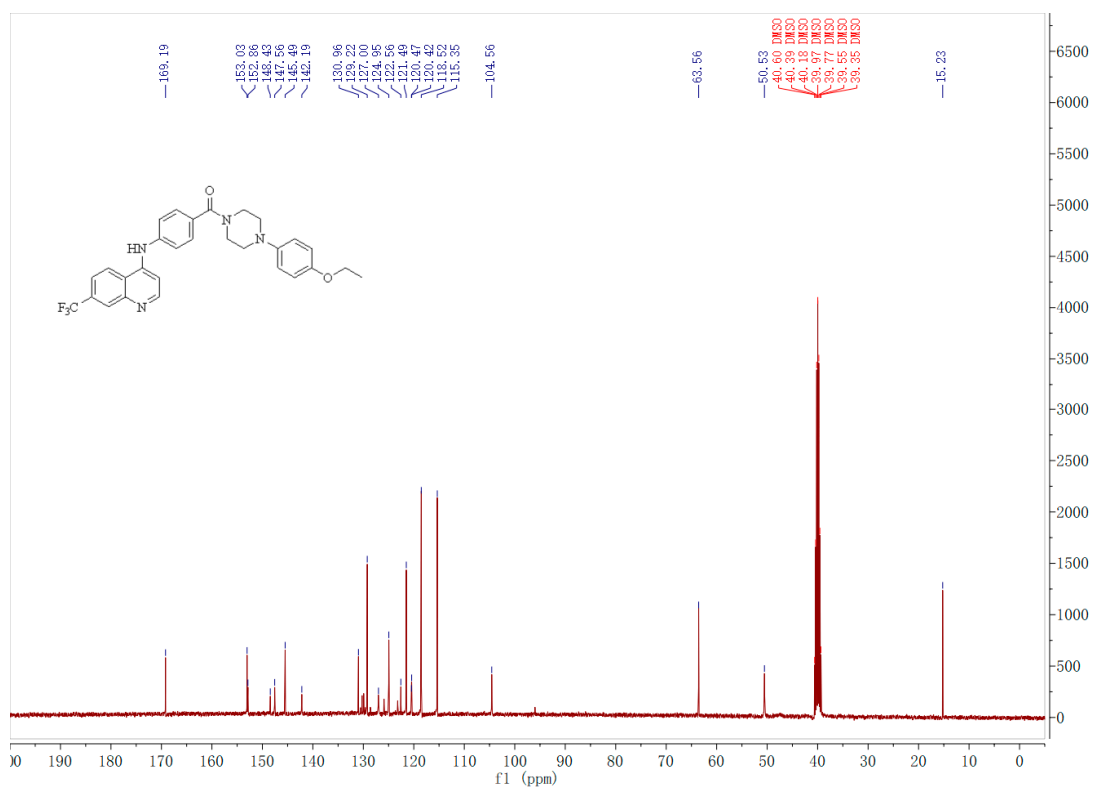Figure S101. <sup>13</sup>C NMR spectra of the target compound G18.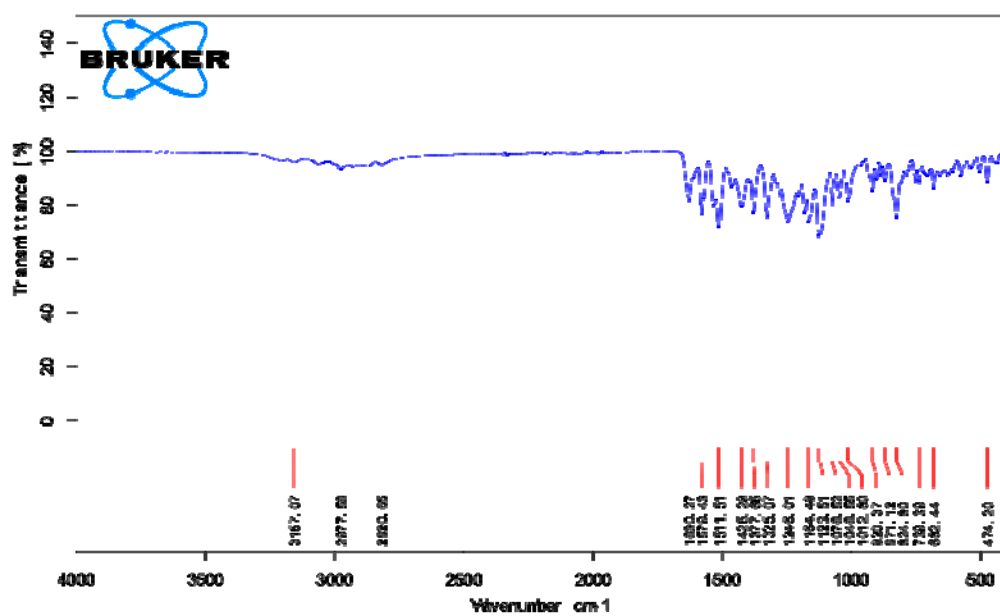

Figure S102. IR spectra of the target compound G18.

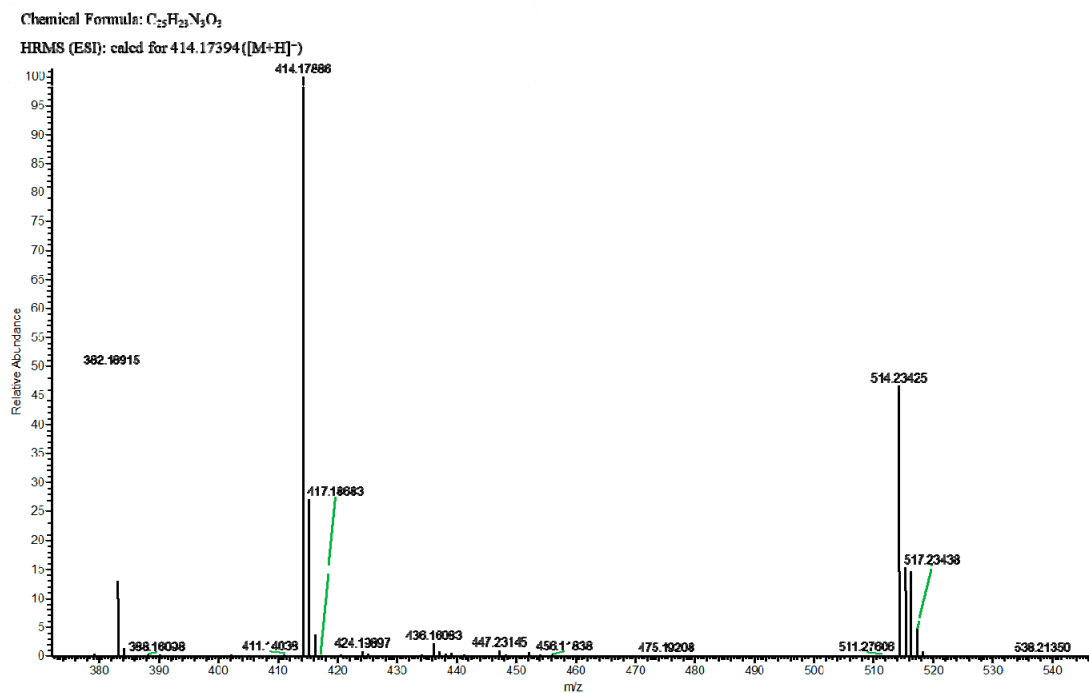Figure S103. HRMS (ESI) of the target compound **G19**.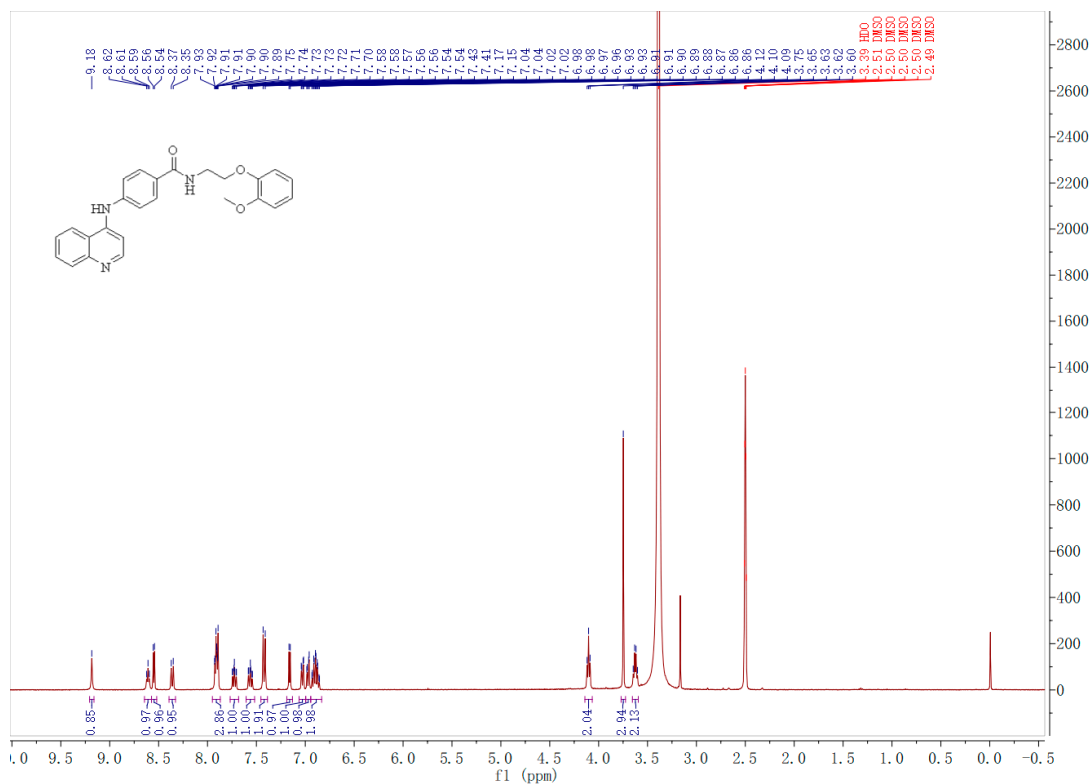Figure S104. <sup>1</sup>H NMR spectra of the target compound **G19**.

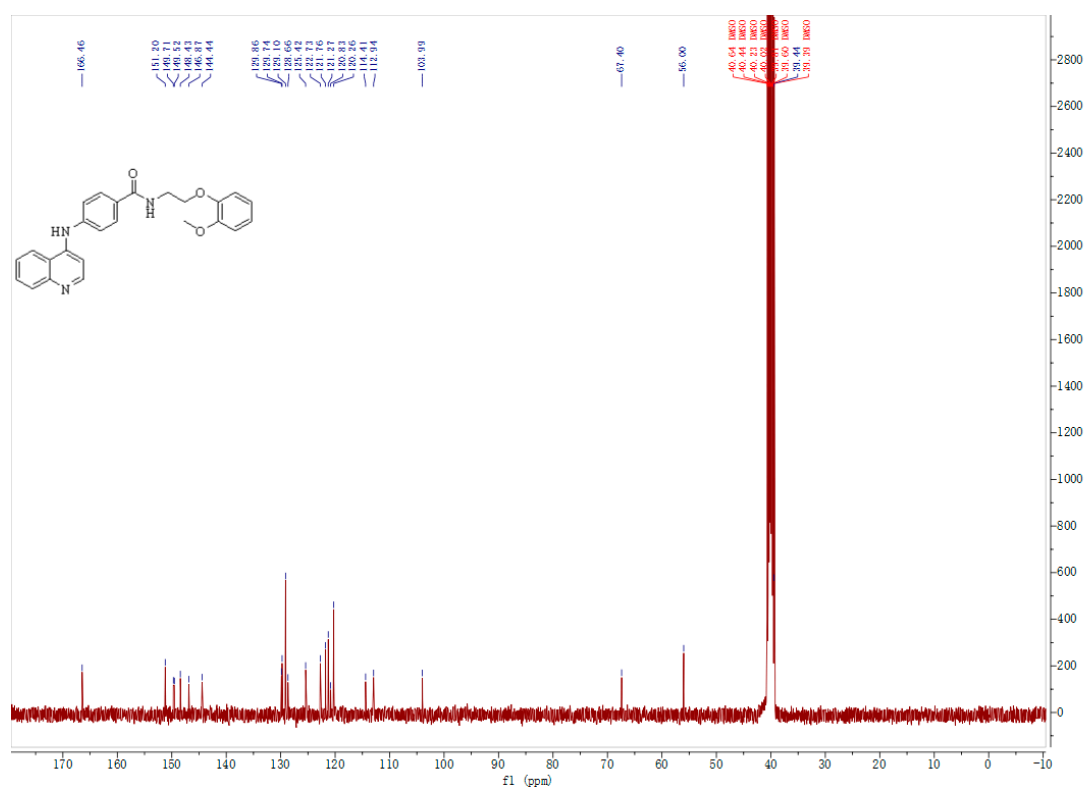Figure S105. <sup>13</sup>C NMR spectra of the target compound G19.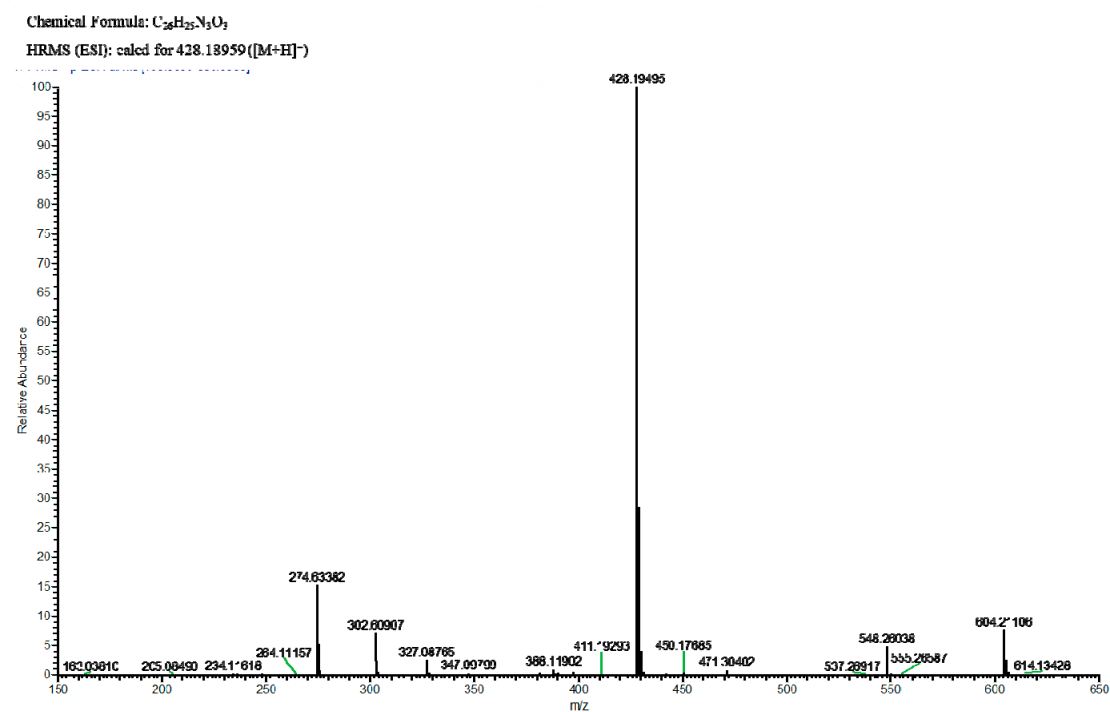

Figure S106. HRMS (ESI) of the target compound G20.

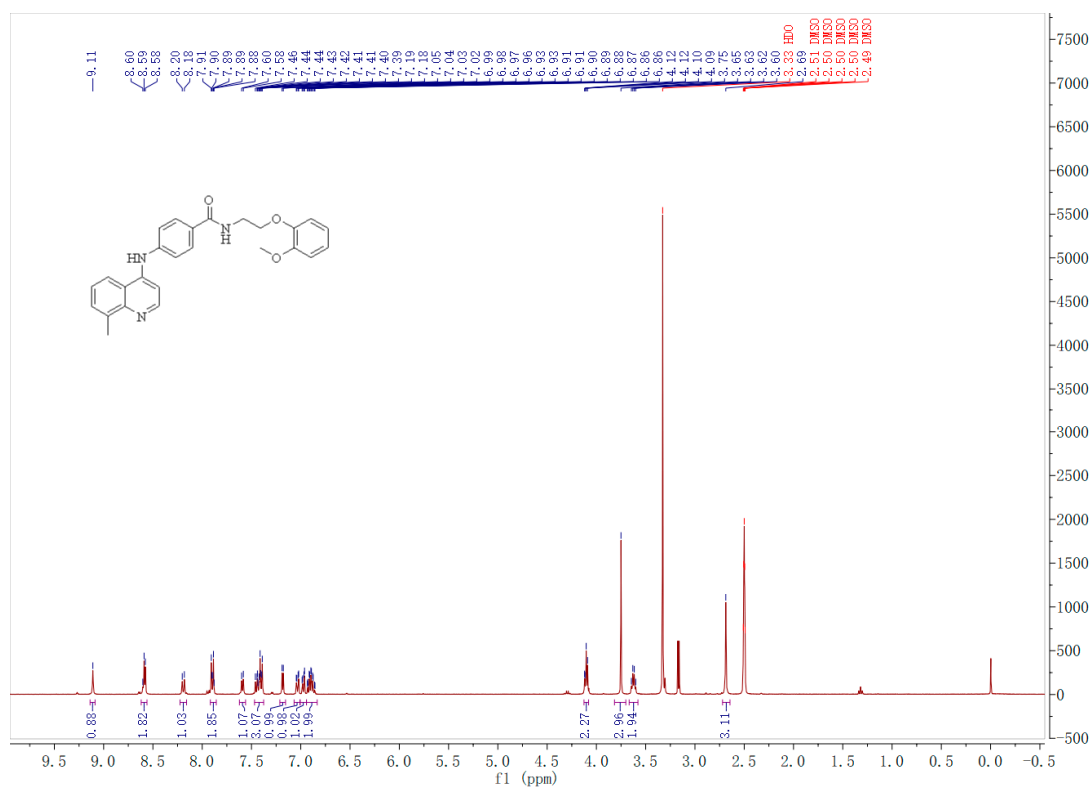Figure S107. <sup>1</sup>H NMR spectra of the target compound G20.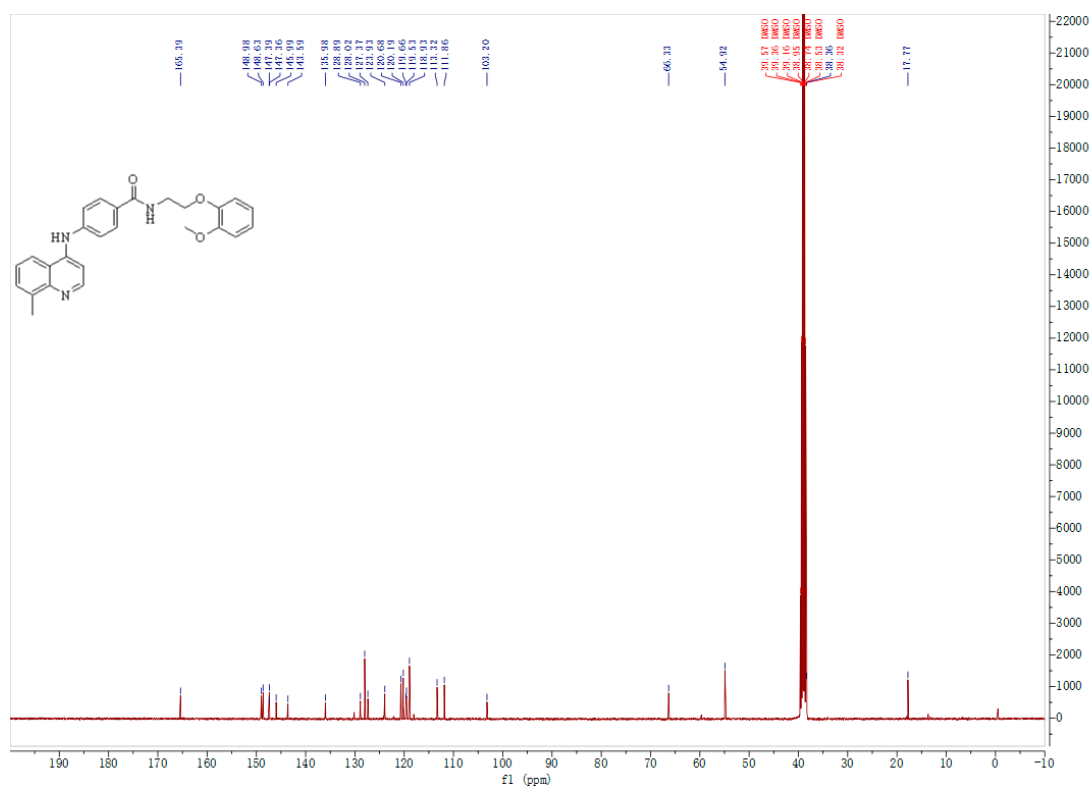



Chemical Formula:  $C_{26}H_{25}N_3O_3$ HRMS (ESI): calcd for 428.18959 ( $[M-H]^-$ )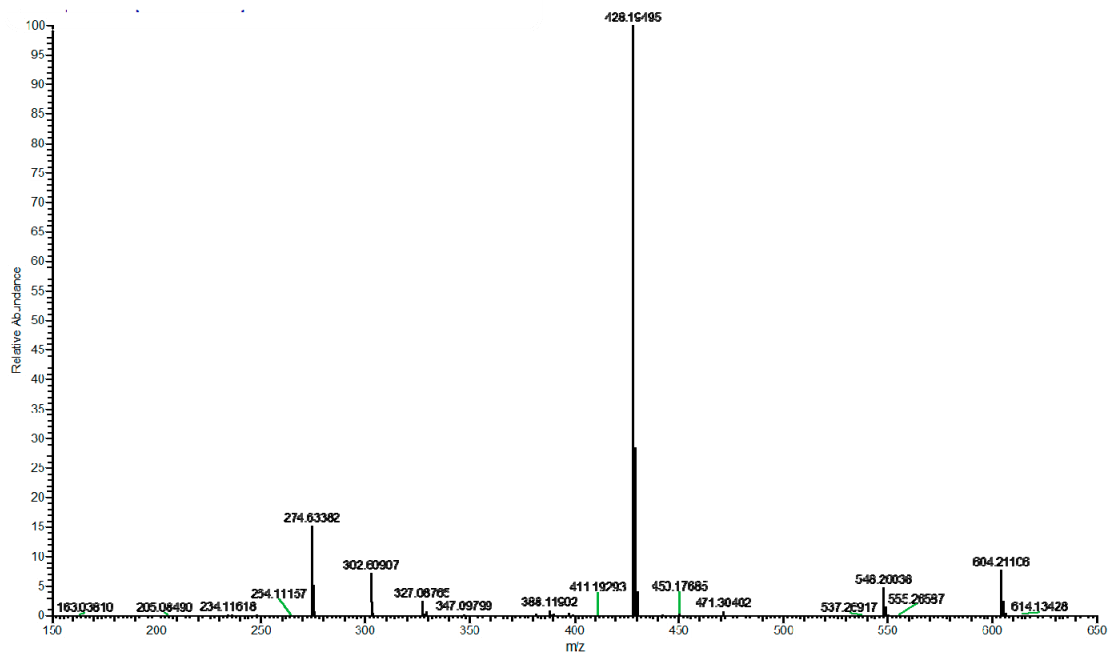

Figure S109. HRMS (ESI) of the target compound G21.

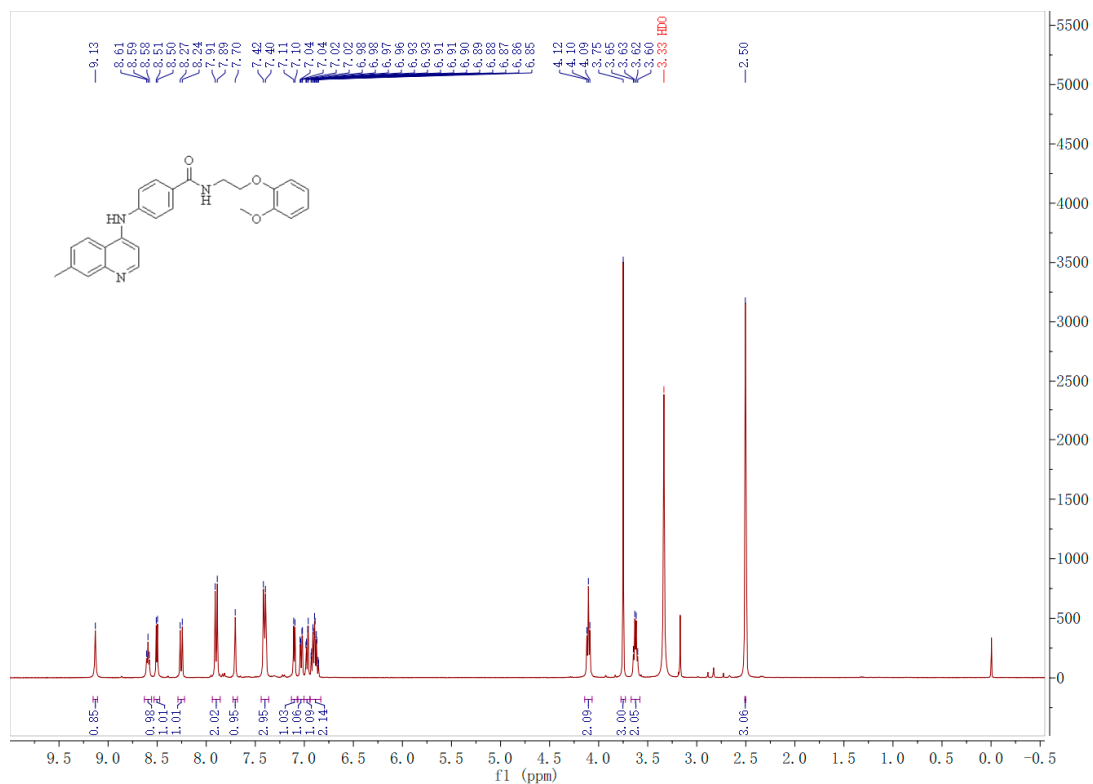

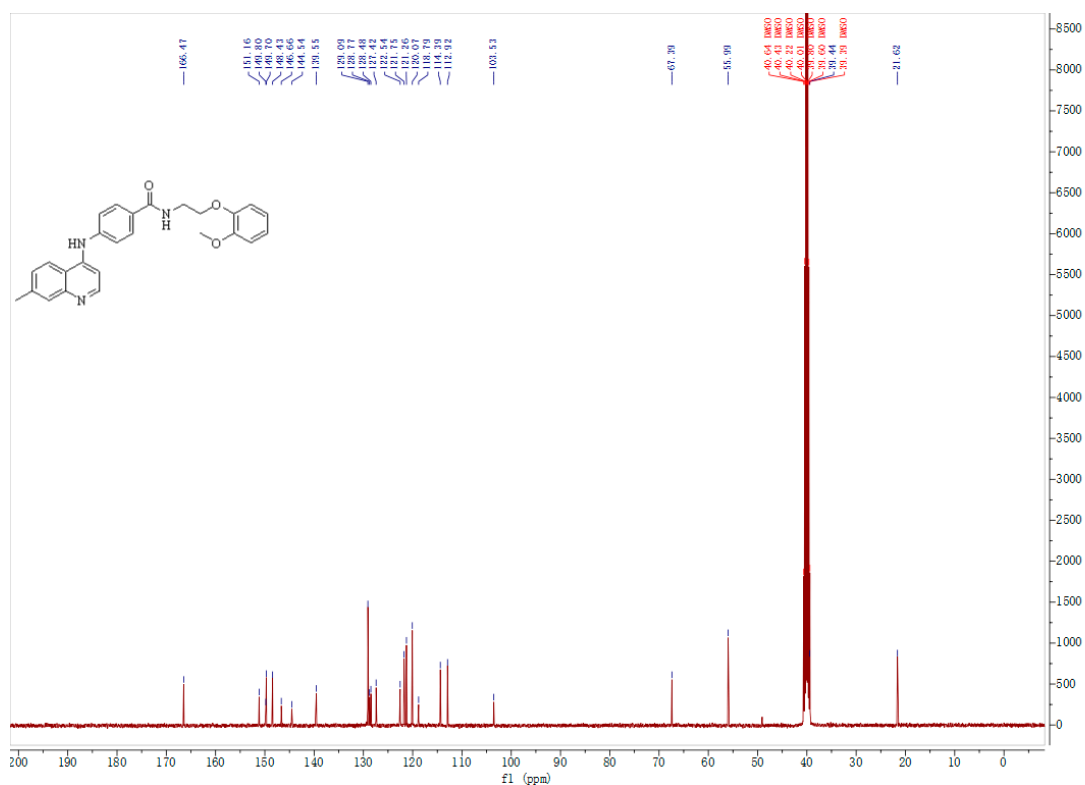

Figure S111.  $^{13}\text{C}$  NMR spectra of the target compound G21.

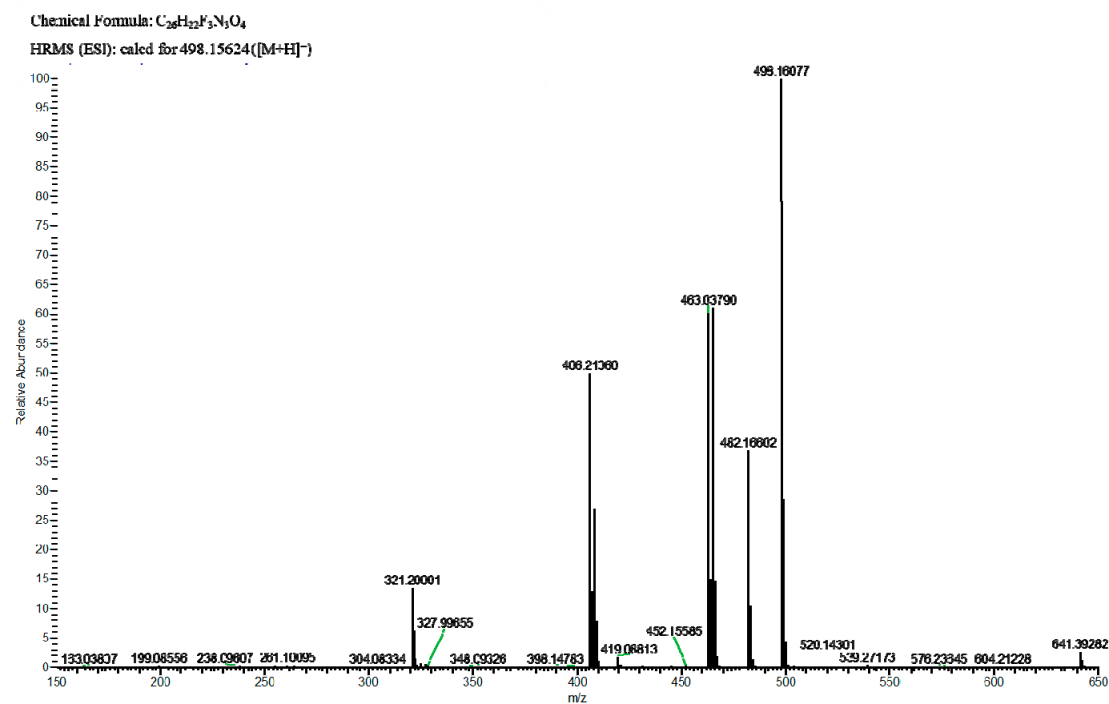

Figure S112. HRMS (ESI) of the target compound G22.

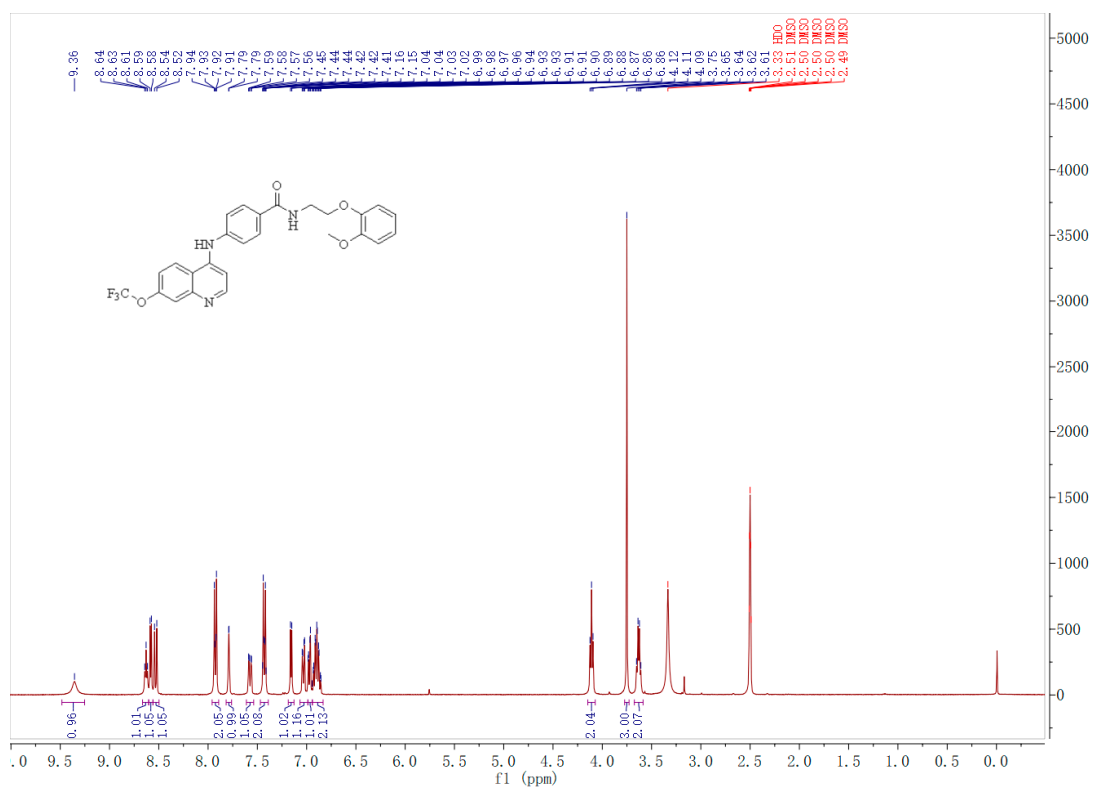Figure S113. <sup>1</sup>H NMR spectra of the target compound G22.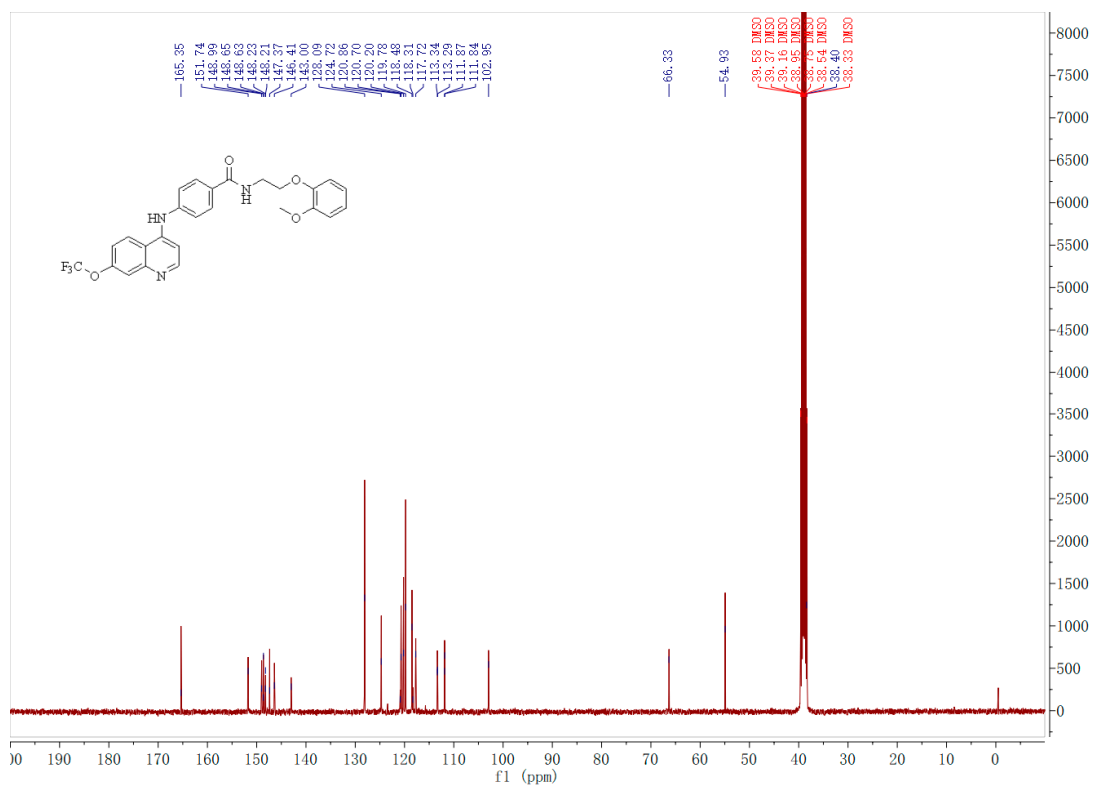Figure S114. <sup>13</sup>C NMR spectra of the target compound G22.

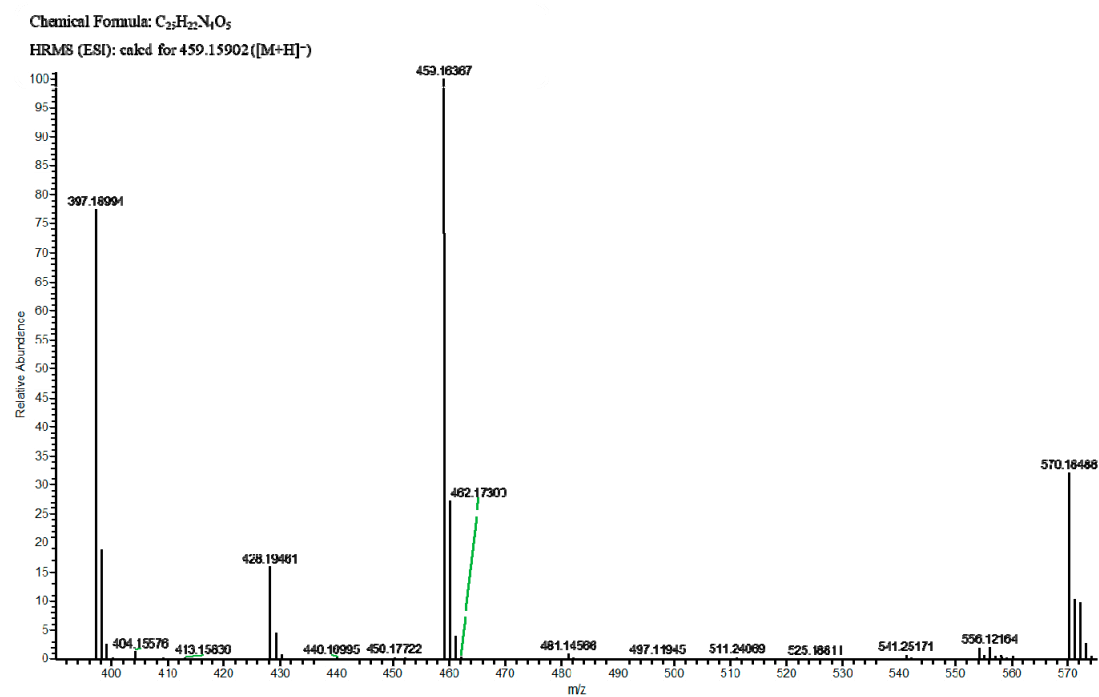

Figure S115. HRMS (ESI) of the target compound G23.

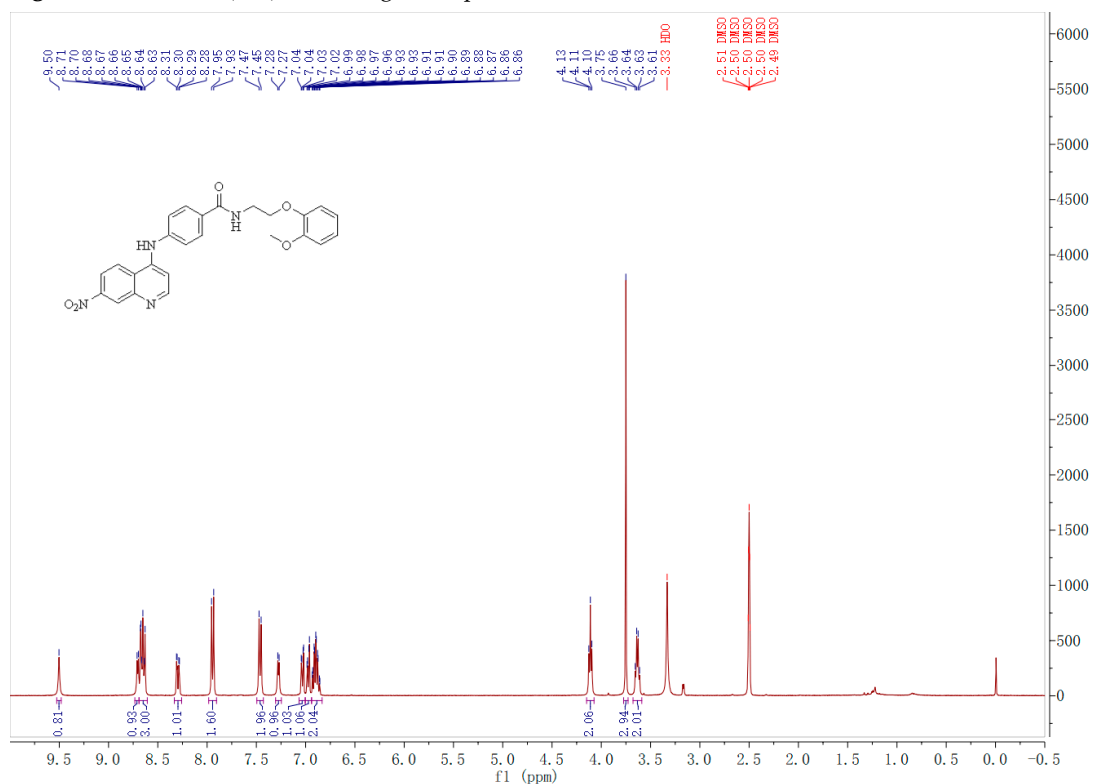Figure S116. <sup>1</sup>H NMR spectra of the target compound G23.

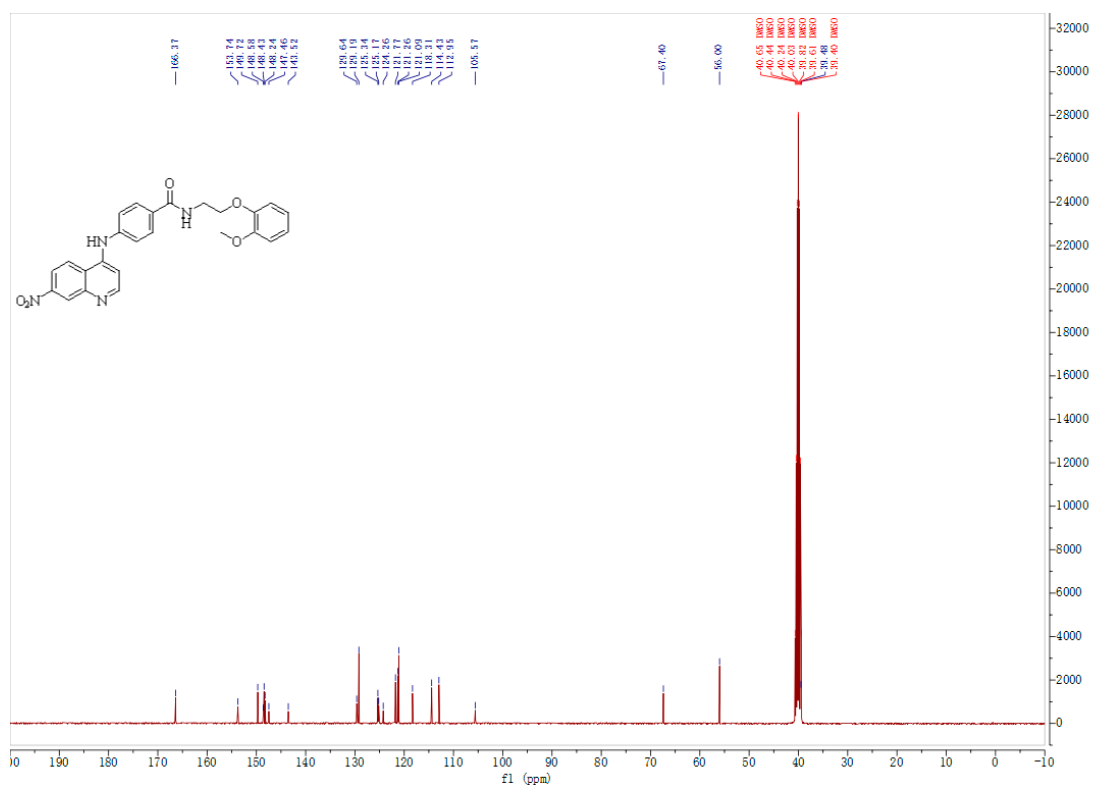Figure S117. <sup>13</sup>C NMR spectra of the target compound G23.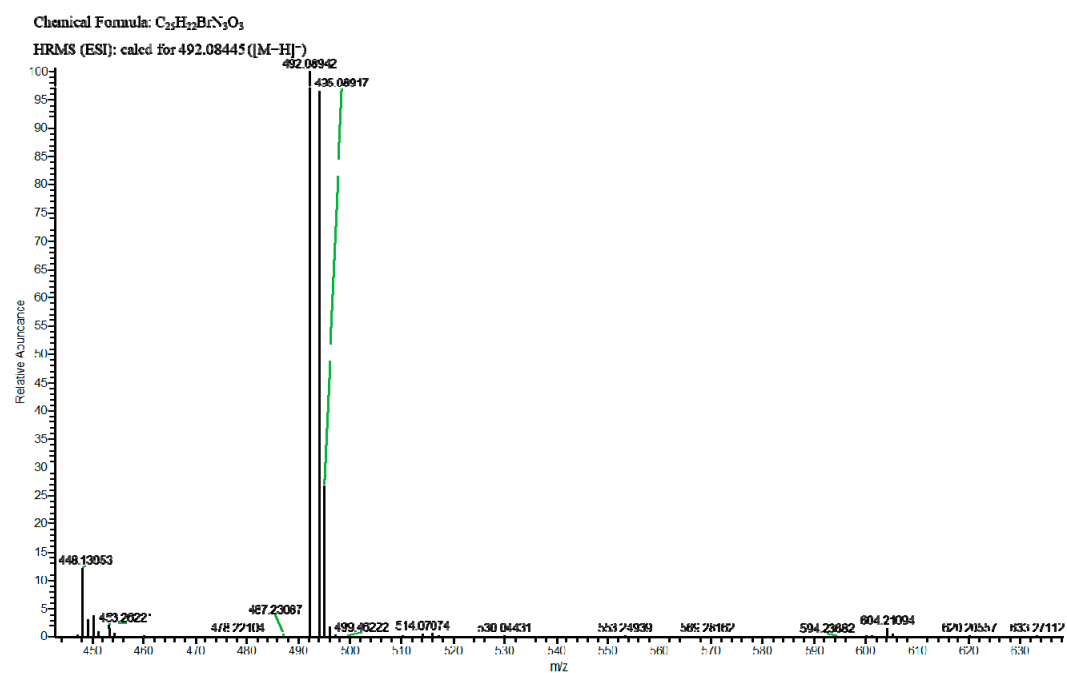

Figure S118. HRMS (ESI) of the target compound G24.

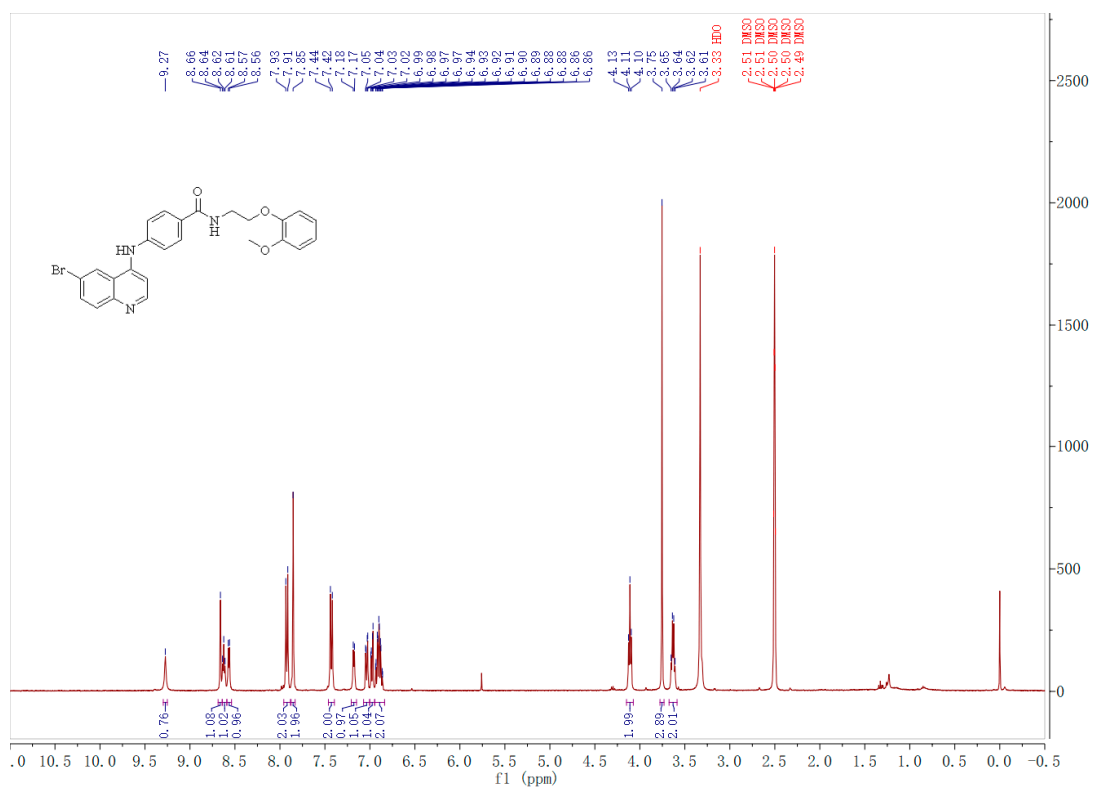Figure S119. <sup>1</sup>H NMR spectra of the target compound G24.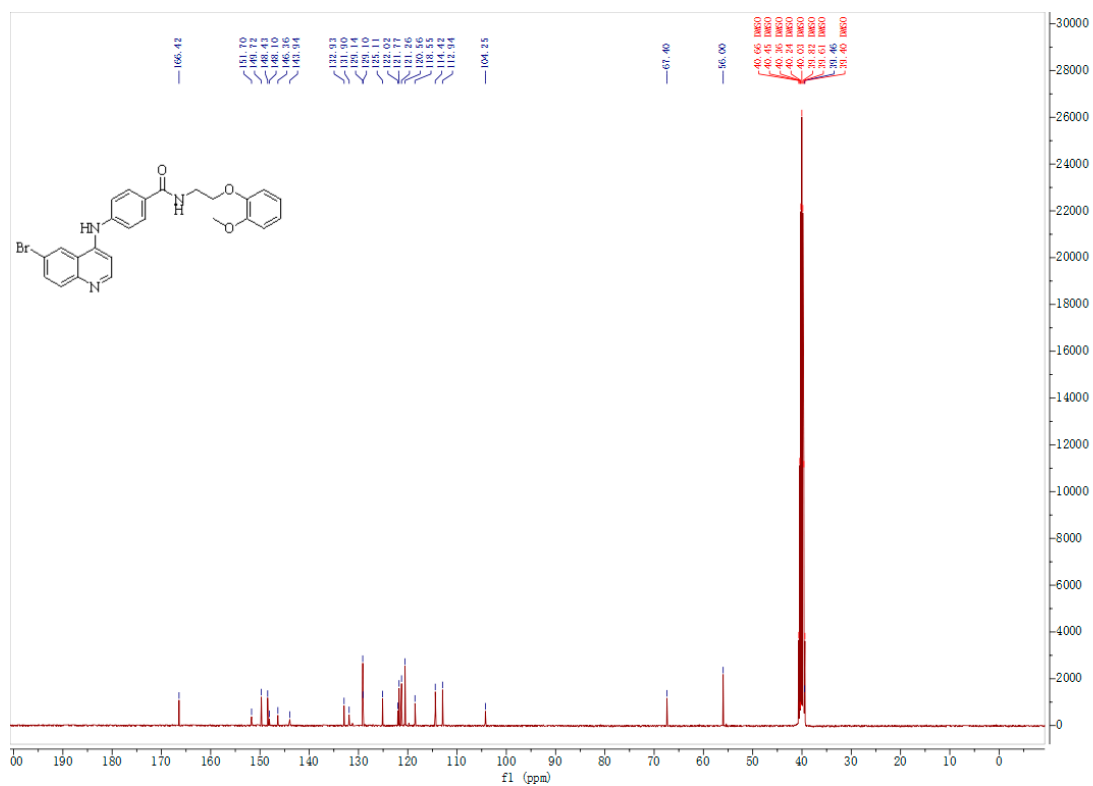Figure S120. <sup>13</sup>C NMR spectra of the target compound G24.

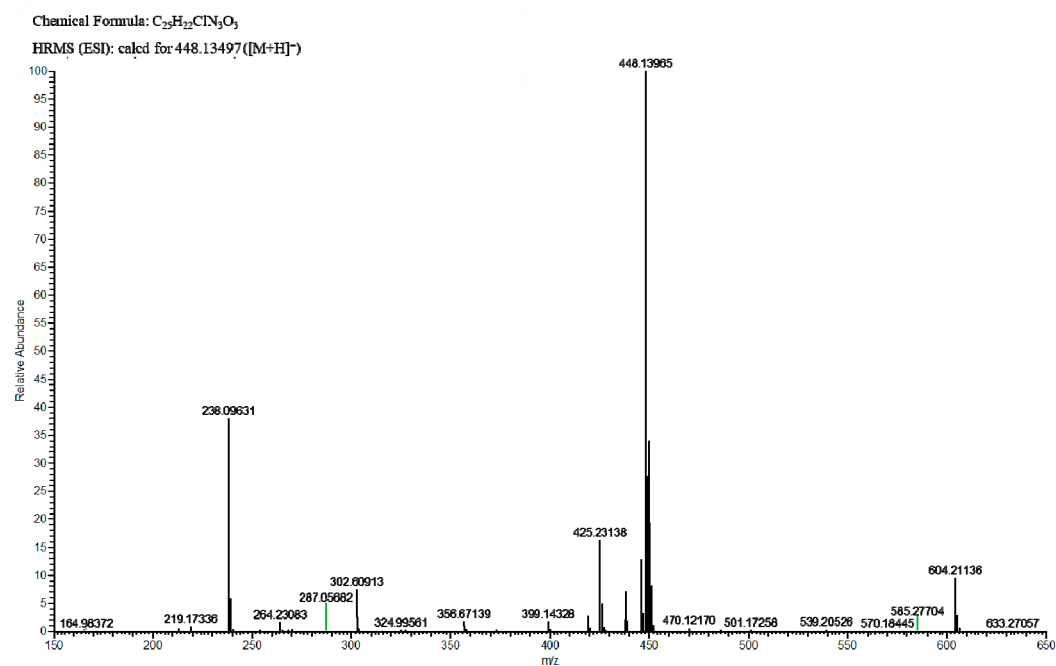

Figure S121. HRMS (ESI) of the target compound G25.

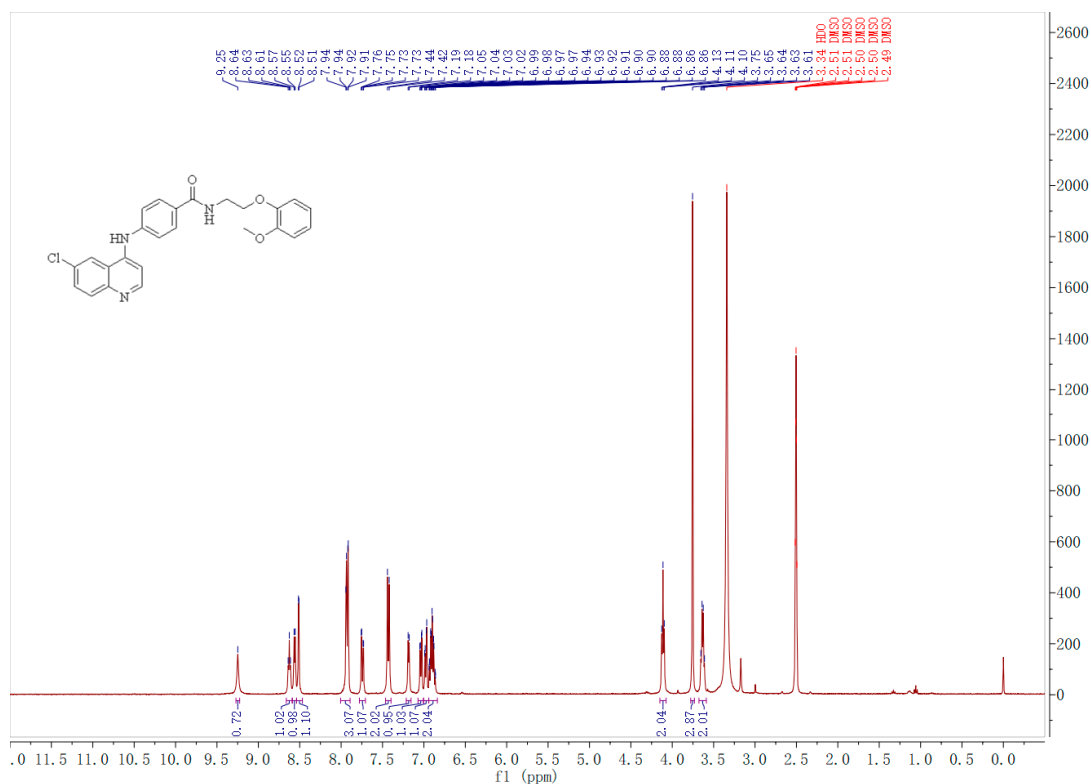Figure S122.  $^1H$  NMR spectra of the target compound G25.

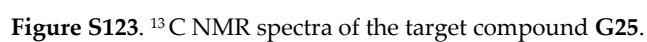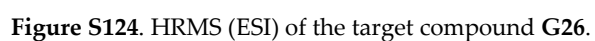



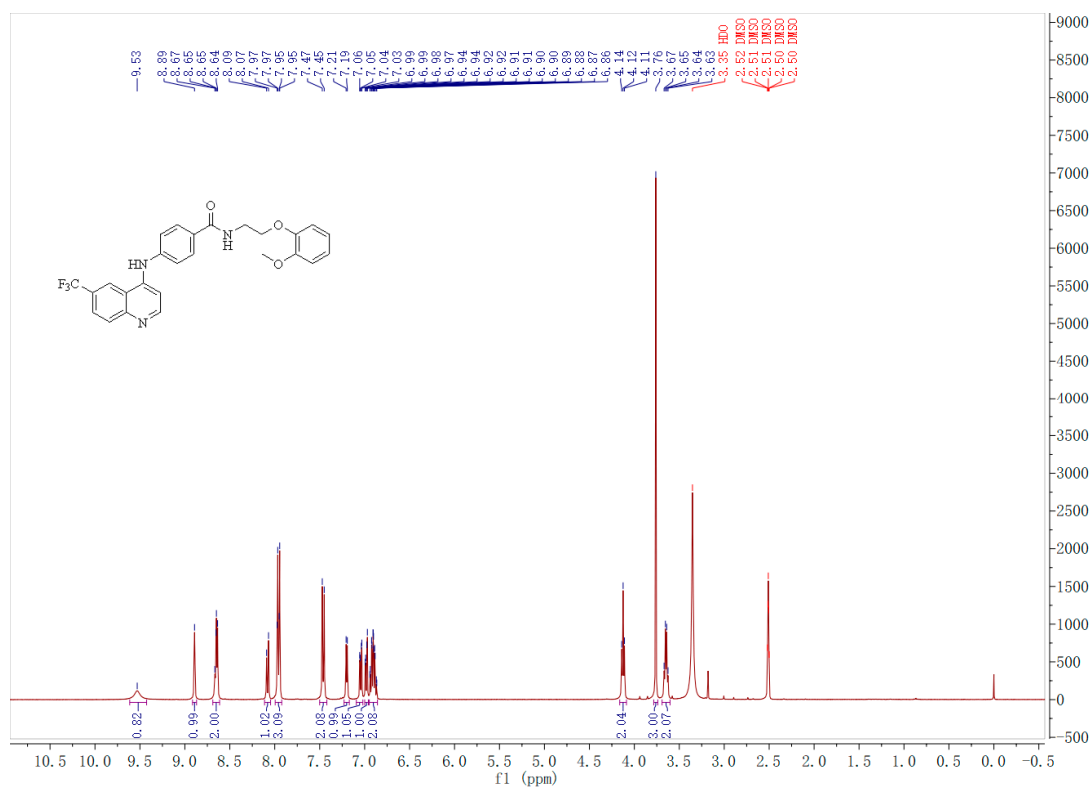Figure S125. <sup>1</sup>H NMR spectra of the target compound G26.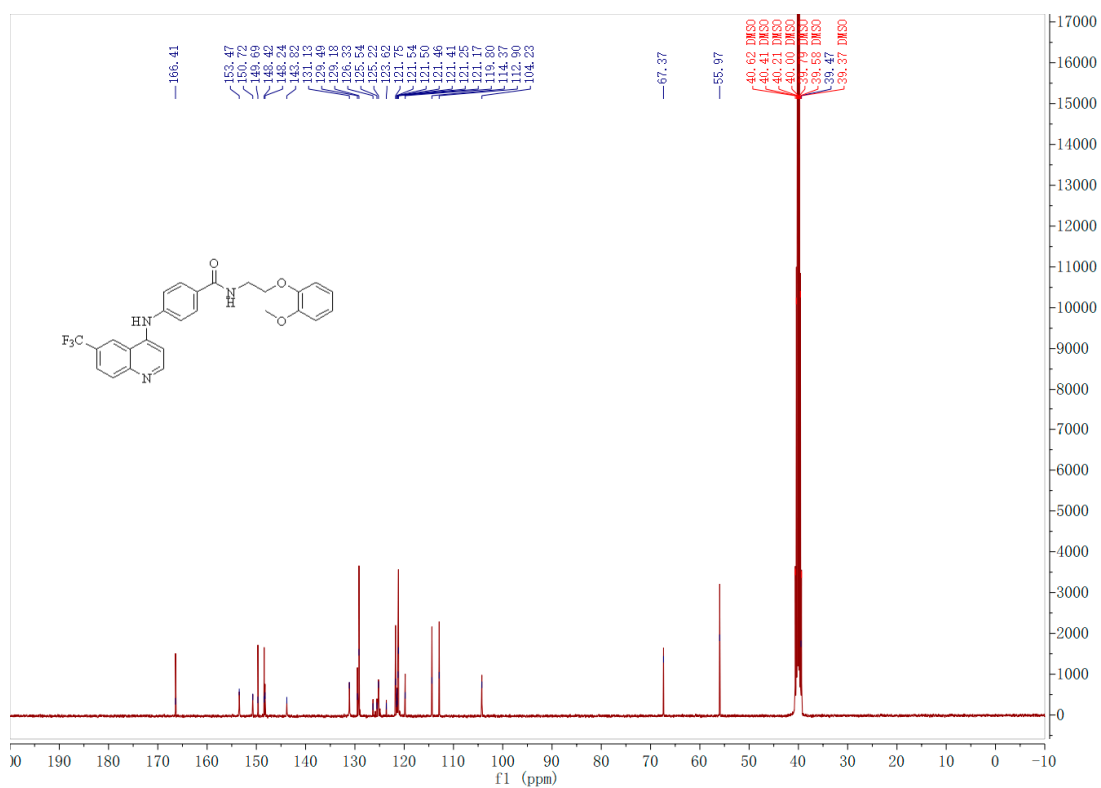Figure S126. <sup>13</sup>C NMR spectra of the target compound G26.

## References

1. Massari, S.; Bertagnin, C.; Pismataro, M.C.; Donnadio, A.; Nannetti, G.; Felicetti, T.; Bona, S.D.; Nizi, M.G.; Tensi, L.; Manfroni, G.; Loza, M.I.; Sabatini, S.; Cecchetti, V.; Brea, J.; Goracci, L.; Loregian, A.; Tabarrini, O. Synthesis and characterization of 1,2,4-triazolo[1,5-a]pyrimidine-2-carboxamide-based compounds targeting the PA-PB1 interface of influenza A virus polymerase. *Eur. J. Med. Chem.* **2021**, *209*, 112944. <https://doi.org/10.1016/j.ejmech.2020.112944>.
2. D'Agostino, I.; Giacchello, I.; Nannetti, G.; Fallacara, A.L.; Deodato, D.; Musumeci, F.; Grossi, G.; Palu, G.; Cau, Y.; Trist, I.M.; Loregian, A.; Schenone, S.; Botta, M. Synthesis and biological evaluation of a library of hybrid derivatives as inhibitors of influenza virus PA-PB1 interaction. *Eur. J. Med. Chem.* **2018**, *157*, 743–758. <https://doi.org/10.1016/j.ejmech.2018.08.032>.
3. Desantis, J.; Nannetti, G.; Massari, S.; Barreca, M.L.; Manfroni, G.; Cecchetti, V.; Palù, G.; Goracci, L.; Loregian, A.; Tabarrini, O. Exploring the cycloheptathiophene-3-carboxamide scaffold to disrupt the interactions of the influenza polymerase subunits and obtain potent anti-influenza activity. *Eur. J. Med. Chem.* **2017**, *138*, 128–139. <https://doi.org/10.1016/j.ejmech.2017.06.015>.
4. Massari, S.; Goracci, L.; Desantis, J.; Tabarrini, O. Polymerase acidic protein–basic protein 1 (PA–PB1) protein–protein interaction as a target for next-generation anti-influenza therapeutics. *J. Med. Chem.* **2016**, *59*(17), 7699–7718. <https://doi.org/10.1021/acs.jmedchem.5b01474>.
5. Massari, S.; Nannetti, G.; Desantis, J.; Muratore, G.; Sabatini, S.; Manfroni, G.; Mercorelli, B.; Cecchetti, V.; Palu, G.; Cruciani, G.; Loregian, A.; Goracci, L.; Tabarrini, O. A broad anti-influenza hybrid small molecule that potentially disrupts the interaction of polymerase acidic protein–basic protein 1 (PA–PB1) subunits. *J. Med. Chem.* **2015**, *58*(9), 3830–3842. <https://doi.org/10.1021/acs.jmedchem.5b00012>.
6. Lepri, S.; Nannetti, G.; Muratore, G.; Cruciani, G.; Ruzziconi, R.; Mercorelli, B.; Palu, G.; Loregian, A.; Goracci, L. Optimization of small-molecule inhibitors of influenza virus polymerase: from thiophene-3-carboxamide to polyamido scaffolds. *J. Med. Chem.* **2014**, *57*(10), 4337–4350. <https://doi.org/10.1021/jm500300r>.
7. Tintori, C.; Laurenzana, I.; Fallacara, A.L.; Kessler, U.; Pilger, B.; Stergiou, L.; Botta, M. High-throughput docking for the identification of new influenza A virus polymerase inhibitors targeting the PA–PB1 protein–protein interaction. *Bioorg. Med. Chem. Lett.* **2014**, *24*(1), 280–282. <https://doi.org/10.1016/j.bmcl.2013.11.019>.
8. Yesselman, J.D.; Price, D.J.; Knight, J.L.; Brooks, C.L. MATCH: an atom-typing toolset for molecular mechanics force fields. *J. Comput. Chem.* **2012**, *33*(2), 189–202. <https://doi.org/10.1002/jcc.21963>.
9. Krovat, E.M.; Langer, T. Non-peptide angiotensin II receptor antagonists: chemical feature based pharmacophore identification. *J. Med. Chem.* **2003**, *46*, 716–726. <https://doi.org/10.1021/jm021032v>.
10. Debnath, A.K. Pharmacophore mapping of a series of 2,4-diamino-5-deazapteridine inhibitors of mycobacterium avium complex dihydrofolate reductase. *J. Med. Chem.* **2002**, *45*, 41–53. <https://doi.org/10.1021/jm010360c>.
11. John, S.; Thangapandian, S.; Arooj, M.; Hong, J.C.; Kim, K.D.; Lee, K.W. Development, evaluation and application of 3D QSAR pharmacophore model in the discovery of potential human renin inhibitors. *BMC Bioinformatic* **2011**, *12*(S14), S4. <https://doi.org/10.1186/1471-2105-12-S14-S4>.
12. Jiang, Y.Y.; Gao, H.W. Pharmacophore-based drug design for the identification of novel butyrylcholinesterase inhibitors against alzheimer's disease. *Phytomedicine* **2019**, *54*, 278–290. <https://doi.org/10.1016/j.phymed.2018.09.199>.
